# Supplementary material for: E-Selective N-heterocyclic carbene-catalyzed reaction of aldehydes and butadienoates: effect of water and chloroform as the proton shuttle
Source: Royal Society of Chemistry journal article supplement (doi:10.1039/c8qo00579f), 2018-01-01

## Supporting Information

### ***E*-Selective *N*-Heterocyclic Carbene-Catalyzed Reaction of Aldehydes and Butadienoates: Effect of Water and Chloroform as the Proton Shuttle**

Dengke Ma,<sup>a</sup> Yulong Song,<sup>a</sup> Chunling Fu,<sup>a</sup> Fang Zhang,<sup>b</sup> Yinlong Guo,<sup>b</sup>

Xin Huang<sup>\*,a</sup> and Shengming Ma<sup>\*,a</sup>

<sup>a</sup> Laboratory of Molecular Recognition and Synthesis, Department of Chemistry, Zhejiang University, Hangzhou 310027, Zhejiang, People's Republic of China

<sup>b</sup> State Key Laboratory of Organometallic Chemistry and National Center for Organic Mass Spectrometry in Shanghai, Shanghai Institute of Organic Chemistry, Chinese Academy of Sciences, Shanghai 200032, People's Republic of China

Fax: (+86) 21-62609305

E-mail: xinhuangzju@zju.edu.cn; masm@sioc.ac.cn

|                                                                                        |          |
|----------------------------------------------------------------------------------------|----------|
| General information                                                                    | S2       |
| Preparation of standard products                                                       | S3-S4    |
| Mechanistic studies                                                                    | S5-S28   |
| Experimental details and analytical data of ( <i>E</i> )- <b>3aa-3la</b> and <b>6a</b> | S29-S42  |
| References                                                                             | S43      |
| Copies of <sup>1</sup> H and <sup>13</sup> C NMR spectra of products                   | S44-S119 |

**General information:**  $^1\text{H}$  and  $^{13}\text{C}$  NMR spectra were recorded with a Bruker AM 300 MHz spectrometer. IR spectra were recorded with a Perkin–Elmer 983G instrument. Elemental analyses were measured with a Carlo-Erba EA1110 elementary analysis instrument. Mass spectrometry was performed with an HP 5989A system. High-resolution mass spectrometry was determined with a Finnigan MAT 8430 or Bruker APEXIII instrument. 1-Ethyl-3-methylimidazolium tetrafluoroborate was purchased from Aladdin.  $\text{Cs}_2\text{CO}_3$  was purchased from Energy Chemical. Commercial  $\text{CHCl}_3$  was purchased from Sinopharm Chemical Reagent Co., Ltd and used as received. Anhydrous  $\text{CHCl}_3$  and  $\text{CDCl}_3$  were distilled from  $\text{CaH}_2$  under  $\text{N}_2$  before use. Anhydrous THF was distilled from Na wire using benzophenone as indicator under  $\text{N}_2$  before use. All liquid aldehydes were freshly distilled before use. Unless otherwise indicated, chemicals and solvents were purchased from commercial suppliers. The commercial petroleum ether (bp. 60~90 °C) was redistilled to collect the fraction of bp. in the range of 60~90 °C.

Allenoates **2a~2c** were prepared according to reported literatures.<sup>1</sup>

**1. Preparation of authentic products: benzyl 3-methyl-4-oxo-4-phenylbut-2(*E*)-enoate ((*E*)-3aa) (mdk-11-058-1), benzyl 3-methylene-4-oxo-4-phenylbutanoate (4aa) (mdk-11-058-2), and benzyl 3-methyl-4-oxo-4-phenylbut-2(*Z*)-enoate ((*Z*)-3aa) (mdk-11-058-3)**

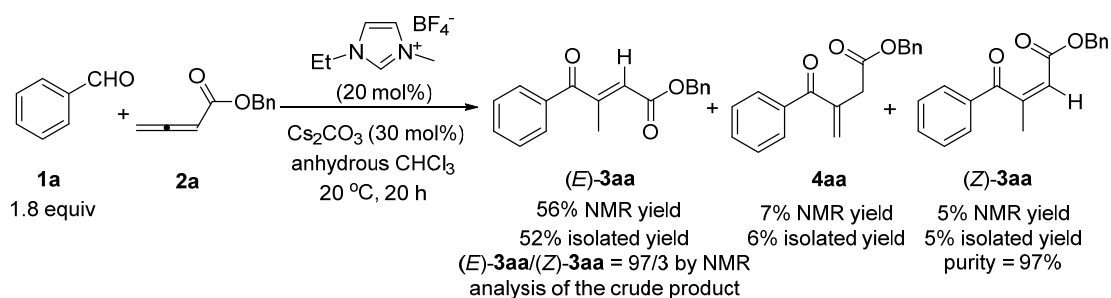

To a dry Schlenk flask was added Cs<sub>2</sub>CO<sub>3</sub> (0.0978 g, 0.3 mmol) in a glove box. Then 1-ethyl-3-methylimidazolium tetrafluoroborate (0.0405 g, 0.2 mmol) and anhydrous CHCl<sub>3</sub> (5 mL) were added sequentially under N<sub>2</sub>. The resulting mixture was stirred at 20 °C. After 10 min, **1a** (0.1912 g, 1.8 mmol), CHCl<sub>3</sub> (2.5 mL), **2a** (0.1749 g, 1 mmol), and CHCl<sub>3</sub> (2.5 mL) were added sequentially. The resulting mixture was stirred at 20 °C. After 20 h, the reaction was complete as monitored by TLC. Filtration through a short column of silica gel (eluent: ethyl acetate (20 mL × 3)), evaporation, and column chromatography on silica gel (petroleum ether/ethyl ether = 30/1 (450 mL × 5)) afforded (*E*)-**3aa** (0.1456 g, 52%), **4aa** (0.0163 g, 6%), and (*Z*)-**3aa** (0.0140 g, 5%, purity = 97%) (the ratio of (*E*)-**3aa**/(*Z*)-**3aa** was 92/8 and 7% of **4aa** was formed by NMR analysis of the crude product) (in the order of polarity in silica gel column).

(*E*)-**3aa**, the less polar isomer, liquid: <sup>1</sup>H NMR (300 MHz, CDCl<sub>3</sub>) δ 7.81-7.73 (m, 2H, ArH), 7.60-7.51 (m, 1H, ArH), 7.48-7.39 (m, 2H, ArH), 7.39-7.26 (m, 5H, ArH), 6.20

(q,  $J = 1.5$  Hz, 1H, =CH), 5.20 (s, 2H, CH<sub>2</sub>), 2.44 (d,  $J = 1.5$  Hz, 3H, CH<sub>3</sub>); <sup>13</sup>C NMR (75 MHz, CDCl<sub>3</sub>)  $\delta$  197.6, 165.4, 152.4, 135.6, 135.4, 133.0, 129.6, 128.5, 128.4, 128.3, 124.9, 66.4, 15.5; IR (neat)  $\nu$  (cm<sup>-1</sup>) 3064, 3034, 2955, 1723, 1663, 1596, 1579, 1498, 1448, 1381, 1352, 1316, 1267, 1190, 1138, 1075, 1037, 1023, 1002; MS (70 eV, EI)  $m/z$  (%) 280 (M<sup>+</sup>, 1.90), 91 (100); HRMS calcd for C<sub>18</sub>H<sub>16</sub>O<sub>3</sub> (M<sup>+</sup>): 280.1099, found: 280.1098.

**4aa**, the second polar isomer, liquid: <sup>1</sup>H NMR (300 MHz, CDCl<sub>3</sub>)  $\delta$  7.82-7.74 (m, 2H, ArH), 7.58-7.49 (m, 1H, ArH), 7.47-7.39 (m, 2H, ArH), 7.37-7.28 (m, 5H, ArH), 5.99 (s, 1H, one proton from =CH<sub>2</sub>), 5.78 (s, 1H, one proton from =CH<sub>2</sub>), 5.12 (s, 2H, CH<sub>2</sub>), 3.61 (s, 2H, CH<sub>2</sub>); <sup>13</sup>C NMR (75 MHz, CDCl<sub>3</sub>)  $\delta$  196.9, 170.7, 141.1, 137.2, 135.5, 132.3, 129.7, 128.9, 128.5, 128.3, 128.25, 128.16, 66.8, 38.1; IR (neat)  $\nu$  (cm<sup>-1</sup>) 3064, 3033, 2957, 1737, 1658, 1598, 1577, 1498, 1448, 1425, 1398, 1378, 1322, 1259, 1217, 1163, 1077, 1028; MS (ESI)  $m/z$  (%) 303 ([M + Na]<sup>+</sup>), 281 ([M + H]<sup>+</sup>); HRMS calcd. for C<sub>18</sub>H<sub>17</sub>O<sub>3</sub> ([M + H]<sup>+</sup>): 281.1172, found: 281.1175.

(*Z*)-**3aa**, the more polar isomer, liquid: <sup>1</sup>H NMR (300 MHz, CDCl<sub>3</sub>)  $\delta$  7.92-7.83 (m, 2H, ArH), 7.61-7.54 (m, 1H, ArH), 7.50-7.40 (m, 2H, ArH), 7.31-7.24 (m, 3H, ArH), 7.19-7.10 (m, 2H, ArH), 6.06 (q,  $J = 1.5$  Hz, 1H, =CH), 4.97 (s, 2H, CH<sub>2</sub>), 2.14 (d,  $J = 1.5$  Hz, 3H, CH<sub>3</sub>); <sup>13</sup>C NMR (75 MHz, CDCl<sub>3</sub>)  $\delta$  198.1, 164.5, 155.6, 135.2, 134.3, 133.6, 128.8, 128.7, 128.4, 128.3, 128.2, 119.2, 66.5, 21.8; IR (neat)  $\nu$  (cm<sup>-1</sup>) 3064, 3033, 2950, 1716, 1675, 1644, 1598, 1584, 1498, 1450, 1379, 1350, 1310, 1264, 1232, 1196, 1173, 1129, 1026, 1002; MS (ESI)  $m/z$  (%) 303 ([M + Na]<sup>+</sup>), 281 ([M + H]<sup>+</sup>); HRMS calcd. for C<sub>18</sub>H<sub>17</sub>O<sub>3</sub> ([M + H]<sup>+</sup>): 281.1172, found: 281.1179.

## 2. Mechanistic studies

### (1) The reaction profile as monitored by $^1\text{H}$ NMR analysis (mdk-11-103)

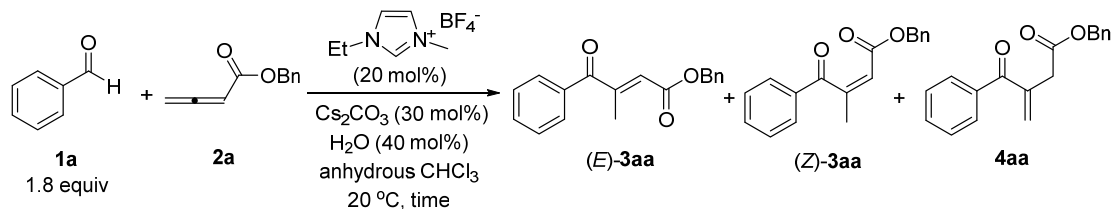

To a dry Schlenk flask was added  $\text{Cs}_2\text{CO}_3$  (0.0977 g, 0.3 mmol) in a glove box. Then 1-ethyl-3-methylimidazolium tetrafluoroborate (0.0406 g, 0.2 mmol) and anhydrous  $\text{CHCl}_3$  (5 mL) were added sequentially under  $\text{N}_2$ . The resulting mixture was stirred at 20 °C. After 10 min, **1a** (0.1906 g, 1.8 mmol),  $\text{CHCl}_3$  (2.5 mL), **2a** (0.1740 g, 1 mmol),  $\text{CHCl}_3$  (2.5 mL),  $\text{H}_2\text{O}$  (7.2  $\mu\text{L}$ ,  $d = 1 \text{ g/mL}$ , 0.0072 g, 0.4 mmol) and 1,3,5-trimethylbenzene (42  $\mu\text{L}$ , internal standard) were added sequentially. The resulting mixture was stirred at 20 °C. Then each time 0.2 mL of reaction mixture was taken by a syringe and submitted to  $^1\text{H}$  NMR analysis at 0.5 h, 1 h, 1.5 h, 2 h, 2.5 h, 3 h, 3.5 h, 4 h, 5 h, 6 h, 7 h, 8 h, 9 h, and 19 h.

Table S1. The reaction profile

| Entry | time<br>(h) | Yield <sup>a</sup> (%)   |                          |            | Recovery of <b>2a</b> <sup>a</sup> (%) |
|-------|-------------|--------------------------|--------------------------|------------|----------------------------------------|
|       |             | ( <i>E</i> )- <b>3aa</b> | ( <i>Z</i> )- <b>3aa</b> | <b>4aa</b> |                                        |
| 1     | 0.5         | 12                       | 0                        | 0          | 67                                     |
| 2     | 1           | 23                       | 0                        | 0          | 54                                     |
| 3     | 1.5         | 32                       | 0                        | 0          | 43                                     |
| 4     | 2           | 39                       | 0                        | 0          | 36                                     |
| 5     | 2.5         | 44                       | 0                        | 0          | 28                                     |
| 6     | 3           | 48                       | 0                        | 0          | 24                                     |
| 7     | 3.5         | 51                       | 0                        | 0          | 19                                     |
| 8     | 4           | 55                       | 0                        | 0          | 16                                     |
| 9     | 5           | 58                       | 0                        | 0          | 12                                     |
| 10    | 6           | 60                       | 0                        | 0          | 9                                      |
| 11    | 7           | 62                       | 0                        | 0          | 7                                      |
| 12    | 8           | 61                       | 0                        | 0.5        | 6                                      |
| 13    | 9           | 62                       | 0                        | 1          | 4                                      |
| 14    | 19          | 63                       | 0.1                      | 2          | 1                                      |

<sup>a</sup> Determined by NMR using 1,3,5-trimethylbenzene as the internal standard.

## (2) Isotopic labeling experiments

### (2.1) The reaction of **1a** and **2a** using D<sub>2</sub>O instead of H<sub>2</sub>O (mdk-11-079)

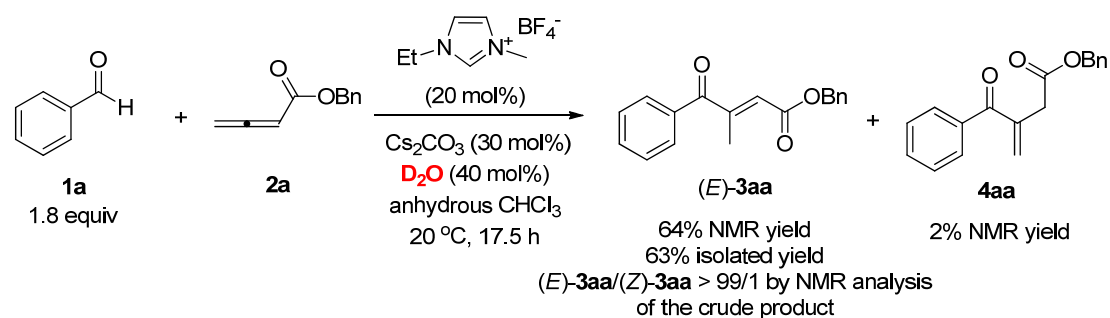

**Typical Procedure I:** To a dry Schlenk flask was added Cs<sub>2</sub>CO<sub>3</sub> (0.0980 g, 0.3 mmol) in a glove box. Then 1-ethyl-3-methylimidazolium tetrafluoroborate (0.0408 g,

0.2 mmol) and anhydrous  $\text{CHCl}_3$  (5 mL) were added sequentially under  $\text{N}_2$ . The resulting mixture was stirred at 20 °C. After 10 min, **1a** (0.1914 g, 1.8 mmol), anhydrous  $\text{CHCl}_3$  (2.5 mL), **2a** (0.1745 g, 1 mmol), anhydrous  $\text{CHCl}_3$  (2.5 mL), and  $\text{D}_2\text{O}$  (7.2  $\mu\text{L}$ ,  $d = 1.107 \text{ g/mL}$ , 0.0080 g, 0.4 mmol) were added sequentially. The resulting mixture was stirred at 20 °C. After 17.5 h, the reaction was complete as monitored by TLC. Filtration through a short column of silica gel (eluent: ethyl acetate (20 mL  $\times$  3)), evaporation, and column chromatography on silica gel (petroleum ether/ethyl acetate = 40/1 (400 mL) to 20/1 (420 mL)) afforded (*E*)-**3aa** (0.1780 g, 63%) (The ratio of (*E*)-**3aa**/(*Z*)-**3aa** was >99/1 and 2% of **4aa** was detected by NMR analysis of the crude product) as a liquid:  $^1\text{H}$  NMR (300 MHz,  $\text{CDCl}_3$ )  $\delta$  7.81-7.73 (m, 2H, ArH), 7.61-7.53 (m, 1H, ArH), 7.49-7.41 (m, 2H, ArH), 7.40-7.27 (m, 5H, ArH), 6.20 (q,  $J = 1.5 \text{ Hz}$ , 1H, =CH), 5.21 (s, 2H,  $\text{CH}_2$ ), 2.44 (d,  $J = 1.5 \text{ Hz}$ , 3H,  $\text{CH}_3$ );  $^{13}\text{C}$  NMR (75 MHz,  $\text{CDCl}_3$ )  $\delta$  197.7, 165.5, 152.5, 135.7, 135.4, 133.1, 129.6, 128.53, 128.48, 128.3, 124.9, 66.4, 15.5.

**(2.2) The reaction of 1a-D and 2a in anhydrous  $\text{CHCl}_3$  (mdk-11-086)**

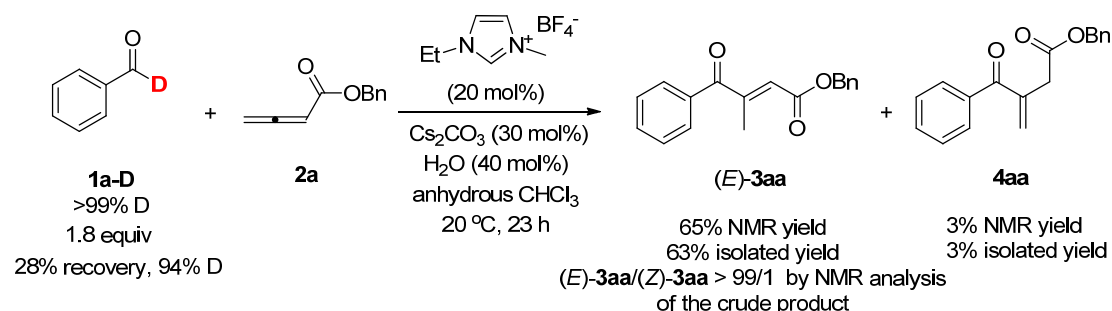

Following **Typical Procedure I**, the reaction of  $\text{Cs}_2\text{CO}_3$  (0.0980 g, 0.3 mmol), 1-ethyl-3-methylimidazolium tetrafluoroborate (0.0408 g, 0.2 mmol)/anhydrous  $\text{CHCl}_3$  (5 mL), **1a-D**<sup>2</sup> (0.1927 g, 1.8 mmol)/anhydrous  $\text{CHCl}_3$  (2.5 mL), **2a** (0.1743 g,

1 mmol)/anhydrous  $\text{CHCl}_3$  (2.5 mL), and  $\text{H}_2\text{O}$  (7.2  $\mu\text{L}$ ,  $d = 1.000 \text{ g/mL}$ , 0.0072 g, 0.4 mmol) at 20 °C for 23 h afforded (*E*)-**3aa** (0.1776 g, 63%) and **4aa** (0.0081 g, 3%) (petroleum ether/ethyl ether = 30/1 (450 mL  $\times$  3) to 20/1 (200 mL)) (The ratio of (*E*)-**3aa**/(*Z*)-**3aa** was >99/1 and 3% of **4aa** was detected by NMR analysis of the crude product).

(*E*)-**3aa**, liquid:  $^1\text{H}$  NMR (300 MHz,  $\text{CDCl}_3$ )  $\delta$  7.81-7.73 (m, 2H, ArH), 7.61-7.52 (m, 1H, ArH), 7.49-7.41 (m, 2H, ArH), 7.40-7.26 (m, 5H, ArH), 6.20 (q,  $J = 1.4 \text{ Hz}$ , 1H, =CH), 5.21 (s, 2H,  $\text{CH}_2$ ), 2.44 (d,  $J = 1.5 \text{ Hz}$ , 3H,  $\text{CH}_3$ );  $^{13}\text{C}$  NMR (75 MHz,  $\text{CDCl}_3$ )  $\delta$  197.7, 165.5, 152.5, 135.7, 135.4, 133.1, 129.6, 128.53, 128.45, 128.3, 124.9, 66.4, 15.5.

**4aa**, liquid:  $^1\text{H}$  NMR (300 MHz,  $\text{CDCl}_3$ )  $\delta$  7.81-7.72 (m, 2H, ArH), 7.58-7.50 (m, 1H, ArH), 7.46-7.38 (m, 2H, ArH), 7.36-7.28 (m, 5H, ArH), 5.99 (s, 1H, one proton from = $\text{CH}_2$ ), 5.78 (s, 1H, one proton from = $\text{CH}_2$ ), 5.12 (s, 2H,  $\text{CH}_2$ ), 3.61 (s, 2H,  $\text{CH}_2$ );  $^{13}\text{C}$  NMR (75 MHz,  $\text{CDCl}_3$ )  $\delta$  196.9, 170.7, 141.2, 137.2, 135.5, 132.3, 129.7, 128.9, 128.5, 128.31, 128.26, 128.2, 66.8, 38.1.

### (2.3) The reaction of **1a-D** and **2a** in anhydrous THF (mdk-11-107)

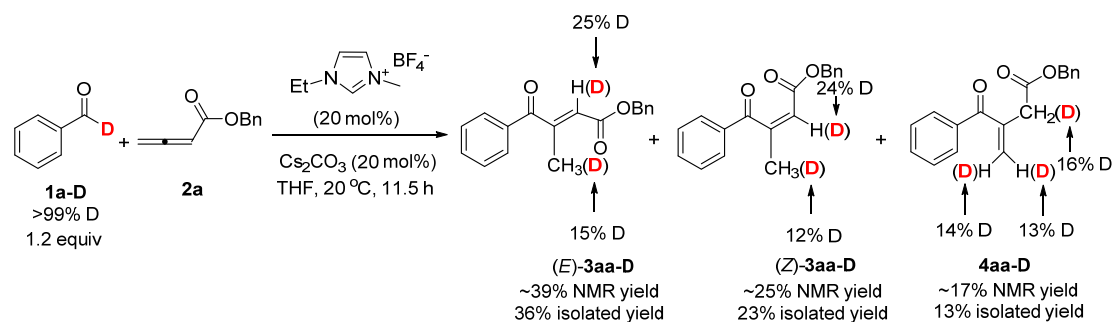

To a dry Schlenk flask was added  $\text{Cs}_2\text{CO}_3$  (0.0262 g, 0.08 mmol) in a glove box. Then 1-ethyl-3-methylimidazolium tetrafluoroborate (0.0160 g, 0.08 mmol) and THF



(2 mL) were added sequentially under N<sub>2</sub>. The resulting mixture was stirred at 20 °C. After 10 min, **1a-D** (0.0516 g, 0.48 mmol), THF (1 mL), **2a** (0.0694 g, 0.4 mmol), and THF (1 mL) were added sequentially. The resulting mixture was stirred at 20 °C. After 11.5 h, the reaction was complete as monitored by TLC. Filtration through a short column of silica gel (eluent: ethyl acetate (15 mL × 3)), evaporation, and column chromatography on silica gel (petroleum ether/ethyl ether = 40/1 (400 mL × 3) to 30/1 (400 mL) to 20/1 (400 mL)) afforded (*E*)-**3aa-D** (0.0409 g, 36%), **4aa-D** (0.0142 g, 13%), and (*Z*)-**3aa-D** (0.0260 g, 23%) (The ratio of *E/Z* was ~61/39 and ~17% of **4aa-D** was detected by NMR analysis of the crude product) (in the order of polarity in silica gel column).

(*E*)-**3aa-D**, the least isomer, liquid: <sup>1</sup>H NMR (300 MHz, CDCl<sub>3</sub>) δ 7.82-7.73 (m, 2H, ArH), 7.62-7.53 (m, 1H, ArH), 7.51-7.41 (m, 2H, ArH), 7.41-7.27 (m, 5H, ArH), 5.21 (s, 2H, CH<sub>2</sub>); the following signals is discernible for (*E*)-**3aa**: δ 6.23-6.17 (m, 0.75H, =CH), 2.49-2.35 (m, 1.61H, CH<sub>3</sub>).

**4aa-D**, the second polar isomer, liquid: <sup>1</sup>H NMR (300 MHz, CDCl<sub>3</sub>) δ 7.81-7.73 (m, 2H, ArH), 7.58-7.49 (m, 1H, ArH), 7.46-7.38 (m, 2H, ArH), 7.38-7.27 (m, 5H, ArH), 5.12 (s, 2H, CH<sub>2</sub>); the following signals is discernible for **4aa**: δ 6.01-5.95 (m, 0.87H, one proton from =CH<sub>2</sub>), 5.79-5.74 (m, 0.86H, one proton from =CH<sub>2</sub>), 3.64-3.55 (m, 1.68H, CH<sub>2</sub>); IR (neat) ν (cm<sup>-1</sup>) 3063, 3033, 2950, 1716, 1675, 1642, 1598, 1583, 1498, 1449, 1379, 1350, 1316, 1262, 1195, 1172, 1128, 1026, 1002; MS (ESI) *m/z* (%) 303 ([M + Na]<sup>+</sup>), 281 ([M + H]<sup>+</sup>); HRMS calcd. for C<sub>18</sub>H<sub>17</sub>O<sub>3</sub> ([M + H]<sup>+</sup>): 281.1172, found: 281.1175. For detailed MS and HRMS spectra, please see attached copies.

(*Z*)-**3aa-D**, the most polar isomer, liquid:  $^1\text{H}$  NMR (300 MHz,  $\text{CDCl}_3$ )  $\delta$  7.91-7.82 (m, 2H, ArH), 7.61-7.53 (m, 1H, ArH), 7.49-7.39 (m, 2H, ArH), 7.32-7.21 (m, 3H, ArH), 7.19-7.09 (m, 2H, ArH), 4.96 (s, 2H,  $\text{CH}_2$ ); the following signals is discernible for (*Z*)-**3aa**:  $\delta$  6.09-6.03 (m, 0.76H, =CH), 2.18-2.08 (m, 2.64H,  $\text{CH}_3$ ); IR (neat)  $\nu$  ( $\text{cm}^{-1}$ ) 3088, 3064, 3033, 2955, 1737, 1658, 1598, 1498, 1447, 1400, 1378, 1321, 1259, 1215, 1163, 1077, 1028; MS (ESI)  $m/z$  (%) 303 ( $[\text{M} + \text{Na}]^+$ ), 281 ( $[\text{M} + \text{H}]^+$ ); HRMS calcd. for  $\text{C}_{18}\text{H}_{17}\text{O}_3$  ( $[\text{M} + \text{H}]^+$ ): 281.1172, found: 281.1172. For detailed MS and HRMS spectra, please see attached copies.

(2.4) The reaction of **1a** and **2a** using  $\text{D}_2\text{O}$  instead of  $\text{H}_2\text{O}$  in anhydrous THF (hx-16-162)

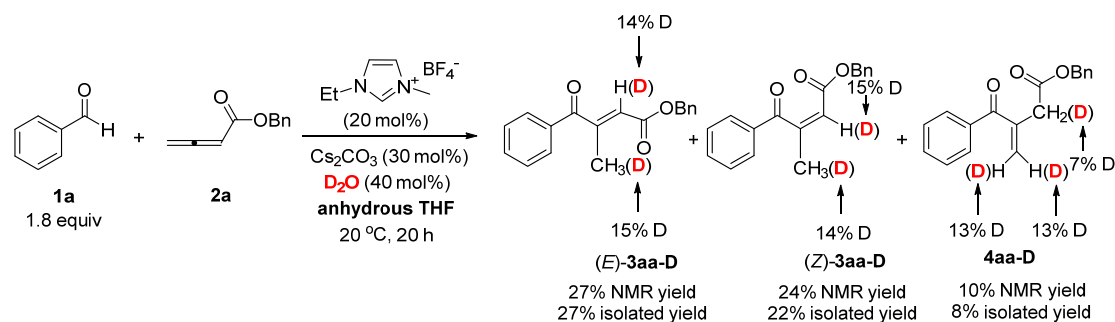

Following **Typical Procedure I**, the reaction of  $\text{Cs}_2\text{CO}_3$  (0.0980 g, 0.3 mmol), 1-ethyl-3-methylimidazolium tetrafluoroborate (0.0398 g, 0.2 mmol)/anhydrous THF (5 mL), benzaldehyde **1a** (0.1910 g, 1.8 mmol)/anhydrous THF (2.5 mL), **2a** (0.1745 g, 1 mmol)/anhydrous THF (2.5 mL), and  $\text{D}_2\text{O}$  (7.2  $\mu\text{L}$ ,  $d = 1.107 \text{ g/mL}$ , 0.0079 g, 0.4 mmol) at 20 °C for 20 h afforded (*E*)-**3aa-D** (0.0756 g, 27%), **4aa-D** (0.0224 g, 8%), and (*Z*)-**3aa-D** (0.0616 g, 22%) (The ratio of *E/Z* was ~53/47 and ~10% of **4aa-D** was detected by NMR analysis of the crude product) (in the order of polarity in silica gel column) after chromatography on silica gel (eluent: petroleum ether (60-90 °C)/ethyl

ether = 40/1 (1500 mL) to 30/1 (500 mL) to 10/1 (300 mL)).

(*E*)-**3aa-D**, the least polar isomer, liquid:  $^1\text{H}$  NMR (300 MHz,  $\text{CDCl}_3$ )  $\delta$  7.84-7.73 (m, 2H, ArH), 7.62-7.53 (m, 1H, ArH), 7.50-7.41 (m, 2H, ArH), 7.40-7.27 (m, 5H, ArH), 5.21 (s, 2H,  $\text{CH}_2$ ); the following signals is discernible for (*E*)-**3aa**:  $\delta$  6.24-6.15 (m, 0.86H,  $=\text{CH}$ ), 2.49-2.35 (m, 2.55H,  $\text{CH}_3$ ).

**4aa-D**, the second polar isomer, liquid:  $^1\text{H}$  NMR (300 MHz,  $\text{CDCl}_3$ )  $\delta$  7.82-7.72 (m, 2H, ArH), 7.58-7.49 (m, 1H, ArH), 7.46-7.37 (m, 2H, ArH), 7.37-7.26 (m, 5H, ArH), 5.12 (s, 2H,  $\text{CH}_2$ ); the following signals is discernible for **4aa**:  $\delta$  6.03-5.95 (m, 0.87H, one proton from  $=\text{CH}_2$ ), 5.82-5.73 (m, 0.87H, one proton from  $=\text{CH}_2$ ), 3.64-3.55 (m, 1.86H,  $\text{CH}_2$ ).

(*Z*)-**3aa-D**, the most polar isomer, liquid:  $^1\text{H}$  NMR (300 MHz,  $\text{CDCl}_3$ )  $\delta$  7.92-7.85 (m, 2H, ArH), 7.63-7.53 (m, 1H, ArH), 7.49-7.38 (m, 2H, ArH), 7.35-7.23 (m, 3H, ArH), 7.19-7.09 (m, 2H, ArH), 4.96 (s, 2H,  $\text{CH}_2$ ); the following signals is discernible for (*Z*)-**3aa**:  $\delta$  6.12-6.01 (m, 0.85H,  $=\text{CH}$ ), 2.18-2.08 (m, 2.57H,  $\text{CH}_3$ ).

(2.5) The reaction of **1a** and **2a** in a mixed anhydrous solvent of  $\text{CHCl}_3$  (70% v)/ $\text{CDCl}_3$  (30% v). (hx-16-144)

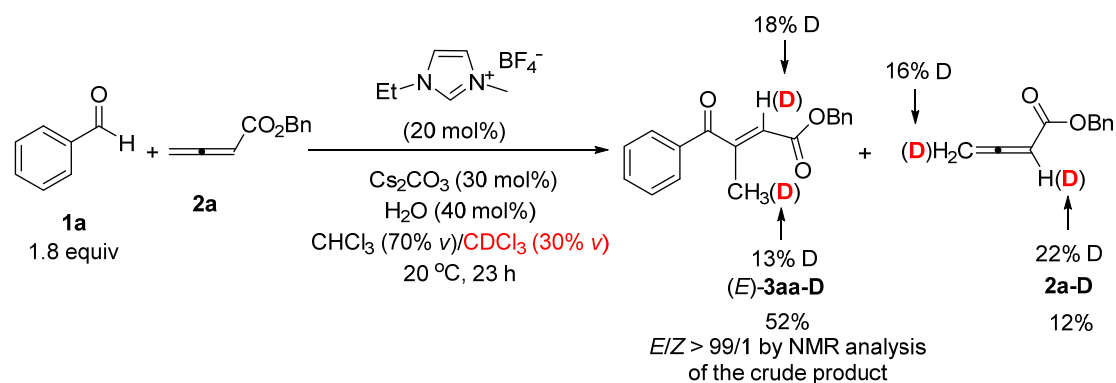

Following **Typical Procedure I**, the reaction of  $\text{Cs}_2\text{CO}_3$  (0.0490 g, 0.15 mmol),

1-ethyl-3-methylimidazolium tetrafluoroborate (0.0197 g, 0.10 mmol), benzaldehyde **1a** (0.0961 g, 0.9 mmol), **2a** (0.0869 g, 0.5 mmol), and H<sub>2</sub>O (3.6  $\mu$ L, d = 1.000 g/mL, 0.0036 g, 0.2 mmol) in a mixed anhydrous solvent of CHCl<sub>3</sub> (3.5 mL)/CDCl<sub>3</sub> (1.5 mL) at 20 °C for 23 h afforded **2a-D** (0.0101 g, 12%) and (*E*)-**3aa-D** (0.0735 g, 52%) (petroleum ether (60-90 °C)/ethyl acetate = 50/1 (500 mL)) (the ratio of *E/Z* was >99/1 by NMR analysis of the crude product) (in the order of polarity in silica gel column).

**2a-D**, liquid: <sup>1</sup>H NMR (300 MHz, CDCl<sub>3</sub>)  $\delta$  7.43-7.28 (m, 5H, ArH), 5.20 (s, 2H, CH<sub>2</sub>); the following signals is discernible for **2a**:  $\delta$  5.72-5.65 (m, 0.78H, =CH), 5.27-5.21 (m, 1.68H, =CH<sub>2</sub>).

(*E*)-**3aa-D**, liquid: <sup>1</sup>H NMR (300 MHz, CDCl<sub>3</sub>)  $\delta$  7.83-7.72 (m, 2H, ArH), 7.62-7.52 (m, 1H, ArH), 7.49-7.41 (m, 2H, ArH), 7.40-7.27 (m, 5H, ArH), 5.21 (s, 2H, CH<sub>2</sub>); the following signals is discernible for (*E*)-**3aa**:  $\delta$  6.25-6.15 (m, 0.82H, =CH), 2.49-2.36 (m, 2.62H, CH<sub>3</sub>).

(2.6) The reaction of **1a** and **2a** in a mixed anhydrous solvent of CHCl<sub>3</sub> (30% v)/CDCl<sub>3</sub> (70% v). (hx-16-145)

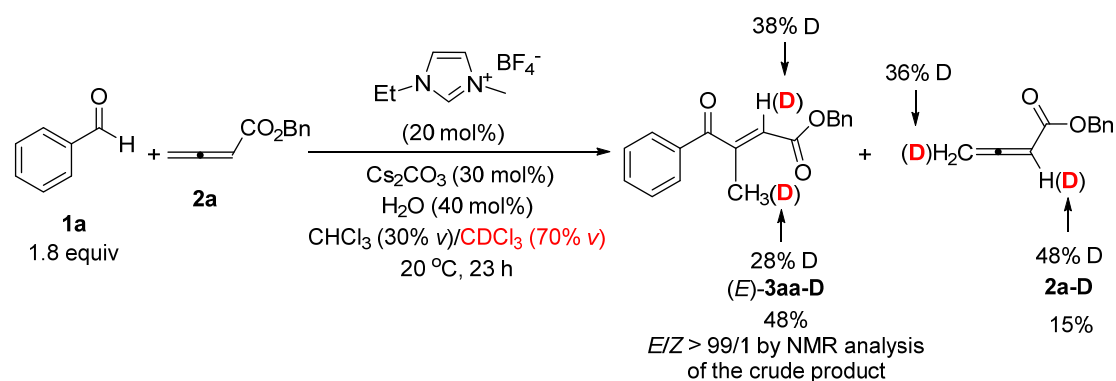

Following **Typical Procedure I**, the reaction of Cs<sub>2</sub>CO<sub>3</sub> (0.0492 g, 0.15 mmol),

1-ethyl-3-methylimidazolium tetrafluoroborate (0.0196 g, 0.10 mmol), benzaldehyde **1a** (0.0959 g, 0.9 mmol), **2a** (0.0868 g, 0.5 mmol), and H<sub>2</sub>O (3.6 μL, d = 1.000 g/mL, 0.0036 g, 0.2 mmol) in a mixed anhydrous solvent of CHCl<sub>3</sub> (1.5 mL)/CDCl<sub>3</sub> (3.5 mL) at 20 °C for 23 h afforded **2a-D** (0.0134 g, 15%) and (*E*)-**3aa-D** (0.0680 g, 48%) (petroleum ether (60-90 °C)/ethyl acetate = 50/1 (500 mL)) (the ratio of *E/Z* was >99/1 by NMR analysis of the crude product) (in the order of polarity in silica gel column).

**2a-D**, liquid: <sup>1</sup>H NMR (300 MHz, CDCl<sub>3</sub>) δ 7.42-7.28 (m, 5H, ArH), 5.20 (s, 2H, CH<sub>2</sub>); the following signals is discernible for **2a**: δ 5.72-5.65 (m, 0.52H, =CH), 5.27-5.21 (m, 1.29H, =CH<sub>2</sub>).

(*E*)-**3aa-D**, liquid: <sup>1</sup>H NMR (300 MHz, CDCl<sub>3</sub>) δ 7.83-7.72 (m, 2H, ArH), 7.62-7.51 (m, 1H, ArH), 7.49-7.41 (m, 2H, ArH), 7.40-7.27 (m, 5H, ArH), 5.21 (s, 2H, CH<sub>2</sub>); the following signals is discernible for (*E*)-**3aa**: δ 6.23-6.16 (m, 0.62H, =CH), 2.48-2.36 (m, 2.16H, CH<sub>3</sub>).

(2.7) The reaction of **1a** and **2a** in anhydrous CDCl<sub>3</sub>. (mdk-11-089)

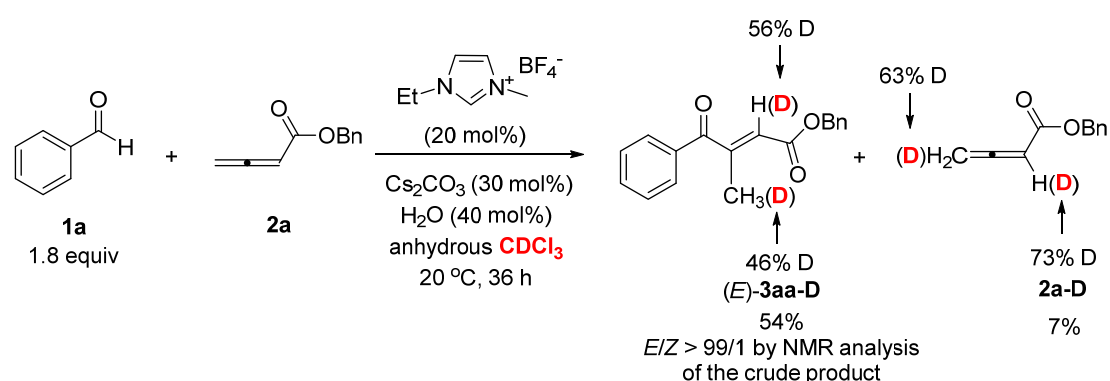

Following **Typical Procedure I**, the reaction of Cs<sub>2</sub>CO<sub>3</sub> (0.0390 g, 0.12 mmol), 1-ethyl-3-methylimidazolium tetrafluoroborate (0.0164 g, 0.08 mmol)/anhydrous

CDCl<sub>3</sub> (2 mL), benzaldehyde **1a** (0.0759 g, 0.72 mmol)/anhydrous CDCl<sub>3</sub> (1 mL), **2a** (0.0698 g, 0.4 mmol)/anhydrous CDCl<sub>3</sub> (1 mL), and H<sub>2</sub>O (2.9 μL, d = 1.000 g/mL, 0.0029 g, 0.16 mmol) at 20 °C for 36 h afforded **2a-D** (0.0048 g, 7%) and (*E*)-**3aa-D** (0.0611 g, 54%) (petroleum ether/ethyl acetate = 50/1 (400 mL × 2)) (the ratio of *E/Z* was >99/1 by NMR analysis of the crude product) (in the order of polarity in silica gel column).

**2a-D**, liquid: <sup>1</sup>H NMR (300 MHz, CDCl<sub>3</sub>) δ 7.43-7.28 (m, 5H, ArH), 5.20 (s, 2H, CH<sub>2</sub>); the following signals is discernible for **2a**: δ 5.72-5.67 (m, 0.27H, =CH), 5.27-5.21 (m, 0.74H, =CH<sub>2</sub>); IR (neat) ν (cm<sup>-1</sup>) 3090, 3066, 3033, 2955, 2892, 2308, 2263, 2215, 1927, 1722, 1715, 1587, 1498, 1456, 1386, 1379, 1356, 1318, 1294, 1258, 1216, 1173, 1081, 1016; MS (ESI) *m/z* (%) 200 ([M(D<sub>3</sub>) + Na]<sup>+</sup>), 199 ([M(D<sub>2</sub>) + Na]<sup>+</sup>), 198 ([M(D) + Na]<sup>+</sup>), 197 ([M + Na]<sup>+</sup>), 178 ([M(D<sub>3</sub>) + H]<sup>+</sup>), 177 ([M(D<sub>2</sub>) + H]<sup>+</sup>), 176 ([M(D) + H]<sup>+</sup>), 175 ([M + H]<sup>+</sup>); HRMS calcd. for C<sub>11</sub>H<sub>8</sub>D<sub>3</sub>O<sub>2</sub> ([M(D)<sub>3</sub> + H]<sup>+</sup>): 178.0942, found: 178.0935, C<sub>11</sub>H<sub>9</sub>D<sub>2</sub>O<sub>2</sub> ([M(D)<sub>2</sub> + H]<sup>+</sup>): 177.0879, found: 177.0876, C<sub>11</sub>H<sub>10</sub>DO<sub>2</sub> ([M(D) + H]<sup>+</sup>): 176.0816, found: 176.0811, C<sub>11</sub>H<sub>11</sub>O<sub>2</sub> ([M + H]<sup>+</sup>): 175.0754, found: 175.0754.

(*E*)-**3aa-D**, liquid: <sup>1</sup>H NMR (300 MHz, CDCl<sub>3</sub>) δ 7.82-7.71 (m, 2H, ArH), 7.61-7.53 (m, 1H, ArH), 7.49-7.40 (m, 2H, ArH), 7.40-7.27 (m, 5H, ArH), 5.21 (s, 2H, CH<sub>2</sub>); the following signals is discernible for (*E*)-**3aa**: δ 6.23-6.16 (m, 0.44H, =CH), 2.47-2.36 (m, 1.61H, CH<sub>3</sub>); IR (neat) ν (cm<sup>-1</sup>) 3064, 3034, 2954, 1722, 1662, 1597, 1580, 1498, 1448, 1377, 1352, 1318, 1265, 1231, 1180, 1025, 1002; MS (ESI) *m/z* (%) 307 ([M(D<sub>4</sub>) + Na]<sup>+</sup>), 306 ([M(D<sub>3</sub>) + Na]<sup>+</sup>), 305 ([M(D<sub>2</sub>) + Na]<sup>+</sup>), 304 ([M(D) + Na]<sup>+</sup>),

303 ( $[M + Na]^+$ ), 302 ( $[M(D_4) + NH_4]^+$ ), 301 ( $[M(D_3) + NH_4]^+$ ), 300 ( $[M(D_2) + NH_4]^+$ ), 299 ( $[M(D) + NH_4]^+$ ), 298 ( $[M + NH_4]^+$ ), 285 ( $[M(D_4) + H]^+$ ), 284 ( $[M(D_3) + H]^+$ ), 283 ( $[M(D_2) + H]^+$ ), 282 ( $[M(D) + H]^+$ ), 281 ( $[M + H]^+$ ); HRMS calcd. for  $C_{18}H_{13}D_4O_3$  ( $[M(D)_4 + H]^+$ ): 285.1423, found: 285.1418,  $C_{18}H_{14}D_3O_3$  ( $[M(D)_3 + H]^+$ ): 284.1361, found: 284.1361,  $C_{18}H_{15}D_2O_3$  ( $[M(D)_2 + H]^+$ ): 283.1298, found: 283.1294,  $C_{18}H_{16}DO_3$  ( $[M(D) + H]^+$ ): 282.1235, found: 282.1237,  $C_{18}H_{17}O_3$  ( $[M + H]^+$ ): 281.1172, found: 281.1175.

### (3) SAESI-MS experiments

SAESI-MS spectra were recorded on a Finnigan TSQ (Thermo Finnigan, Quantum Access TM) triple-quadrupole mass spectrometer equipped with a home-made SAESI ion source in positive mode. The basic SAESI conditions were: vacuum,  $2.8 \times 10^{-6}$  torr; spray voltage, 3000 V; capillary temperature, 275°C; sheath gas pressure of two sprayers, 2 arb. units; the collision energy of CID, 25 eV. Data acquisition and analysis were done with the Xcalibur (version 2.0, Thermoquest Finnigan) software package.

The reaction solutions were injected by a 500- $\mu$ L air-tight syringe with a speed at 5  $\mu$ L/min to SAESI-MS. The assisted solvent of MeOH or anhydrous acetonitrile was injected by another 500- $\mu$ L air-tight syringe with a speed at 5  $\mu$ L/min to SAESI-MS.

#### (3.1) SAESI-MS experiments in anhydrous $CHCl_3$ after 10 min (mdk-11-128)

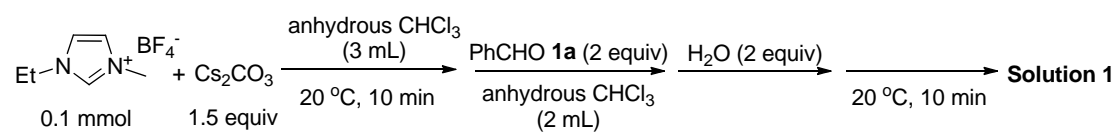

**Typical Procedure II:** To a dry Schlenk tube was added  $\text{Cs}_2\text{CO}_3$  (0.0490 g, 0.15 mmol) in a glove box. Then 1-ethyl-3-methylimidazolium tetrafluoroborate (0.0203 g,

0.1 mmol) and anhydrous  $\text{CHCl}_3$  (3 mL) were added sequentially under Ar atmosphere. The resulting mixture was stirred at 20 °C. After 10 min, **1a** (20.3  $\mu\text{L}$ , d = 1.044 g/mL, 0.0212 g, 0.2 mmol), anhydrous  $\text{CHCl}_3$  (2 mL), and  $\text{H}_2\text{O}$  (3.6  $\mu\text{L}$ , d = 1.000 g/mL, 0.0036 g, 0.2 mmol) were added sequentially. The resulting mixture was stirred at 20 °C. After 10 min, the reaction **solution 1** was submitted to SAESI-MS analysis.

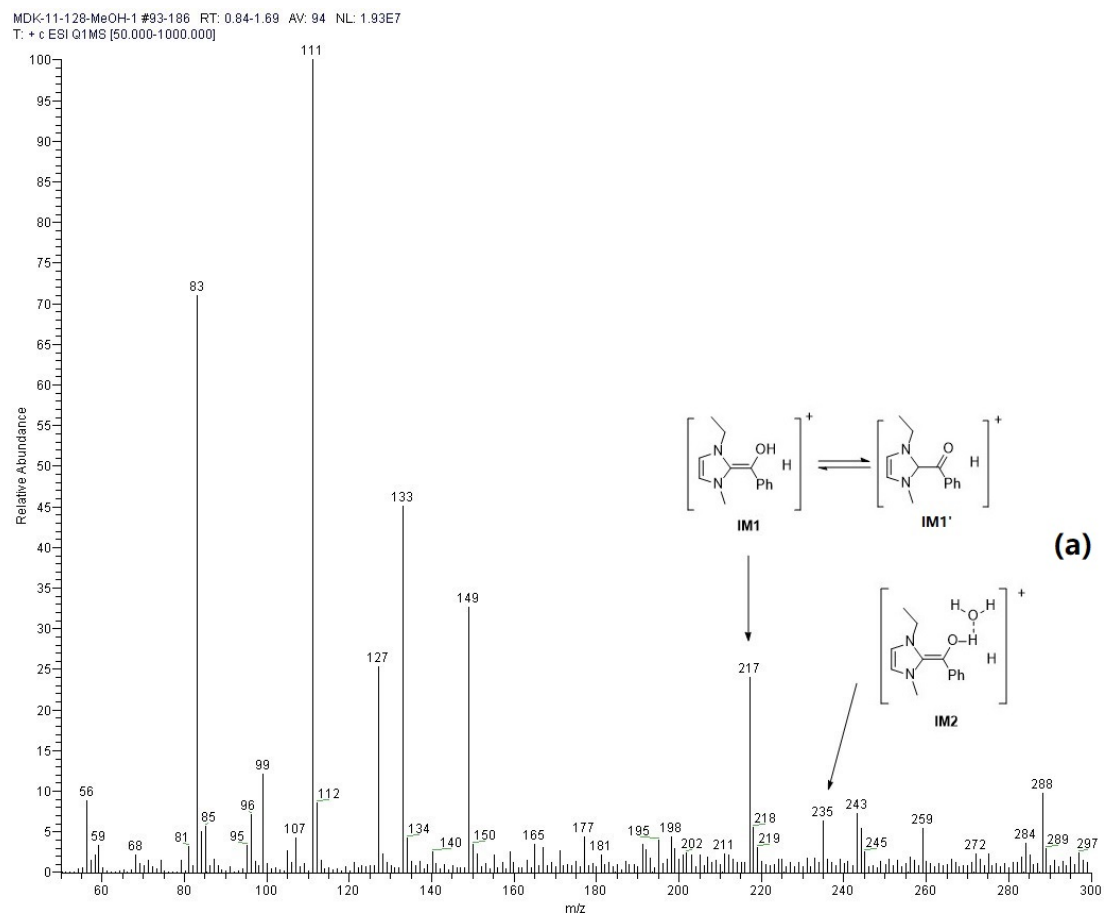



MDK-11-128-MeOH-1 #413-478 RT: 3.81-4.42 AV: 66 NL: 2.97E6  
T: + c ESI Full ms2 217.000 [50.000-300.000]

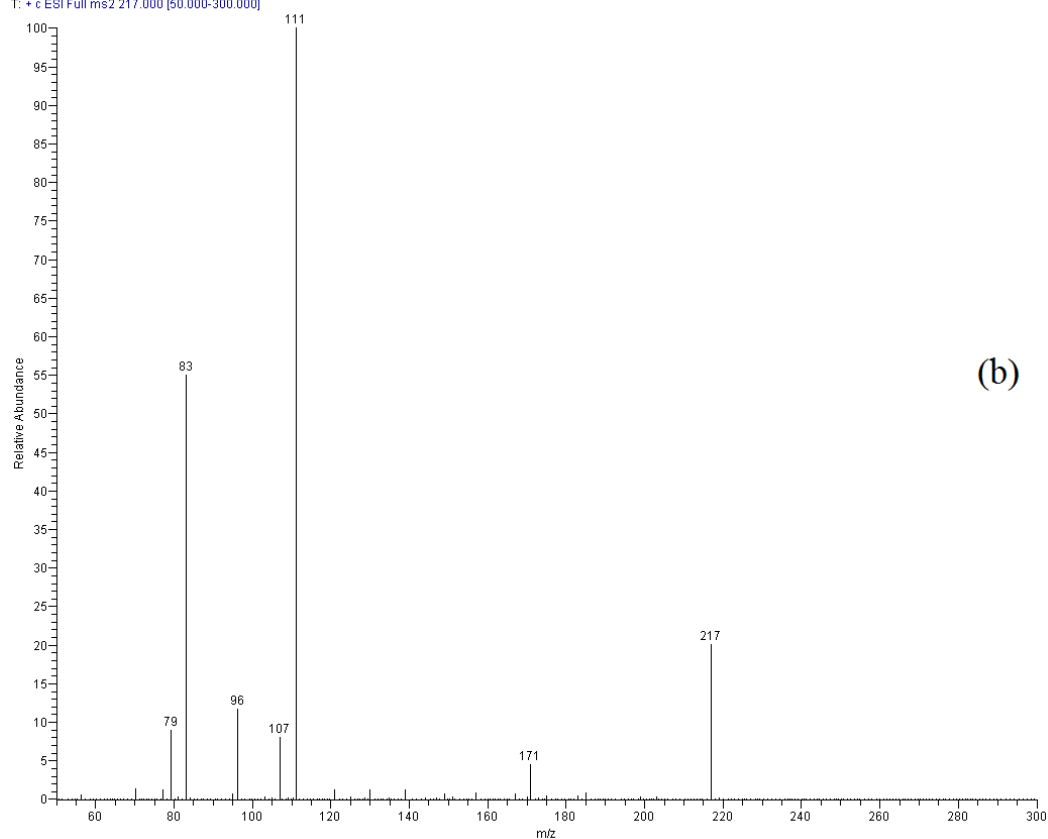

(b)

MDK-11-128-MeOH-1 #259-334 RT: 2.37-3.07 AV: 76 NL: 2.69E4  
T: + c ESI Full ms2 235.000 [50.000-300.000]

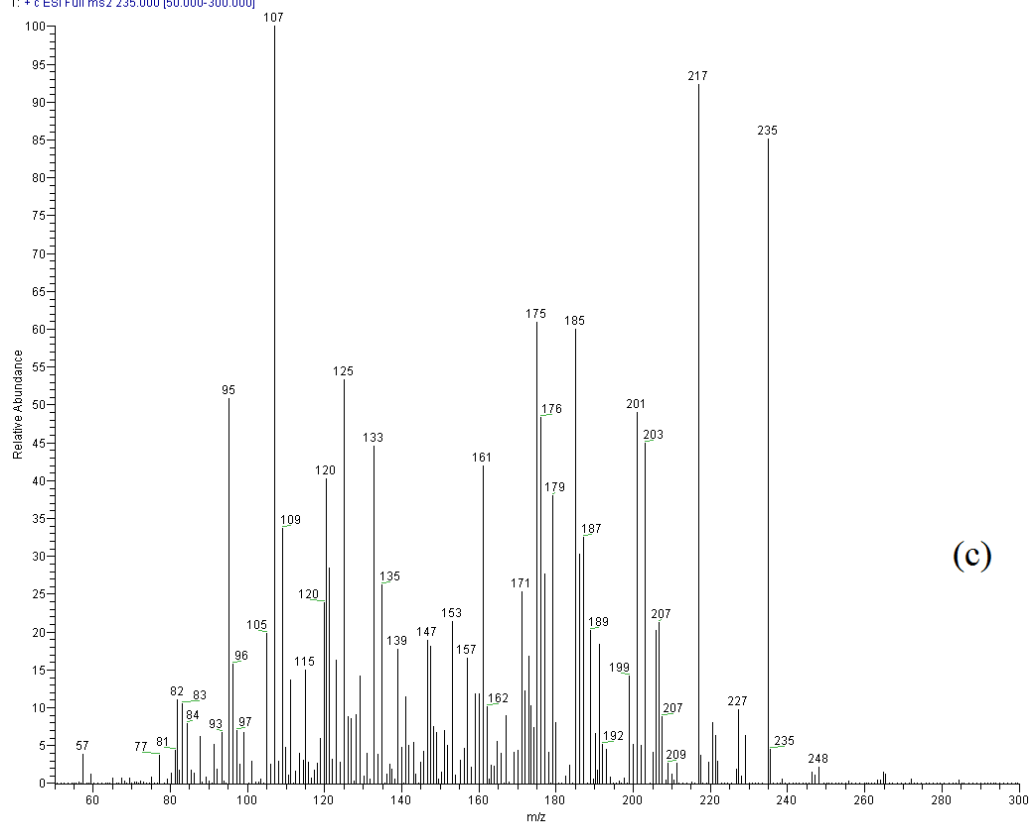

(c)

Figure S1. (a) SAESI-MS spectrum of the reaction **solution 1** using MeOH as the assisted solvent. (b) The SAESI-MS/MS spectra of the ion at  $m/z$  217. (c) The SAESI-MS/MS spectra of the ion at  $m/z$  235.

**Table S2. Signal intensities of the target ions in Figure S1**

| $m/z$ | Intensity |
|-------|-----------|
| 217   | 4620347.8 |
| 218   | 1059949.9 |
| 235   | 1220695.5 |

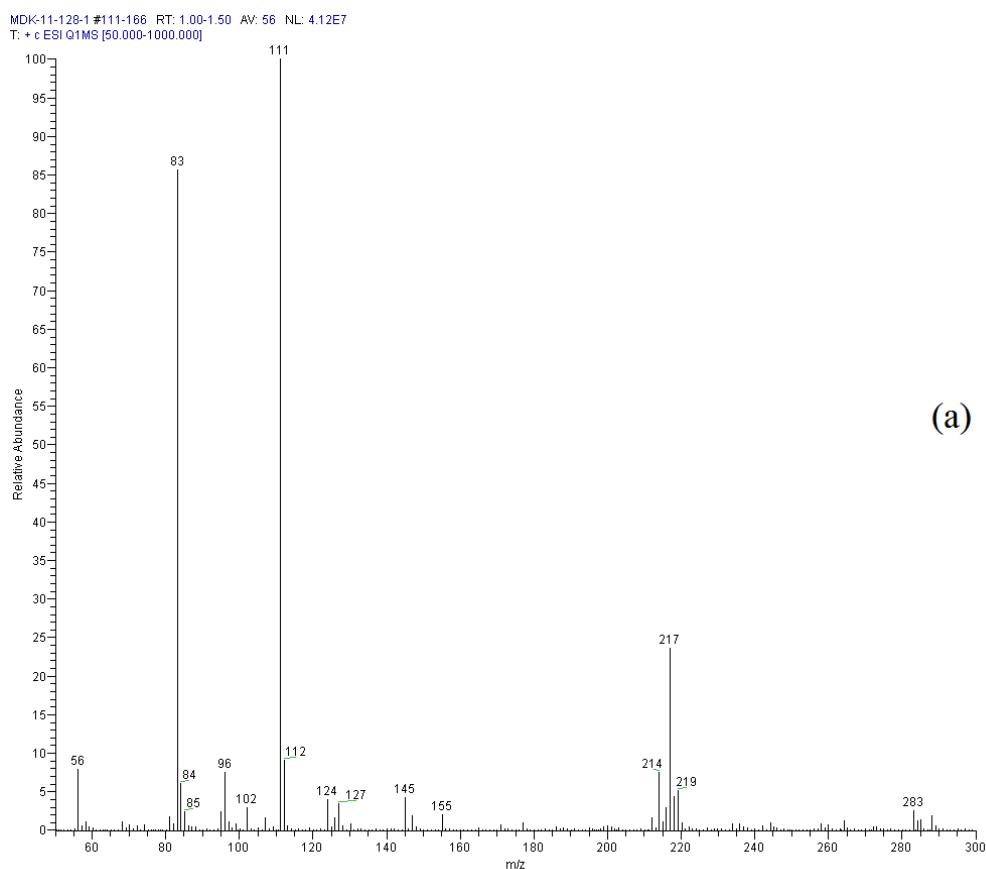

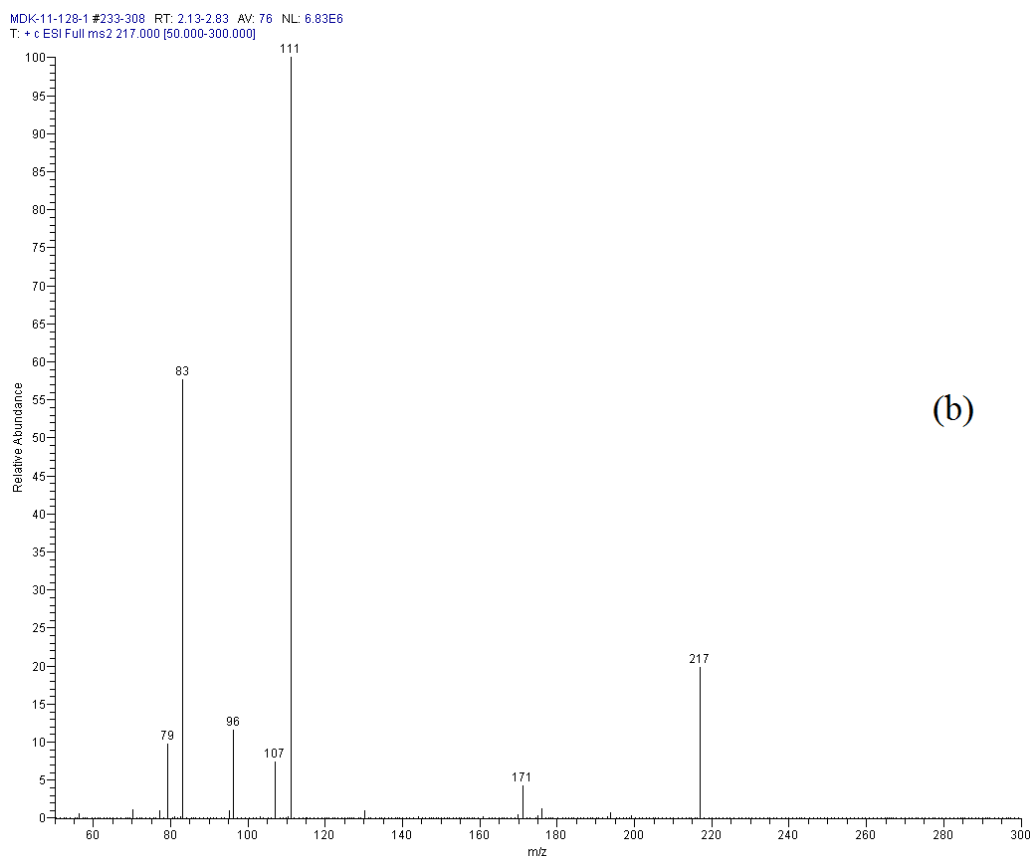

Figure S2. (a) SAESI-MS spectrum of the reaction **solution 1** using anhydrous acetonitrile as the assisted solvent. (b) The SAESI-MS/MS spectra of the ion at  $m/z$  217.

**Table S3. Signal intensities of the target ions in Figure S2**

| $m/z$ | Intensity |
|-------|-----------|
| 217   | 9740060.5 |
| 218   | 1782792.5 |
| 219   | 2152750.9 |

### (3.2) SAESI-MS experiments in $\text{CDCl}_3$ after 10 min (mdk-11-121)

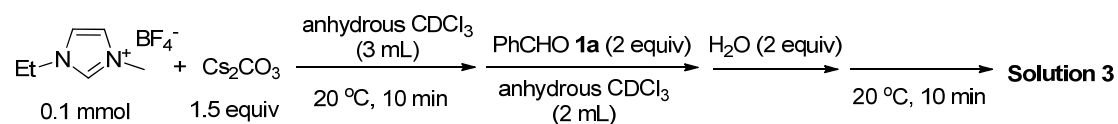

Following **Typical Procedure II**, the reaction of  $\text{Cs}_2\text{CO}_3$  (0.0486 g, 0.15 mmol), 1-ethyl-3-methylimidazolium tetrafluoroborate (0.0202 g, 0.1 mmol)/anhydrous  $\text{CDCl}_3$  (3 mL), **1a** (0.0213 g, 0.2 mmol)/anhydrous  $\text{CDCl}_3$  (2 mL), and  $\text{H}_2\text{O}$  (3.6  $\mu\text{L}$ ,

d = 1.000 g/mL, 0.0036 g, 0.2 mmol) at 20 °C for 10 min afforded **solution 3**. Then the reaction **solution 3** was submitted to SAESI-MS analysis.

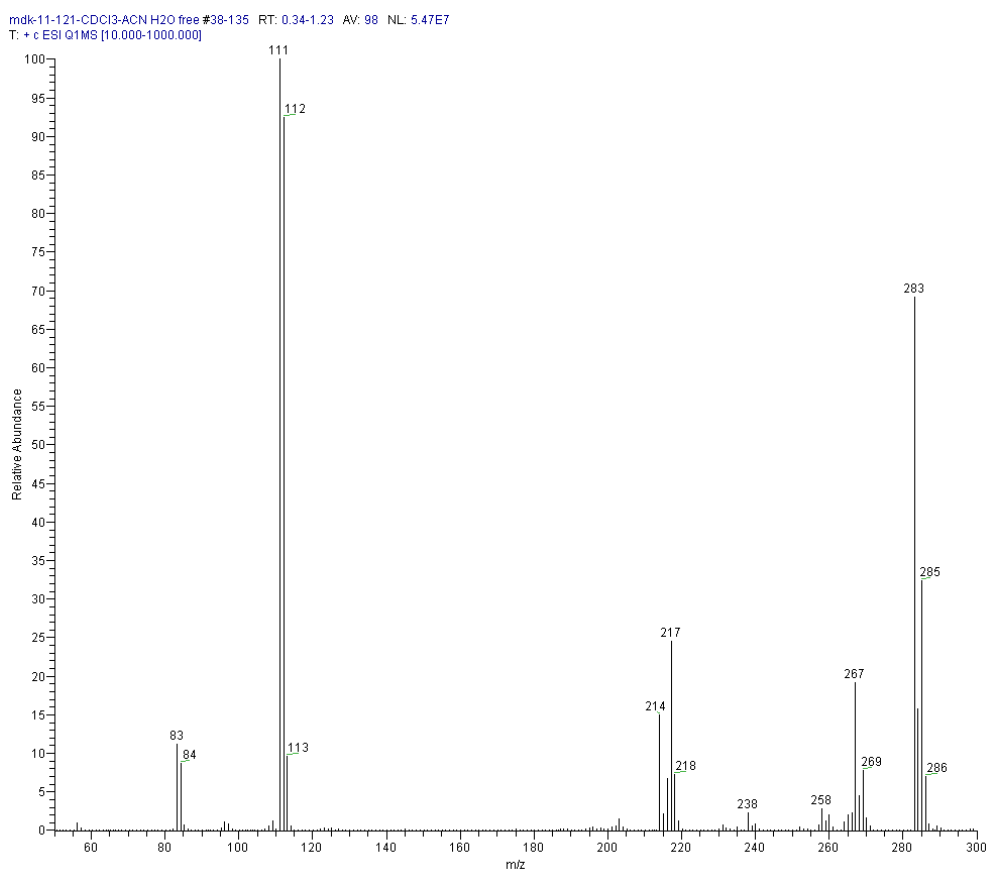

Figure S3. (a) SAESI-MS spectrum of the reaction **solution 3** using anhydrous acetonitrile as the assisted solvent.

**Table S4. Signal intensities of the target ions in Figure S3**

| <i>m/z</i> | Intensity  |
|------------|------------|
| 217        | 13404158.6 |
| 218        | 3948675.6  |

### (3.3) SAESI-MS experiments in CDCl<sub>3</sub> after 1 h (mdk-11-123)

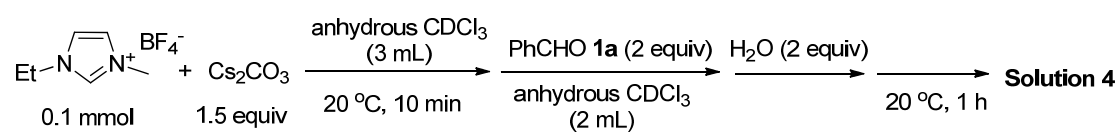

Following **Typical Procedure II**, the reaction of Cs<sub>2</sub>CO<sub>3</sub> (0.0490 g, 0.15 mmol), 1-ethyl-3-methylimidazolium tetrafluoroborate (0.0202 g, 0.1 mmol)/anhydrous

CDCl<sub>3</sub> (3 mL), **1a** (0.0210 g, 0.2 mmol)/anhydrous CDCl<sub>3</sub> (2 mL), and H<sub>2</sub>O (3.6 μL, d = 1.000 g/mL, 0.0036 g, 0.2 mmol) at 20 °C for 1 h afforded **solution 4**. Then the reaction **solution 4** was submitted to SAESI-MS analysis.

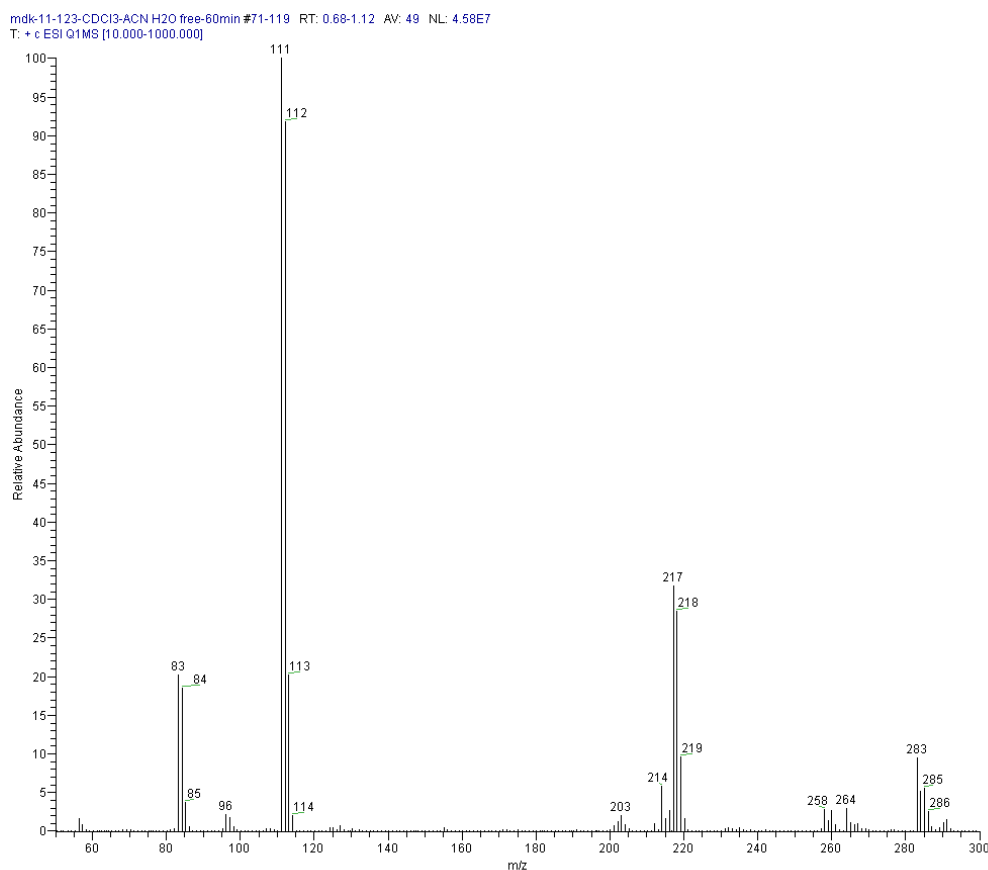

Figure S4. SAESI-MS spectrum of the reaction **solution 4** using anhydrous acetonitrile as the assisted solvent.

Table S5. Signal intensities of the target ions in Figure S4

| <i>m/z</i> | Intensity  |
|------------|------------|
| 217        | 14555928.5 |
| 218        | 13012113.7 |
| 219        | 4381850.3  |

### (3.4) SAESI-MS experiments in CDCl<sub>3</sub> after 2 h (mdk-11-124)

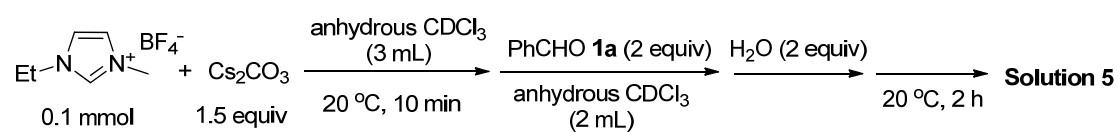

Following **Typical Procedure II**, the reaction of Cs<sub>2</sub>CO<sub>3</sub> (0.0485 g, 0.15 mmol), 1-ethyl-3-methylimidazolium tetrafluoroborate (0.0203 g, 0.1 mmol)/anhydrous CDCl<sub>3</sub> (3 mL), **1a** (20.3 μL, d = 1.044 g/mL, 0.0212 g, 0.2 mmol)/anhydrous CDCl<sub>3</sub> (2 mL), and H<sub>2</sub>O (3.6 μL, d = 1.000 g/mL, 0.0036 g, 0.2 mmol) at 20 °C for 2 h afforded **solution 5**. Then the reaction **solution 5** was submitted to SAESI-MS analysis.

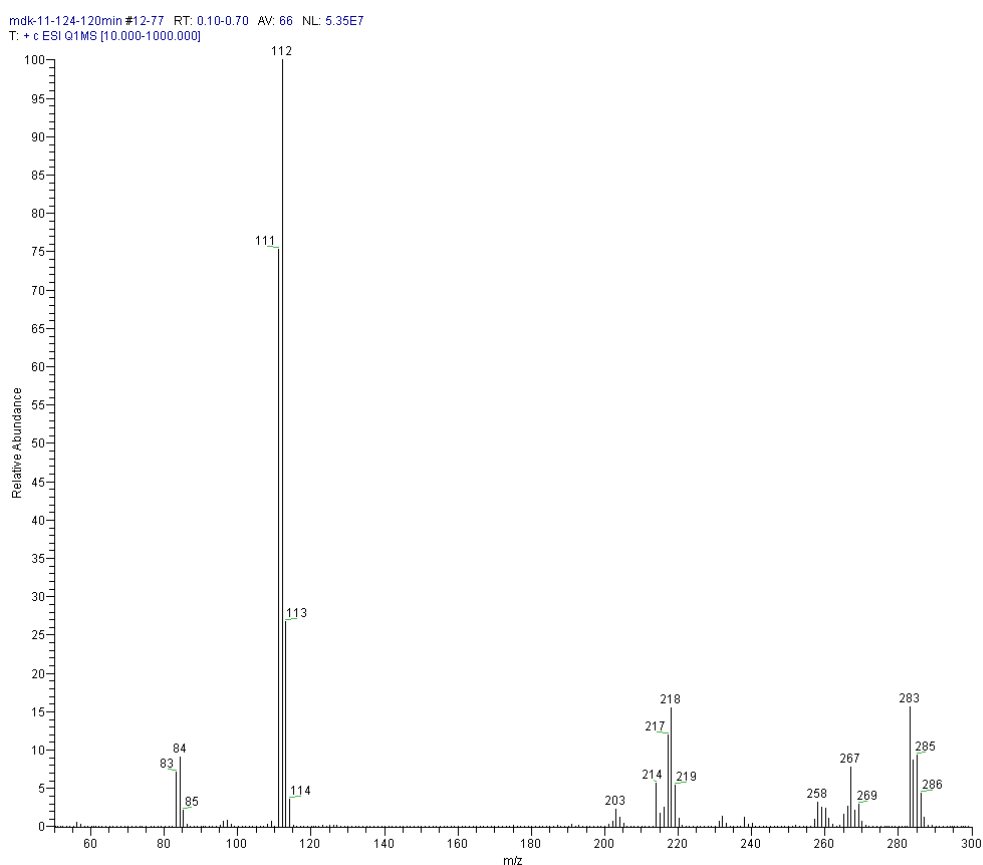

Figure S5. SAESI-MS spectrum of the reaction **solution 5** using anhydrous acetonitrile as the assisted solvent.

**Table S6. Signal intensities of the target ions in Figure S5**

| <i>m/z</i> | Intensity |
|------------|-----------|
| 217        | 6390120.8 |
| 218        | 8300253.3 |
| 219        | 2914590.8 |

### (3.5) SAESI-MS experiments in CDCl<sub>3</sub> after 3 h (mdk-11-125)

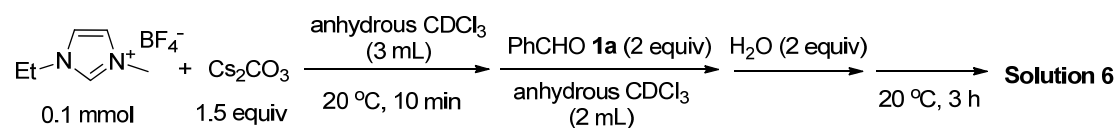

Following **Typical Procedure II**, the reaction of Cs<sub>2</sub>CO<sub>3</sub> (0.0492 g, 0.15 mmol), 1-ethyl-3-methylimidazolium tetrafluoroborate (0.0203 g, 0.1 mmol)/anhydrous CDCl<sub>3</sub> (3 mL), **1a** (20.3 μL, d = 1.044 g/mL, 0.0212 g, 0.2 mmol)/anhydrous CDCl<sub>3</sub> (2 mL), and H<sub>2</sub>O (3.6 μL, d = 1.000 g/mL, 0.0036 g, 0.2 mmol) at 20 °C for 3 h afforded **solution 6**. Then the reaction **solution 6** was submitted to SAESI-MS analysis.

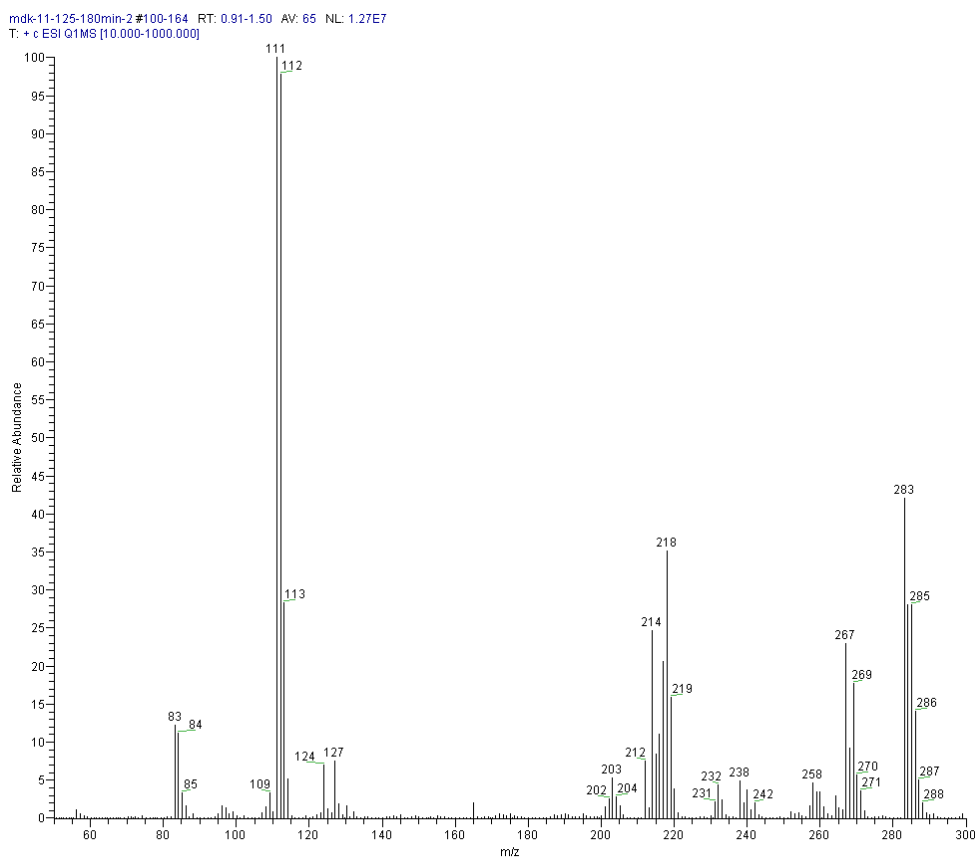

Figure S6. SAESI-MS spectrum of the reaction **solution 6** using anhydrous acetonitrile as the assisted solvent.

**Table S7. Signal intensities of the target ions in Figure S6**

| <i>m/z</i> | Intensity |
|------------|-----------|
| 217        | 2627898.1 |
| 218        | 4468922.0 |
| 219        | 2015608.7 |

**(3.6) SAESI-MS experiments in CDCl<sub>3</sub> after 4 h (mdk-11-126)**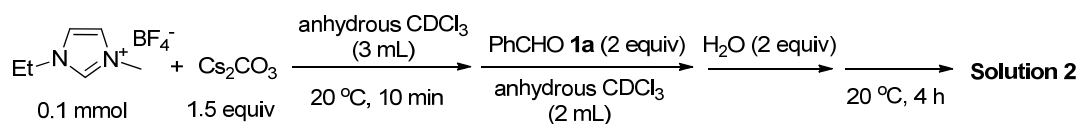

Following **Typical Procedure II**, the reaction of Cs<sub>2</sub>CO<sub>3</sub> (0.0491 g, 0.15 mmol), 1-ethyl-3-methylimidazolium tetrafluoroborate (0.0203 g, 0.1 mmol)/anhydrous CDCl<sub>3</sub> (3 mL), **1a** (20.3 μL, d = 1.044 g/mL, 0.0212 g, 0.2 mmol)/anhydrous CDCl<sub>3</sub> (2 mL), and H<sub>2</sub>O (3.6 μL, d = 1.000 g/mL, 0.0036 g, 0.2 mmol) at 20 °C for 4 h afforded **solution 2**. Then the reaction **solution 2** was submitted to SAESI-MS analysis.



mdk-11-126-240min #45-142 RT: 0.41-1.30 AV: 98 NL: 4.34E7  
T: + c ESI Q1MS [10.000-1000.000]

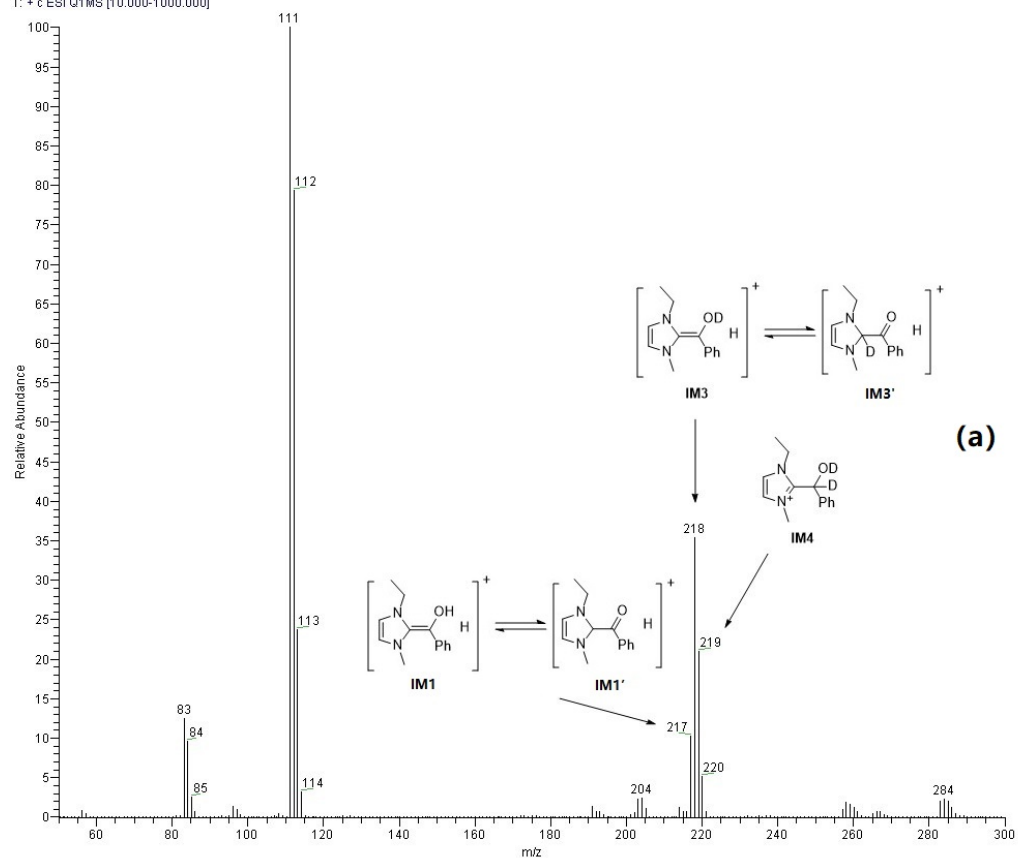

mdk-11-126-240min #192-231 RT: 1.76-2.13 AV: 40 NL: 1.29E8  
T: + c ESI Full ms2 217.200 [10.000-300.000]

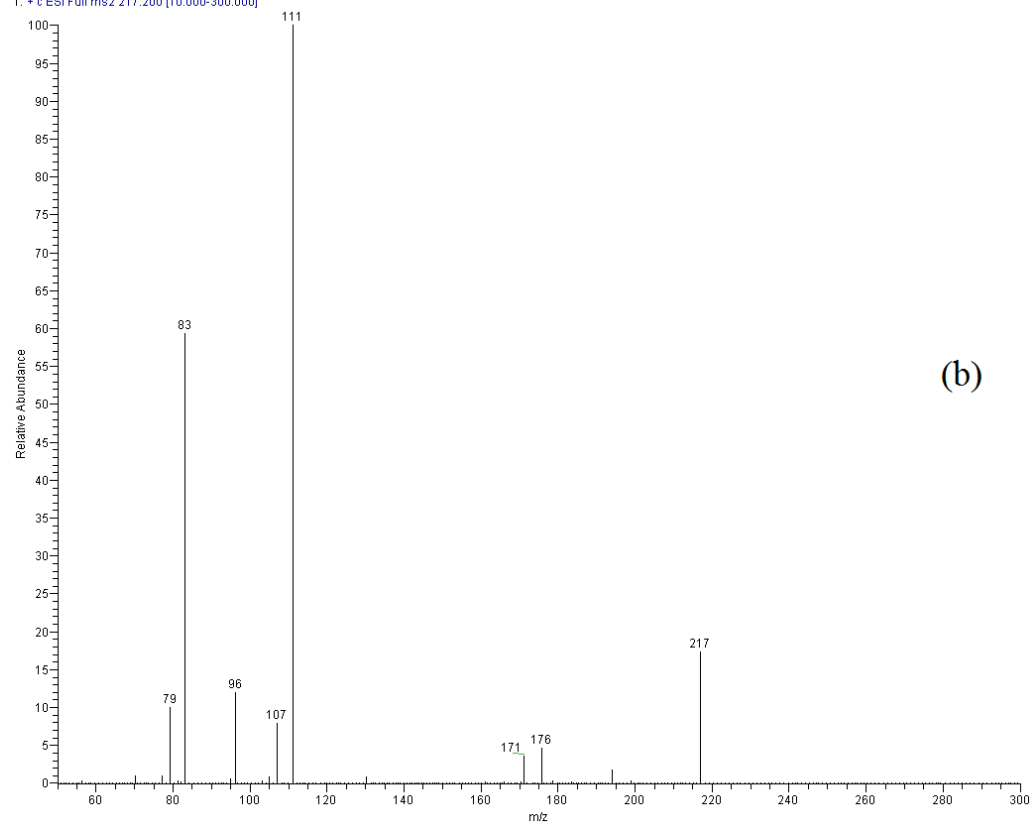

mdk-11-126-240min-2#277-346 RT: 2.56-3.21 AV: 70 NL: 3.63E6  
T: + c ESI Full ms2 218.200 [10.000-300.000]

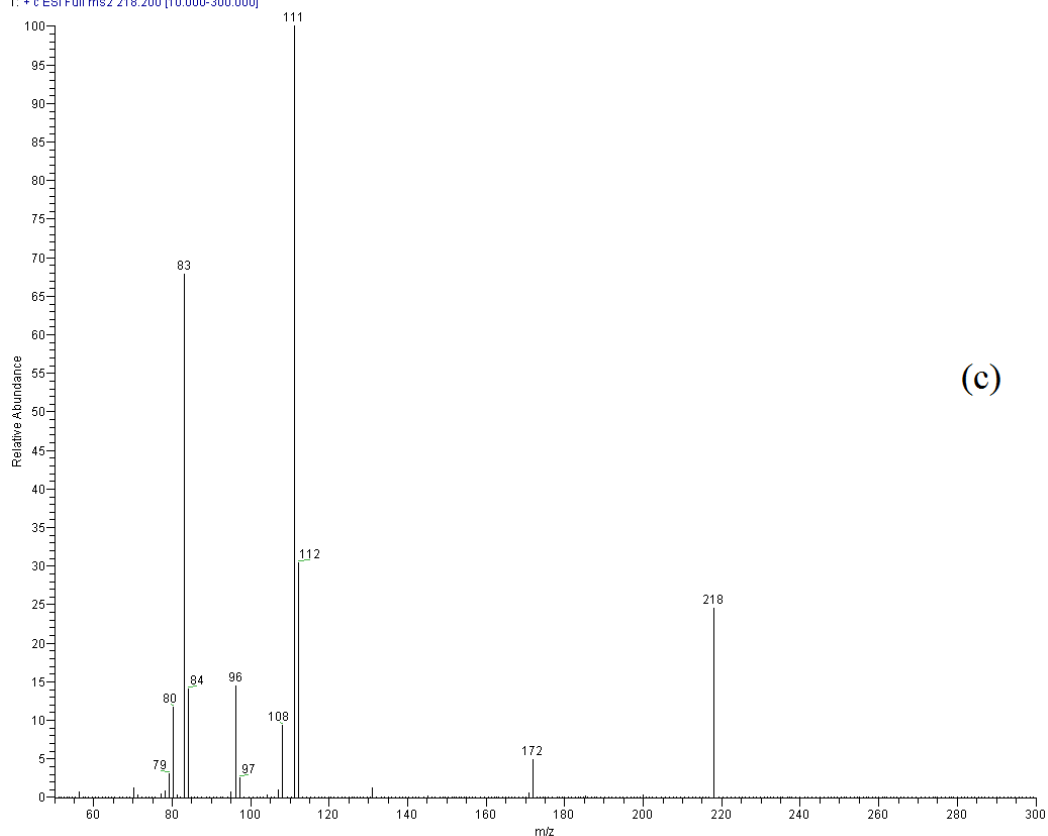

(c)

mdk-11-126-240min-2#39-61 RT: 0.26-0.56 AV: 33 NL: 2.04E6  
T: + c ESI Full ms2 219.200 [10.000-300.000]

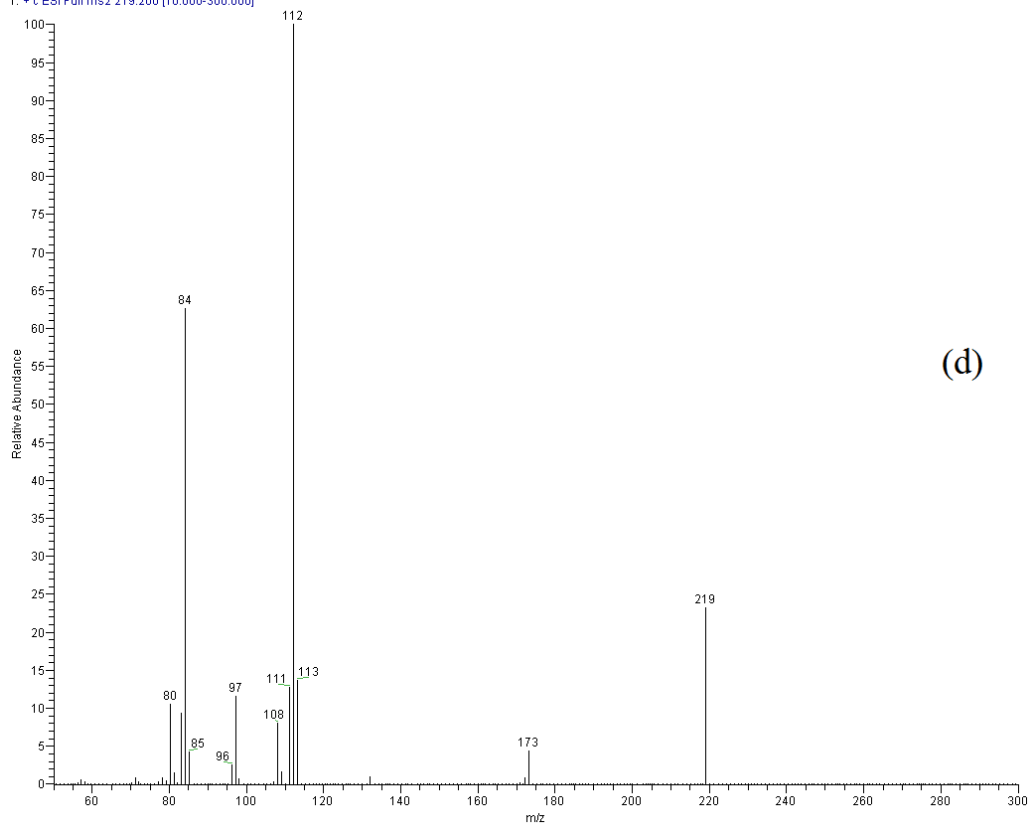

(d)

Figure S7. (a) SAESI-MS spectrum of the reaction **solution 2** using anhydrous acetonitrile as the assisted solvent. (b) The SAESI-MS/MS spectra of the ion at  $m/z$  217. (c) The SAESI-MS/MS spectra of the ion at  $m/z$  218. (d) The SAESI-MS/MS spectra of the ion at  $m/z$  219.

**Table S8. Signal intensities of the target ions in Figure S7**

| $m/z$ | Intensity  |
|-------|------------|
| 217   | 4462860.3  |
| 218   | 15348270.8 |
| 219   | 9134749.2  |

**(3.7) SAESI-MS experiments in CDCl<sub>3</sub> after 5 h (mdk-11-127)**

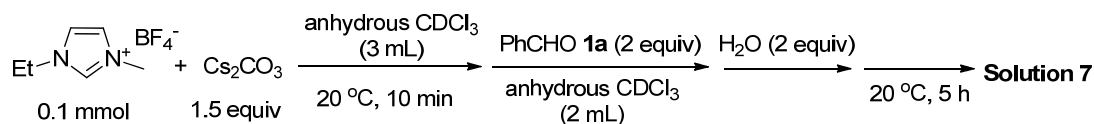

Following **Typical Procedure II**, the reaction of Cs<sub>2</sub>CO<sub>3</sub> (0.0485 g, 0.15 mmol), 1-ethyl-3-methylimidazolium tetrafluoroborate (0.0202 g, 0.1 mmol)/anhydrous CDCl<sub>3</sub> (3 mL), **1a** (20.3 μL, d = 1.044 g/mL, 0.0212 g, 0.2 mmol)/anhydrous CDCl<sub>3</sub> (2 mL), and H<sub>2</sub>O (3.6 μL, d = 1.000 g/mL, 0.0036 g, 0.2 mmol) at 20 °C for 5 h afforded **solution 7**. Then the reaction **solution 7** was submitted to SAESI-MS analysis.

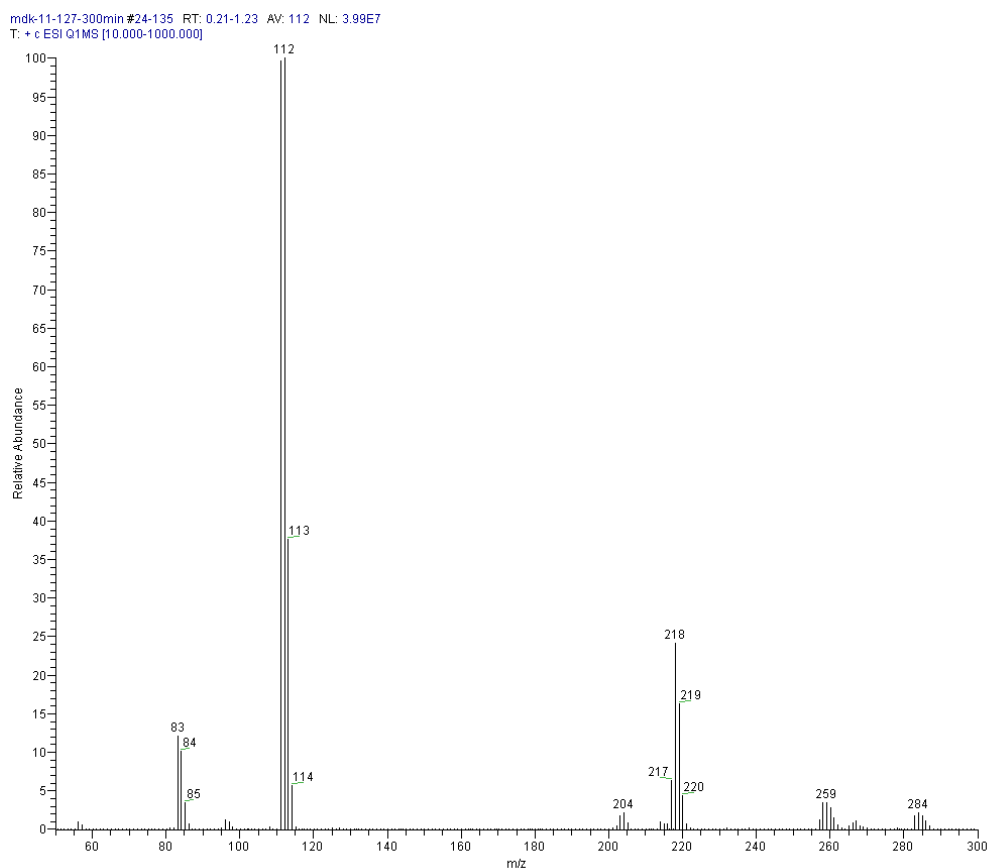

Figure S8. SAESI-MS spectrum of the reaction **solution 7** using anhydrous acetonitrile as the assisted solvent.

**Table S9. Signal intensities of the target ions in Figure S8**

| <i>m/z</i> | Intensity |
|------------|-----------|
| 217        | 2550729.0 |
| 218        | 9619641.8 |
| 219        | 6516477.7 |

### 3. Highly stereoselective preparation of (*E*)-4-oxo-2-butenates (*E*)-3aa-(*E*)-3la

The following compounds were prepared according to **Typical Procedure I**.

#### (1) Benzyl 3-methyl-4-oxo-4-phenylbut-2(*E*)-enoate ((*E*)-3aa) (mdk-10-189-1, mdk-11-082)

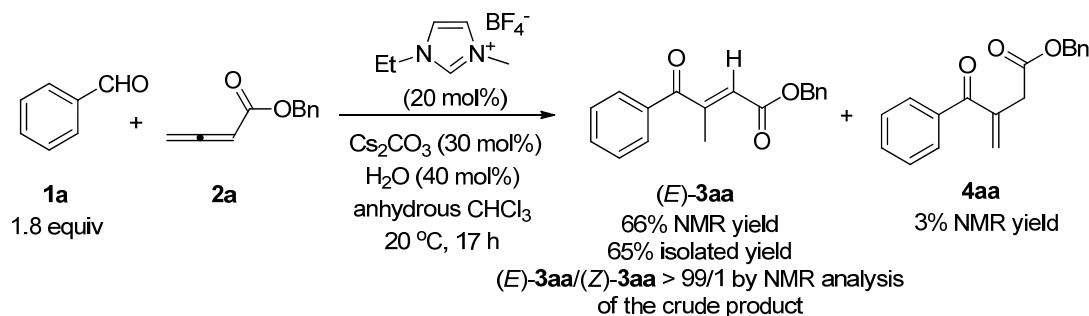

Following **Typical Procedure I**, the reaction of Cs<sub>2</sub>CO<sub>3</sub> (0.0976 g, 0.3 mmol), 1-ethyl-3-methylimidazolium tetrafluoroborate (0.0404 g, 0.2 mmol)/anhydrous CHCl<sub>3</sub> (5 mL), **1a** (0.1917 g, 1.8 mmol)/anhydrous CHCl<sub>3</sub> (2.5 mL), **2a** (0.1741 g, 1 mmol)/anhydrous CHCl<sub>3</sub> (2.5 mL), and H<sub>2</sub>O (7.2 μL, d = 1.000 g/mL, 0.0072 g, 0.4 mmol) at 20 °C for 17 h afforded (*E*)-3aa (0.1812 g, 65%) (petroleum ether/ethyl acetate = 40/1 (400 mL) to 30/1 (400 mL) to 20/1 (300 mL)) (the ratio of (*E*)-3aa/(*Z*)-3aa was > 99/1 and 3% of 4aa was formed by NMR analysis of the crude product) as a liquid: <sup>1</sup>H NMR (300 MHz, CDCl<sub>3</sub>) δ 7.81-7.74 (m, 2H, ArH), 7.61-7.54 (m, 1H, ArH), 7.49-7.41 (m, 2H, ArH), 7.40-7.28 (m, 5H, ArH), 6.20 (q, *J* = 1.4 Hz, 1H, =CH), 5.21 (s, 2H, CH<sub>2</sub>), 2.44 (d, *J* = 1.5 Hz, 3H, CH<sub>3</sub>); <sup>13</sup>C NMR (75 MHz, CDCl<sub>3</sub>) δ 197.8, 165.5, 152.5, 135.7, 135.4, 133.1, 129.7, 128.55, 128.49, 128.3, 125.0, 66.4, 15.5.

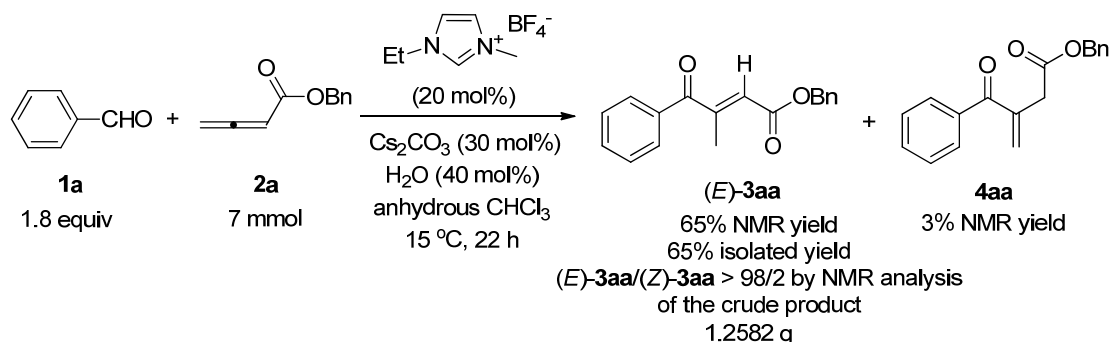

**Gram scale reaction:** Following **Typical Procedure I**, the reaction of  $\text{Cs}_2\text{CO}_3$  (0.6849 g, 2.1 mmol), 1-ethyl-3-methylimidazolium tetrafluoroborate (0.2826 g, 1.4 mmol)/anhydrous  $\text{CHCl}_3$  (35 mL), benzaldehyde **1a** (1.3373 g, 12.6 mmol)/anhydrous  $\text{CHCl}_3$  (17.5 mL), **2a** (1.2193 g, 7 mmol)/anhydrous  $\text{CHCl}_3$  (17.5 mL), and  $\text{H}_2\text{O}$  (50.5  $\mu\text{L}$ ,  $d = 1.000\text{ g/mL}$ , 0.0505 g, 2.8 mmol) at  $15^\circ\text{C}$  for 22 h afforded **(E)-3aa** (1.2582 g, 64%) (petroleum ether/ethyl acetate = 40/1 (400 mL  $\times$  3) to 30/1 (420 mL)) (the ratio of **(E)-3aa**/**(Z)-3aa** was  $>99/1$  and 3% of **4aa** was formed by NMR analysis of the crude product) as a liquid:  $^1\text{H}$  NMR (300 MHz,  $\text{CDCl}_3$ )  $\delta$  7.81-7.74 (m, 2H, ArH), 7.61-7.53 (m, 1H, ArH), 7.49-7.41 (m, 2H, ArH), 7.40-7.29 (m, 5H, ArH), 6.20 (q,  $J = 1.5\text{ Hz}$ , 1H, =CH), 5.21 (s, 2H,  $\text{CH}_2$ ), 2.44 (d,  $J = 1.5\text{ Hz}$ , 3H,  $\text{CH}_3$ );  $^{13}\text{C}$  NMR (75 MHz,  $\text{CDCl}_3$ )  $\delta$  197.8, 165.5, 152.5, 135.7, 135.5, 133.1, 129.7, 128.6, 128.5, 128.4, 125.0, 66.5, 15.6.

**(2) Benzyl 4-(4-bromophenyl)-3-methyl-4-oxobut-2(E)-enoate ((E)-3ba)**  
(mdk-11-006)

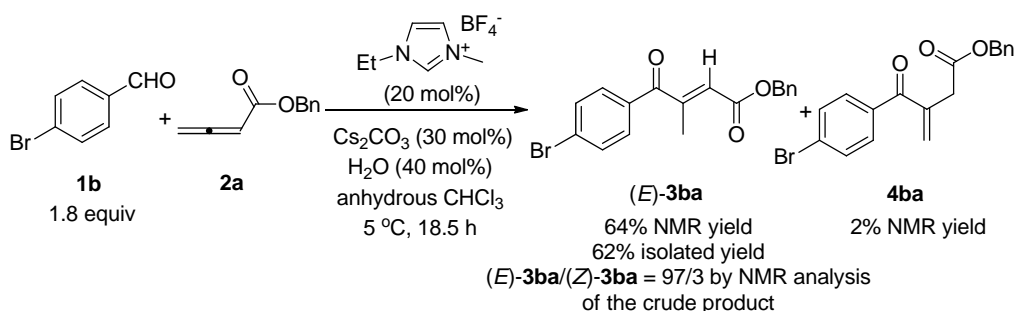

The reaction of Cs<sub>2</sub>CO<sub>3</sub> (0.0982 g, 0.3 mmol), 1-ethyl-3-methylimidazolium tetrafluoroborate (0.0403 g, 0.2 mmol)/anhydrous CHCl<sub>3</sub> (5 mL), 4-bromobenzaldehyde **1b** (0.3399 g, 1.8 mmol)/anhydrous CHCl<sub>3</sub> (2.5 mL), **2a** (0.1738 g, 1 mmol)/anhydrous CHCl<sub>3</sub> (2.5 mL), and H<sub>2</sub>O (7.2 μL, d = 1.000 g/mL, 0.0072 g, 0.4 mmol) at 5 °C for 18.5 h afforded (*E*)-**3ba** (0.2227 g, 62%) (petroleum ether/ethyl acetate = 50/1 (400 mL) to 20/1 (300 mL)) (the ratio of (*E*)-**3ba**/(*Z*)-**3ba** was 97/3 and 2% of **4ba** was formed by NMR analysis of the crude product) as a liquid: <sup>1</sup>H NMR (300 MHz, CDCl<sub>3</sub>) δ 7.69-7.55 (m, 4H, ArH), 7.42-7.28 (m, 5H, ArH), 6.17 (q, *J* = 1.6 Hz, 1H, =CH), 5.21 (s, 2H, CH<sub>2</sub>), 2.42 (d, *J* = 1.5 Hz, 3H, CH<sub>3</sub>); <sup>13</sup>C NMR (75 MHz, CDCl<sub>3</sub>) δ 196.6, 165.3, 151.9, 135.3, 134.4, 131.8, 131.1, 128.5, 128.4, 128.3, 125.3, 66.5, 15.4; IR (neat) ν (cm<sup>-1</sup>) 3065, 3033, 2954, 1723, 1667, 1584, 1567, 1497, 1481, 1455, 1396, 1384, 1351, 1304, 1263, 1190, 1137, 1110, 1069, 1028, 1010; MS (70 ev, EI) *m/z* (%) 360 (M<sup>+</sup>(<sup>81</sup>Br), 0.61), 358 (M<sup>+</sup>(<sup>79</sup>Br), 0.60), 91 (100); Elemental analysis calcd (%) for C<sub>18</sub>H<sub>15</sub>BrO<sub>3</sub>: C, 60.18, H, 4.21; Found: C, 60.13; H, 4.31.

**(3) Benzyl 4-(3-bromophenyl)-3-methyl-4-oxobut-2(*E*)-enoate ((*E*)-**3ca**) (mdk-11-035-1)**

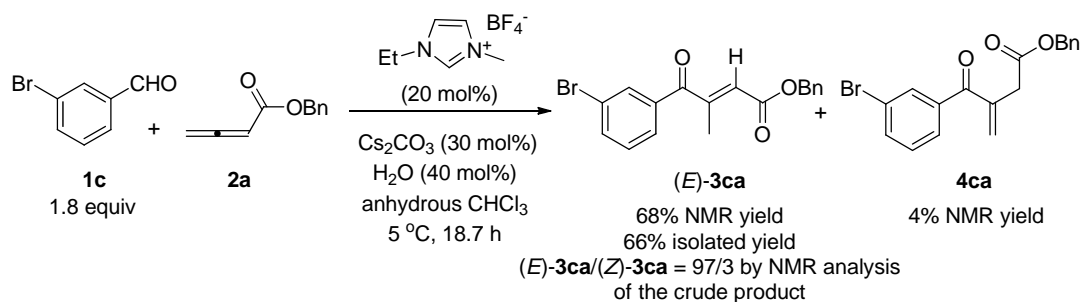

The reaction of Cs<sub>2</sub>CO<sub>3</sub> (0.0978 g, 0.3 mmol), 1-ethyl-3-methylimidazolium

tetrafluoroborate (0.0399 g, 0.2 mmol)/anhydrous  $\text{CHCl}_3$  (5 mL), 3-bromobenzaldehyde **1c** (0.3334 g, 1.8 mmol)/anhydrous  $\text{CHCl}_3$  (2.5 mL), **2a** (0.1735 g, 1 mmol)/anhydrous  $\text{CHCl}_3$  (2.5 mL), and  $\text{H}_2\text{O}$  (7.2  $\mu\text{L}$ ,  $d = 1.000 \text{ g/mL}$ , 0.0072 g, 0.4 mmol) at 5 °C for 18.7 h afforded (*E*)-**3ca** (0.2368 g, 66%) (petroleum ether/ethyl acetate = 40/1 (400 mL) to 20/1 (420 mL)) (the ratio of (*E*)-**3ca**/(*Z*)-**3ca** was 97/3 and 4% of **4ca** was formed by NMR analysis of the crude product) as a liquid:  $^1\text{H}$  NMR (300 MHz,  $\text{CDCl}_3$ )  $\delta$  7.90 (t,  $J = 1.8 \text{ Hz}$ , 1H, ArH), 7.73-7.63 (m, 2H, ArH), 7.43-7.28 (m, 6H, ArH), 6.20 (q,  $J = 1.5 \text{ Hz}$ , 1H, =CH), 5.21 (s, 2H,  $\text{CH}_2$ ), 2.42 (d,  $J = 1.5 \text{ Hz}$ , 3H,  $\text{CH}_3$ );  $^{13}\text{C}$  NMR (75 MHz,  $\text{CDCl}_3$ )  $\delta$  196.3, 165.3, 151.7, 137.7, 135.9, 135.3, 132.3, 130.0, 128.6, 128.4, 128.1, 125.8, 122.8, 66.6, 15.4; IR (neat)  $\nu$  ( $\text{cm}^{-1}$ ) 3089, 3065, 3033, 2954, 2889, 1723, 1667, 1639, 1587, 1565, 1498, 1455, 1418, 1382, 1352, 1256, 1190, 1139, 1069, 1029; MS (70 ev, EI)  $m/z$  (%) 360 ( $\text{M}^+(\text{}^{81}\text{Br})$ , 0.69), 358 ( $\text{M}^+(\text{}^{79}\text{Br})$ , 0.70), 91 (100); Elemental analysis calcd (%) for  $\text{C}_{18}\text{H}_{15}\text{BrO}_3$ : C, 60.18, H, 4.21; Found: C, 60.08; H, 4.37.

**(4) Benzyl 4-(2-bromophenyl)-3-methyl-4-oxobut-2(*E*)-enoate ((*E*)-**3da**) (mdk-11-036)**

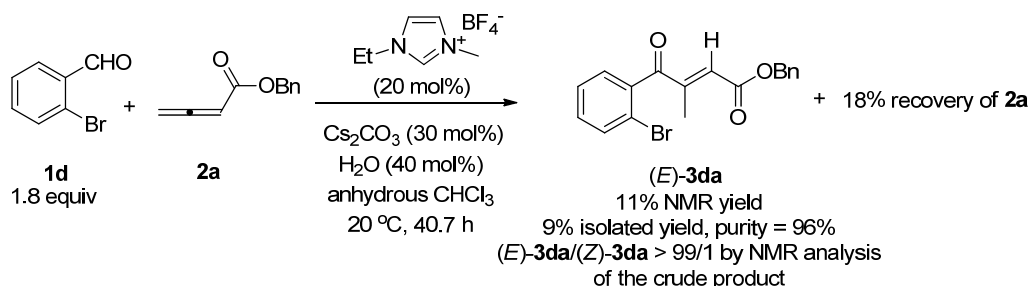

The reaction of  $\text{Cs}_2\text{CO}_3$  (0.0975 g, 0.3 mmol), 1-ethyl-3-methylimidazolium tetrafluoroborate (0.0406 g, 0.2 mmol)/anhydrous  $\text{CHCl}_3$  (5 mL),



2-bromobenzaldehyde **1d** (0.3334 g, 1.8 mmol)/anhydrous CHCl<sub>3</sub> (2.5 mL), **2a** (0.1746 g, 1 mmol)/anhydrous CHCl<sub>3</sub> (2.5 mL), and H<sub>2</sub>O (7.2 μL, d = 1.000 g/mL, 0.0072 g, 0.4 mmol) at 20 °C for 40.7 h afforded (*E*)-**3da** (0.0332 g, 9%, purity = 96%) (petroleum ether/ethyl acetate = 40/1 (400 mL × 2)) (the ratio of (*E*)-**3da**/(*Z*)-**3da** was > 99/1 and 18% recovery of **2a** was obtained by NMR analysis of the crude product) as a liquid: <sup>1</sup>H NMR (300 MHz, CDCl<sub>3</sub>) δ 7.62-7.55 (m, 1H, ArH), 7.45-7.24 (m, 8H, ArH), 6.20 (q, *J* = 1.5 Hz, 1H, =CH), 5.18 (s, 2H, CH<sub>2</sub>), 2.41 (d, *J* = 1.5 Hz, 3H, CH<sub>3</sub>); <sup>13</sup>C NMR (75 MHz, CDCl<sub>3</sub>) δ 198.1, 165.6, 150.9, 139.8, 135.2, 133.2, 131.5, 129.4, 129.0, 128.6, 128.54, 158.52, 127.3, 119.5, 66.8, 13.4; IR (neat) ν (cm<sup>-1</sup>) 3065, 3033, 2955, 1723, 1675, 1640, 1587, 1561, 1497, 1465, 1456, 1430, 1378, 1351, 1281, 1246, 1191, 1145, 1135, 1080, 1056, 1026; MS (ESI) *m/z* (%) 378 (M(<sup>81</sup>Br) + NH<sub>4</sub><sup>+</sup>), 376 (M(<sup>79</sup>Br) + NH<sub>4</sub><sup>+</sup>), 361 (M(<sup>81</sup>Br) + H<sup>+</sup>), 359 (M(<sup>79</sup>Br) + H<sup>+</sup>); HRMS calcd. for C<sub>18</sub>H<sub>16</sub>BrO<sub>3</sub> [M(<sup>79</sup>Br) + H<sup>+</sup>]: 359.0277, found: 359.0280.

**(5) Benzyl 4-([1,1'-biphenyl]-4-yl)-3-methyl-4-oxobut-2(*E*)-enoate ((*E*)-**3ea**) (mdk-11-057)**

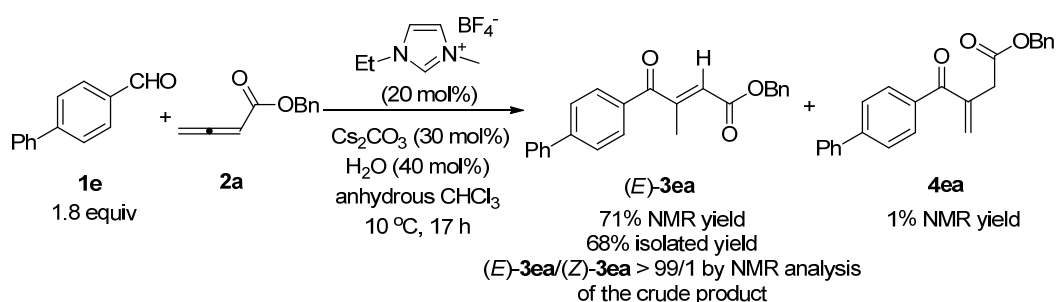

The reaction of Cs<sub>2</sub>CO<sub>3</sub> (0.0976 g, 0.3 mmol), 1-ethyl-3-methylimidazolium tetrafluoroborate (0.0402 g, 0.2 mmol)/anhydrous CHCl<sub>3</sub> (5 mL), 4-phenylbenzaldehyde **1e** (0.3345 g, 1.8 mmol)/anhydrous CHCl<sub>3</sub> (2.5 mL), **2a**

(0.1748 g, 1 mmol)/anhydrous  $\text{CHCl}_3$  (2.5 mL), and  $\text{H}_2\text{O}$  (7.2  $\mu\text{L}$ ,  $d = 1.000 \text{ g/mL}$ , 0.0072 g, 0.4 mmol) at 10 °C for 17 h afforded (*E*)-**3ea** (0.2427 g, 68%) (petroleum ether/ethyl acetate = 40/1 (440 mL  $\times$  2) to 20/1 (420 mL  $\times$  2)) (the ratio of (*E*)-**3ea**/(*Z*)-**3ea** was > 99/1 and 1% of **4ea** was formed by NMR analysis of the crude product) as a solid: m. p. 64~66 °C (*n*-hexane/ $\text{Et}_2\text{O}$ );  $^1\text{H}$  NMR (300 MHz,  $\text{CDCl}_3$ )  $\delta$  7.92-7.83 (m, 2H, ArH), 7.72-7.65 (m, 2H, ArH), 7.65-7.58 (m, 2H, ArH), 7.52-7.29 (m, 8H, ArH), 6.24 (q,  $J = 1.5 \text{ Hz}$ , 1H, =CH), 5.22 (s, 2H,  $\text{CH}_2$ ), 2.47 (d,  $J = 1.5 \text{ Hz}$ , 3H,  $\text{CH}_3$ );  $^{13}\text{C}$  NMR (75 MHz,  $\text{CDCl}_3$ )  $\delta$  197.3, 165.5, 152.7, 145.9, 139.6, 135.5, 134.3, 130.3, 128.9, 128.6, 128.4, 128.3, 127.22, 127.16, 124.6, 66.5, 15.7; IR (neat)  $\nu$  ( $\text{cm}^{-1}$ ) 3063, 3032, 2954, 2890, 1951, 1723, 1660, 1602, 1558, 1498, 1486, 1455, 1449, 1404, 1381, 1351, 1312, 1266, 1189, 1137, 1077, 1030, 1007; MS (70 ev, EI)  $m/z$  (%) 356 ( $\text{M}^+$ , 19.71), 91 (100); Elemental analysis calcd (%) for  $\text{C}_{24}\text{H}_{20}\text{O}_3$ : C, 80.88, H, 5.66; Found: C, 80.59; H, 5.64.

**(6) Benzyl 4-(4-cyanophenyl)-3-methyl-4-oxobut-2(*E*)-enoate ((*E*)-3fa)**  
**((zwl-cf-1-127))**

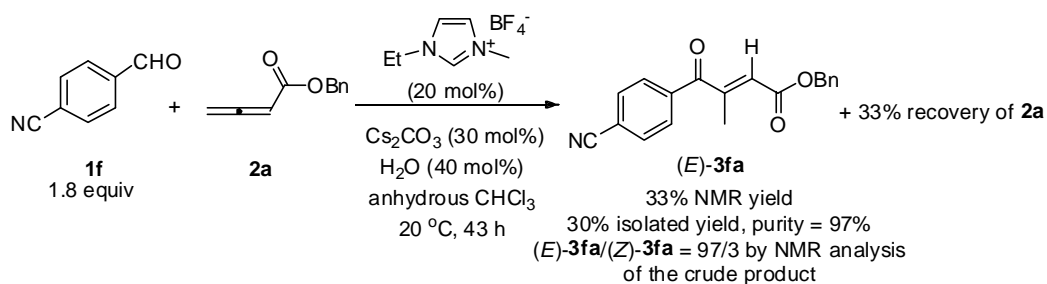

The reaction of  $\text{Cs}_2\text{CO}_3$  (0.0978 g, 0.3 mmol), 1-ethyl-3-methylimidazolium tetrafluoroborate (0.0401 g, 0.2 mmol)/anhydrous  $\text{CHCl}_3$  (5 mL), 4-cyanobenzaldehyde **1f** (0.2408 g, 1.8 mmol)/anhydrous  $\text{CHCl}_3$  (2.5 mL), **2a** (0.1741 g, 1 mmol)/anhydrous  $\text{CHCl}_3$  (2.5 mL), and  $\text{H}_2\text{O}$  (7.2  $\mu\text{L}$ ,  $d = 1.000 \text{ g/mL}$ , 0.0072 g,

0.4 mmol) at 20 °C for 43 h afforded (*E*)-**3fa** (0.0946 g, 30%, purity = 97%) (petroleum ether/ethyl acetate = 40/1 (1.6 L) to 20/1 (800 mL)) (the ratio of (*E*)-**3fa**/(*Z*)-**3fa** was 97/3 and 33% recovery of **2a** was obtained by NMR analysis of the crude product) as a liquid: <sup>1</sup>H NMR (300 MHz, CDCl<sub>3</sub>) δ 7.87-7.80 (m, 2H, ArH), 7.80-7.71 (m, 2H, ArH), 7.42-7.30 (m, 5H, ArH), 6.20 (d, *J* = 1.2 Hz, 1H, =CH), 5.22 (s, 2H, CH<sub>2</sub>), 2.43 (d, *J* = 0.8 Hz, 3H, CH<sub>3</sub>); <sup>13</sup>C NMR (75 MHz, CDCl<sub>3</sub>) δ 196.2, 165.1, 150.9, 139.5, 135.2, 132.3, 129.8, 128.6, 128.5, 128.4, 127.1, 117.7, 116.2, 66.7, 15.0; IR (neat) ν (cm<sup>-1</sup>) 3091, 3065, 3035, 2956, 2231, 1723, 1668, 1639, 1606, 1587, 1564, 1498, 1455, 1404, 1383, 1353, 1310, 1290, 1264, 1192, 1138, 1115, 1081, 1029, 1017, 1002; MS (70 ev, EI) *m/z* (%) 305 (M<sup>+</sup>, 0.48), 91 (100); Elemental analysis calcd (%) for C<sub>19</sub>H<sub>15</sub>NO<sub>3</sub>: C, 74.74, H, 4.95; Found: C, 74.61; H, 5.03.

**(7) Benzyl 4-(4-methoxycarbonylphenyl)-3-methyl-4-oxobut-2(*E*)-enoate ((*E*)-**3ga**) (mdk-10-184)**

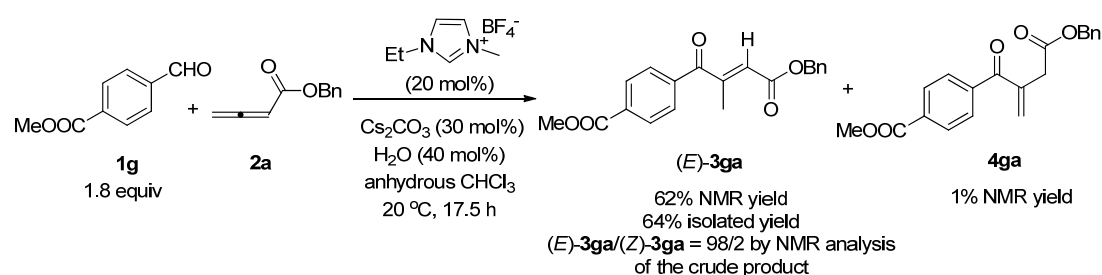

The reaction of Cs<sub>2</sub>CO<sub>3</sub> (0.0978 g, 0.3 mmol), 1-ethyl-3-methylimidazolium tetrafluoroborate (0.0406 g, 0.2 mmol)/anhydrous CHCl<sub>3</sub> (5 mL), methyl 4-formylbenzoate **1g** (0.3016 g, 1.8 mmol)/anhydrous CHCl<sub>3</sub> (2.5 mL), **2a** (0.1738 g, 1 mmol)/anhydrous CHCl<sub>3</sub> (2.5 mL), and H<sub>2</sub>O (7.2 μL, d = 1.000 g/mL, 0.0072 g, 0.4 mmol) at 20 °C for 17.5 h afforded (*E*)-**3ga** (0.2170 g, 64%) (petroleum ether/ethyl acetate = 30/1 (420 mL × 2 + 300 mL)) (the ratio of (*E*)-**3ga**/(*Z*)-**3ga** was 98/2 and 1%

of **4ga** was formed by NMR analysis of the crude product) as a solid; m.p. 68~70 °C (*n*-hexane/DCM): <sup>1</sup>H NMR (300 MHz, CDCl<sub>3</sub>) δ 8.16-8.08 (m, 2H, ArH), 7.84-7.75 (m, 2H, ArH), 7.40-7.28 (m, 5H, ArH), 6.22 (q, *J* = 1.5 Hz, 1H, =CH), 5.21 (s, 2H, CH<sub>2</sub>), 3.95 (s, 3H, OCH<sub>3</sub>), 2.44 (d, *J* = 1.5 Hz, 3H, CH<sub>3</sub>); <sup>13</sup>C NMR (75 MHz, CDCl<sub>3</sub>) δ 197.2, 166.0, 165.3, 151.6, 139.5, 135.3, 133.7, 129.6, 129.4, 128.6, 128.4, 126.4, 66.6, 52.4, 15.1; IR (neat) ν (cm<sup>-1</sup>) 3065, 3034, 3004, 1727, 1667, 1639, 1587, 1571, 1500, 1455, 1436, 1406, 1382, 1353, 1282, 1265, 1191, 1139, 1107, 1029, 1017; MS (70 ev, EI) *m/z* (%) 338 (*M*<sup>+</sup>, 1.60), 232 (100); Elemental analysis calcd (%) for C<sub>20</sub>H<sub>18</sub>O<sub>5</sub>: C, 70.99, H, 5.36; Found: C, 70.88; H, 5.44.

**(8) Benzyl 4-(4-acetylphenyl)-3-methyl-4-oxobut-2(*E*)-enoate ((*E*)-**3ha**)**  
**(mdk-11-043)**

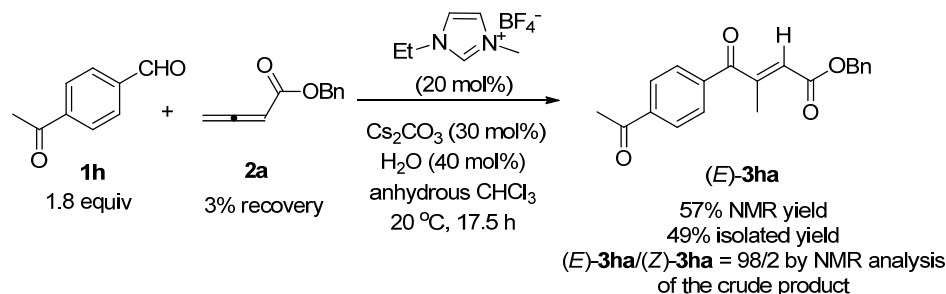

The reaction of Cs<sub>2</sub>CO<sub>3</sub> (0.0979 g, 0.3 mmol), 1-ethyl-3-methylimidazolium tetrafluoroborate (0.0407 g, 0.2 mmol)/anhydrous CHCl<sub>3</sub> (5 mL), 4-acetylbenzaldehyde **1h** (0.2664 g, 1.8 mmol)/anhydrous CHCl<sub>3</sub> (2.5 mL), **2a** (0.1747 g, 1 mmol)/anhydrous CHCl<sub>3</sub> (2.5 mL), and H<sub>2</sub>O (7.2 μL, *d* = 1.000 g/mL, 0.0072 g, 0.4 mmol) at 20 °C for 17.5 h afforded (*E*)-**3ha** (DCM (300 mL), afforded pure (*E*)-**3ha** (0.0238 g) and impure (*E*)-**3ha** (0.1108 g), the impure part was recrystallized in *n*-hexane/DCM, afforded pure (*E*)-**3ha** (0.1024 g), the mother liquid

was evaporated and recrystallized in *n*-hexane/DCM again, afforded pure (*E*)-**3ha** (0.0319 g), combined weight: 0.0238 g + 0.1024 g + 0.0319 g = 0.1581 g, 49%) (the ratio of (*E*)-**3ha**/(*Z*)-**3ha** was 98/2 by NMR analysis of the crude product) as a solid; m.p. 83~85 °C (*n*-hexane/DCM): <sup>1</sup>H NMR (300 MHz, CDCl<sub>3</sub>) δ 8.07-7.98 (m, 2H, ArH), 7.86-7.79 (m, 2H, ArH), 7.42-7.29 (m, 5H, ArH), 6.22 (q, *J* = 1.4 Hz, 1H, =CH), 5.21 (s, 2H, CH<sub>2</sub>), 2.65 (s, 3H, CH<sub>3</sub>), 2.44 (d, *J* = 1.5 Hz, 3H, CH<sub>3</sub>); <sup>13</sup>C NMR (75 MHz, CDCl<sub>3</sub>) δ 197.2, 197.1, 165.3, 151.6, 139.9, 139.5, 135.3, 129.7, 128.6, 128.4, 128.3, 126.5, 66.6, 26.8, 15.1; IR (KBr) ν (cm<sup>-1</sup>) 3092, 3066, 3037, 3011, 2935, 2879, 1720, 1683, 1656, 1637, 1499, 1452, 1403, 1389, 1353, 1306, 1272, 1261, 1249, 1200, 1158, 1142, 1118, 1074, 1040, 1030, 1000; MS (70 ev, EI) *m/z* (%) 322 (M<sup>+</sup>, 1.27), 91 (100); Elemental analysis calcd (%) for C<sub>20</sub>H<sub>18</sub>O<sub>4</sub>: C, 74.52, H, 5.63; Found: C, 74.12; H, 5.89.

**(9) Benzyl 4-(4-methoxyphenyl)-3-methyl-4-oxobut-2(*E*)-enoate ((*E*)-**3ia**)**

**(mdk-11-096)**

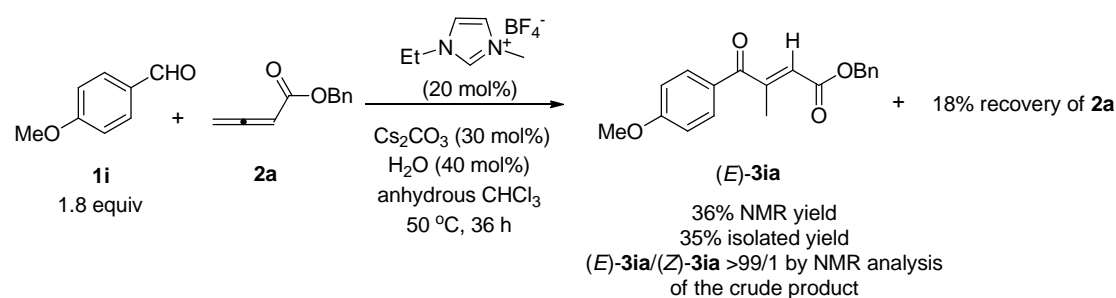

The reaction of Cs<sub>2</sub>CO<sub>3</sub> (0.0976 g, 0.3 mmol), 1-ethyl-3-methylimidazolium tetrafluoroborate (0.0403 g, 0.2 mmol)/anhydrous CHCl<sub>3</sub> (5 mL), 4-methoxybenzaldehyde **1i** (0.2455 g, 1.8 mmol)/anhydrous CHCl<sub>3</sub> (2.5 mL), **2a** (0.1742 g, 1 mmol)/anhydrous CHCl<sub>3</sub> (2.5 mL), and H<sub>2</sub>O (7.2 μL, d = 1.000 g/mL, 0.0072 g, 0.4 mmol) at 50 °C for 36 h afforded (*E*)-**3ia** (0.1081 g, 35%) (petroleum

ether/ethyl acetate = 30/1 (420 mL + 300 mL)) (the ratio of (*E*)-**3ia**/(*Z*)-**3ia** was >99/1 and 18% recovery of **2a** was obtained by NMR analysis of the crude product) as a liquid: <sup>1</sup>H NMR (300 MHz, CDCl<sub>3</sub>) δ 7.86-7.77 (m, 2H, ArH), 7.42-7.28 (m, 5H, ArH), 6.97-6.90 (m, 2H, ArH), 6.13 (q, *J* = 1.6 Hz, 1H, =CH), 5.21 (s, 2H, CH<sub>2</sub>), 3.87 (s, 3H, OCH<sub>3</sub>), 2.43 (d, *J* = 1.5 Hz, 3H, CH<sub>3</sub>); <sup>13</sup>C NMR (75 MHz, CDCl<sub>3</sub>) δ 196.4, 165.6, 163.8, 153.4, 135.6, 132.2, 128.6, 128.3, 128.1, 123.0, 113.8, 66.3, 55.5, 16.0; IR (neat) ν (cm<sup>-1</sup>) 3065, 3034, 3008, 2956, 2840, 1722, 1657, 1652, 1599, 1574, 1508, 1456, 1442, 1421, 1381, 1351, 1313, 1258, 1192, 1136, 1027; MS (70 ev, EI) *m/z* (%) 310 (*M*<sup>+</sup>, 9.53), 135 (100); HRMS calcd for C<sub>19</sub>H<sub>18</sub>O<sub>4</sub> (*M*<sup>+</sup>): 310.1205, found: 310.1202.

**(10) Benzyl 3-methyl-4-(naphthalen-2-yl)-4-oxobut-2(*E*)-enoate ((*E*)-**3ja**) (mdk-11-049)**

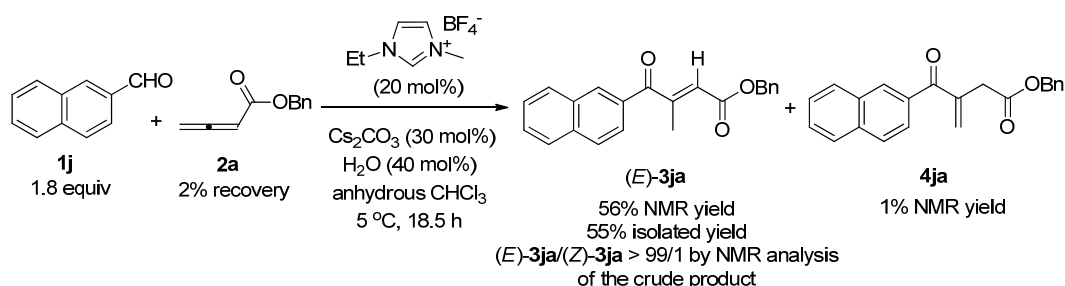

The reaction of Cs<sub>2</sub>CO<sub>3</sub> (0.0975 g, 0.3 mmol), 1-ethyl-3-methylimidazolium tetrafluoroborate (0.0400 g, 0.2 mmol)/anhydrous CHCl<sub>3</sub> (5 mL), 2-naphthaldehyde **1j** (0.2866 g, 1.8 mmol)/anhydrous CHCl<sub>3</sub> (2.5 mL), **2a** (0.1746 g, 1 mmol)/anhydrous CHCl<sub>3</sub> (2.5 mL), and H<sub>2</sub>O (7.2 μL, d = 1.000 g/mL, 0.0072 g, 0.4 mmol) at 5 °C for 18.5 h afforded (*E*)-**3ja** (0.1810 g, 55%) (petroleum ether/ethyl acetate = 50/1 (400 mL × 3)) (the ratio of (*E*)-**3ja**/(*Z*)-**3ja** was >99/1 and 1% of **4ja** was formed by NMR analysis of the crude product) as a liquid: <sup>1</sup>H NMR (300 MHz,

CDCl<sub>3</sub>)  $\delta$  8.27 (d,  $J$  = 0.6 Hz, 1H, ArH), 7.96-7.82 (m, 4H, ArH), 7.64-7.50 (m, 2H, ArH), 7.41-7.27 (m, 5H, ArH), 6.26 (q,  $J$  = 1.5 Hz, 1H, =CH), 5.22 (s, 2H, CH<sub>2</sub>), 2.51 (d,  $J$  = 1.5 Hz, 3H, CH<sub>3</sub>); <sup>13</sup>C NMR (75 MHz, CDCl<sub>3</sub>)  $\delta$  197.7, 165.6, 152.9, 135.5, 135.4, 132.9, 132.1, 131.8, 129.5, 128.7, 128.6, 128.5, 128.3, 127.8, 126.9, 124.9, 124.6, 66.5, 15.8; IR (neat)  $\nu$  (cm<sup>-1</sup>) 3060, 3034, 2954, 1722, 1659, 1626, 1596, 1498, 1465, 1456, 1436, 1383, 1352, 1283, 1233, 1202, 1183, 1140, 1117, 1028; MS (70 ev, EI)  $m/z$  (%) 330 (M<sup>+</sup>, 6.49), 91 (100); HRMS calcd for C<sub>22</sub>H<sub>18</sub>O<sub>3</sub> (M<sup>+</sup>): 330.1256, found: 330.1256.

**(11) Benzyl 4-(furan-2-yl)-3-methyl-4-oxobut-2(*E*)-enoate ((*E*)-3ka)**  
**(mdk-11-071-1)**

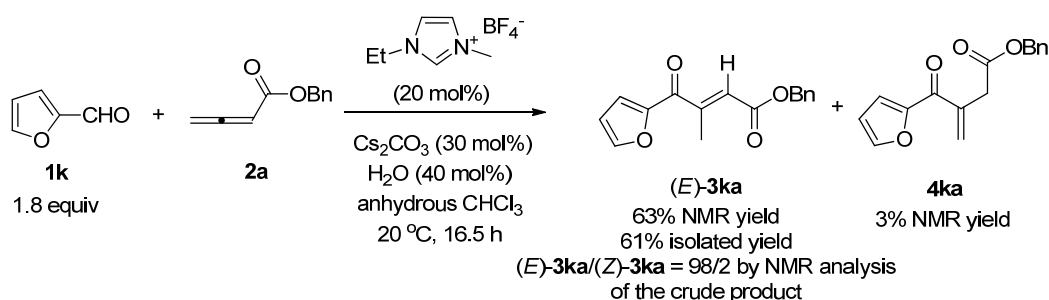

The reaction of Cs<sub>2</sub>CO<sub>3</sub> (0.0978 g, 0.3 mmol), 1-ethyl-3-methylimidazolium tetrafluoroborate (0.0400 g, 0.2 mmol)/anhydrous CHCl<sub>3</sub> (5 mL), furan-2-carbaldehyde **1k** (0.1728 g, 1.8 mmol)/anhydrous CHCl<sub>3</sub> (2.5 mL), **2a** (0.1736 g, 1 mmol)/anhydrous CHCl<sub>3</sub> (2.5 mL), and H<sub>2</sub>O (7.2  $\mu$ L,  $d$  = 1.000 g/mL, 0.0072 g, 0.4 mmol) at 20 °C for 16.5 h afforded (*E*)-**3ka** (0.1631 g, 61%) ((petroleum ether/ethyl acetate = 30/1 (450 mL  $\times$  2) to 20/1 (420 mL) to 10/1 (400 mL + 330 mL)) (the ratio of (*E*)-**3ka**/(*Z*)-**3ka** was 98/2 and 3% of **4ka** was formed by NMR analysis of the crude product) as a liquid: <sup>1</sup>H NMR (300 MHz, CDCl<sub>3</sub>)  $\delta$  7.70-7.65 (m, 1H,

ArH), 7.44-7.29 (m, 5H, ArH), 7.21 (dd,  $J_1 = 3.6$  Hz,  $J_2 = 0.6$  Hz, 1H, ArH), 6.56 (dd,  $J_1 = 3.6$  Hz,  $J_2 = 1.8$  Hz, 1H, ArH), 6.49 (q,  $J = 1.5$  Hz, 1H, =CH), 5.23 (s, 2H, CH<sub>2</sub>), 2.42 (d,  $J = 1.5$  Hz, 3H, CH<sub>3</sub>); <sup>13</sup>C NMR (75 MHz, CDCl<sub>3</sub>) δ 183.8, 165.4, 151.5, 150.8, 147.9, 135.4, 128.5, 128.3, 124.3, 121.0, 112.3, 66.5, 15.2; IR (neat) ν (cm<sup>-1</sup>) 3134, 3091, 3065, 3034, 2955, 1722, 1651, 1561, 1498, 1463, 1385, 1352, 1294, 1285, 1201, 1143, 1083, 1039, 1027; MS (70 ev, EI) m/z (%) 270 (M<sup>+</sup>, 1.03), 91 (100); HRMS calcd. for C<sub>16</sub>H<sub>14</sub>O<sub>4</sub> (M<sup>+</sup>): 270.0892, found: 270.0894.

**(12) Benzyl 3-methyl-4-oxo-4-(thiophen-2-yl)but-2(E)-enoate ((E)-3la)**

**(mdk-11-076)**

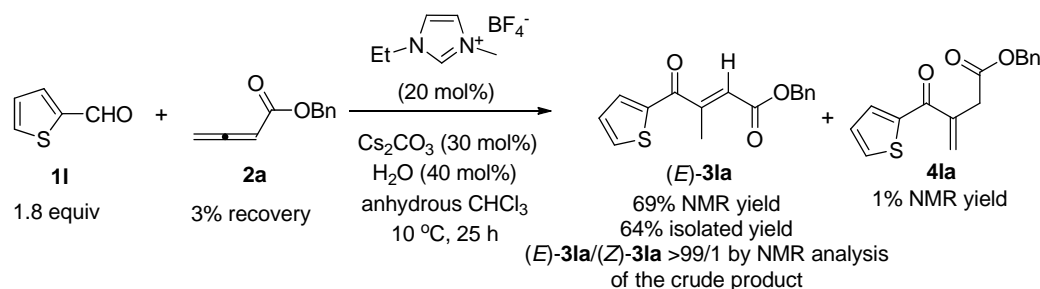

The reaction of Cs<sub>2</sub>CO<sub>3</sub> (0.0975 g, 0.3 mmol), 1-ethyl-3-methylimidazolium tetrafluoroborate (0.0403 g, 0.2 mmol)/anhydrous CHCl<sub>3</sub> (5 mL), thiophene-2-carbaldehyde **1I** (0.2025 g, 1.8 mmol)/anhydrous CHCl<sub>3</sub> (2.5 mL), **2a** (0.1740 g, 1 mmol)/anhydrous CHCl<sub>3</sub> (2.5 mL), and H<sub>2</sub>O (7.2 μL, d = 1.000 g/mL, 0.0072 g, 0.4 mmol) at 10 °C for 25 h afforded **(E)-3la** (0.1828 g, 64%) ((petroleum ether/ethyl acetate = 40/1 (400 mL × 2)) (the ratio of **(E)-3la**/**(Z)-3la** was >99/1 and 1% of **4la** was formed by NMR analysis of the crude product) as a liquid: <sup>1</sup>H NMR (300 MHz, CDCl<sub>3</sub>) δ 7.71 (dd,  $J_1 = 5.0$  Hz,  $J_2 = 1.1$  Hz, 1H, ArH), 7.64 (dd,  $J_1 = 3.8$  Hz,  $J_2 = 1.1$  Hz, 1H, ArH), 7.43-7.29 (m, 5H, ArH), 7.13 (dd,  $J_1 = 5.0$  Hz,  $J_2 = 4.1$  Hz,



1H, ArH), 6.36 (q,  $J = 1.5$  Hz, 1H, =CH), 5.22 (s, 2H, CH<sub>2</sub>), 2.44 (d,  $J = 1.5$  Hz, 3H, CH<sub>3</sub>); <sup>13</sup>C NMR (75 MHz, CDCl<sub>3</sub>)  $\delta$  189.3, 165.4, 152.5, 141.9, 135.4, 135.3, 134.8, 128.5, 128.31, 128.28, 128.1, 123.4, 66.4, 15.7; IR (neat)  $\nu$  (cm<sup>-1</sup>) 3091, 3033, 2953, 1722, 1636, 1513, 1498, 1455, 1412, 1383, 1356, 1278, 1189, 1134, 1081, 1055, 1025; MS (70 ev, EI)  $m/z$  (%) 286 (M<sup>+</sup>, 1.82), 91 (100); HRMS calcd. for C<sub>16</sub>H<sub>14</sub>O<sub>3</sub>S (M<sup>+</sup>): 286.0664, found: 286.0666.

**(13) 2-Hydroxy-1,2-diphenylethanone (6a) (mdk-11-102)**

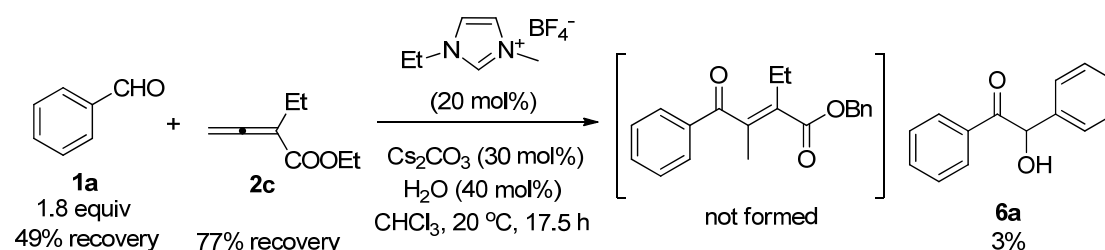

The reaction of Cs<sub>2</sub>CO<sub>3</sub> (0.0975 g, 0.3 mmol), 1-ethyl-3-methylimidazolium tetrafluoroborate (0.0401 g, 0.2 mmol)/anhydrous CHCl<sub>3</sub> (5 mL), benzaldehyde **1a** (0.1906 g, 1.8 mmol)/anhydrous CHCl<sub>3</sub> (2.5 mL), **2c** (0.1405 g, 1 mmol)/anhydrous CHCl<sub>3</sub> (2.5 mL), and H<sub>2</sub>O (7.2  $\mu$ L,  $d = 1.000$  g/mL, 0.0072 g, 0.4 mmol) at 20 °C for 17.5 h afforded **6a**<sup>1</sup> (0.0063 g, 3%) ((petroleum ether/ethyl acetate = 6/1 (420 mL)) (49% recovery of **1a** and 77% recovery of **2c** were obtained by NMR analysis of the crude product) as a solid; m.p. 129~131 °C (*n*-hexane/DCM) (lit.<sup>1a</sup> 132~133 °C): <sup>1</sup>H NMR (300 MHz, CDCl<sub>3</sub>)  $\delta$  7.96-7.86 (m, 2H, ArH), 7.58-7.47 (m, 1H, ArH), 7.44-7.22 (m, 7H, ArH), 5.96 (d,  $J = 6.0$  Hz, 1H, CH), 4.57 (d,  $J = 6.3$  Hz, 1H, OH); <sup>13</sup>C NMR (75 MHz, CDCl<sub>3</sub>)  $\delta$  198.9, 139.0, 133.9, 133.4, 129.1, 128.7, 128.6, 127.8, 76.2; IR (neat)  $\nu$  (cm<sup>-1</sup>) 3416, 3381, 3084, 3060, 3029, 2933, 1679, 1596, 1577, 1561, 1491, 1450, 1389, 1343, 1318, 1307, 1263, 1207, 1180, 1093, 1069, 1028, 1004; MS

(EI)  $m/z$  (%) 212 ( $M^+$ , 1.01), 105 (100).

**References:**

- (1) L. Rout, A. M. Harned, *Chem. Eur. J.*, 2009, **15**, 12926.
- (2) H. Yuan, W. Yoo, H. Miyamura, S. Kobayashi, *J. Am. Chem. Soc.*, 2012, **134**, 13970.

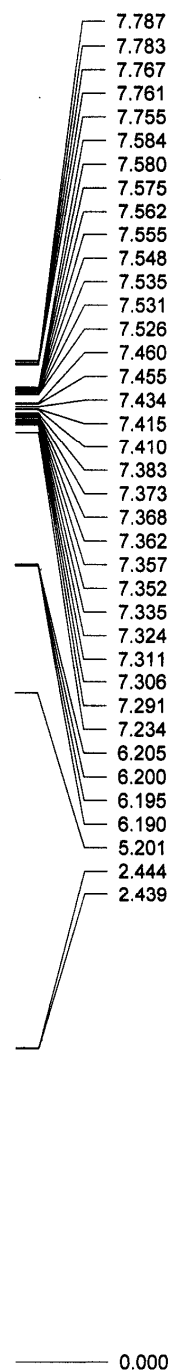

Specd, CDCl<sub>3</sub>,  
Fri Feb 24 12:02:47 2017  
USER: mmr  
SOLVENT:  
Experiment = zg30  
Pulse length = 14.000 usec  
Recycle delay = 1.000 sec  
NA = 8  
PTSD = 32768  
F1 = 300.131866 MHz  
F2 = 1.000000 MHz  
SWH = 6188.12 Hz

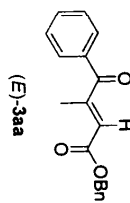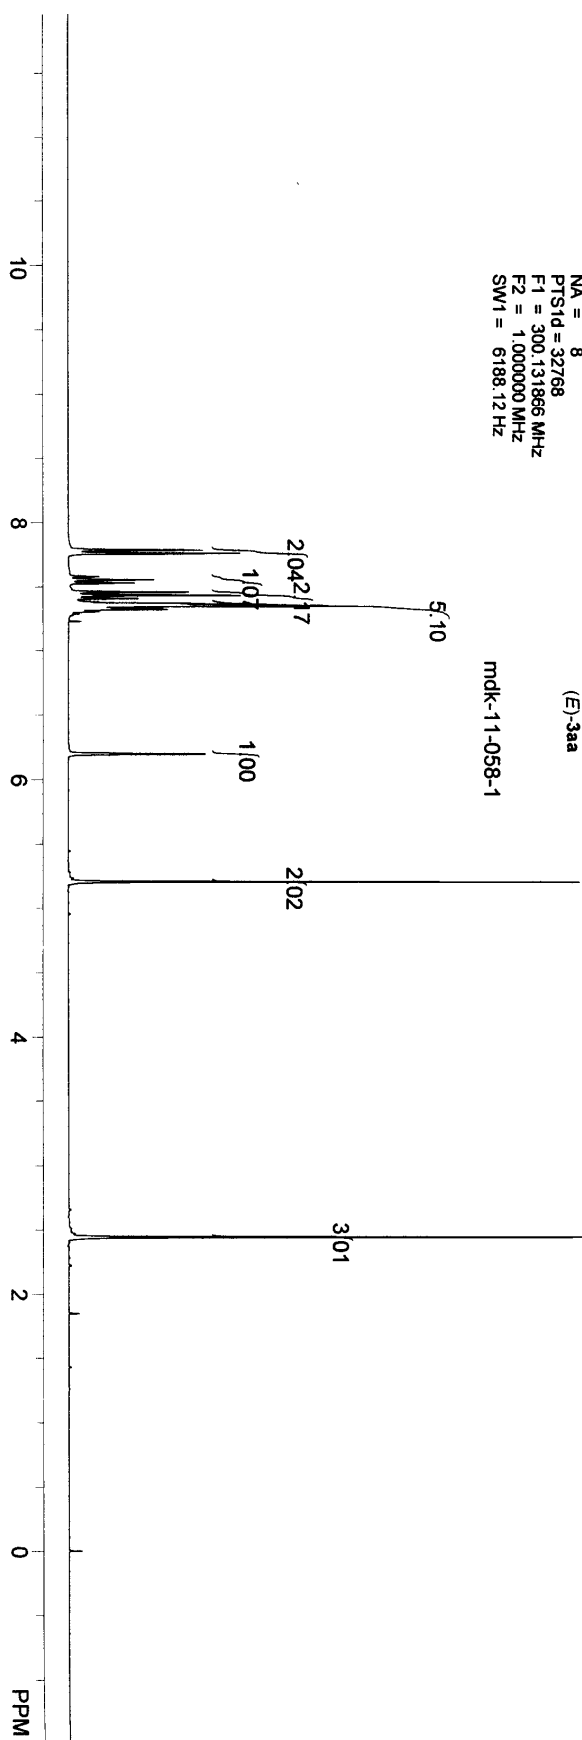

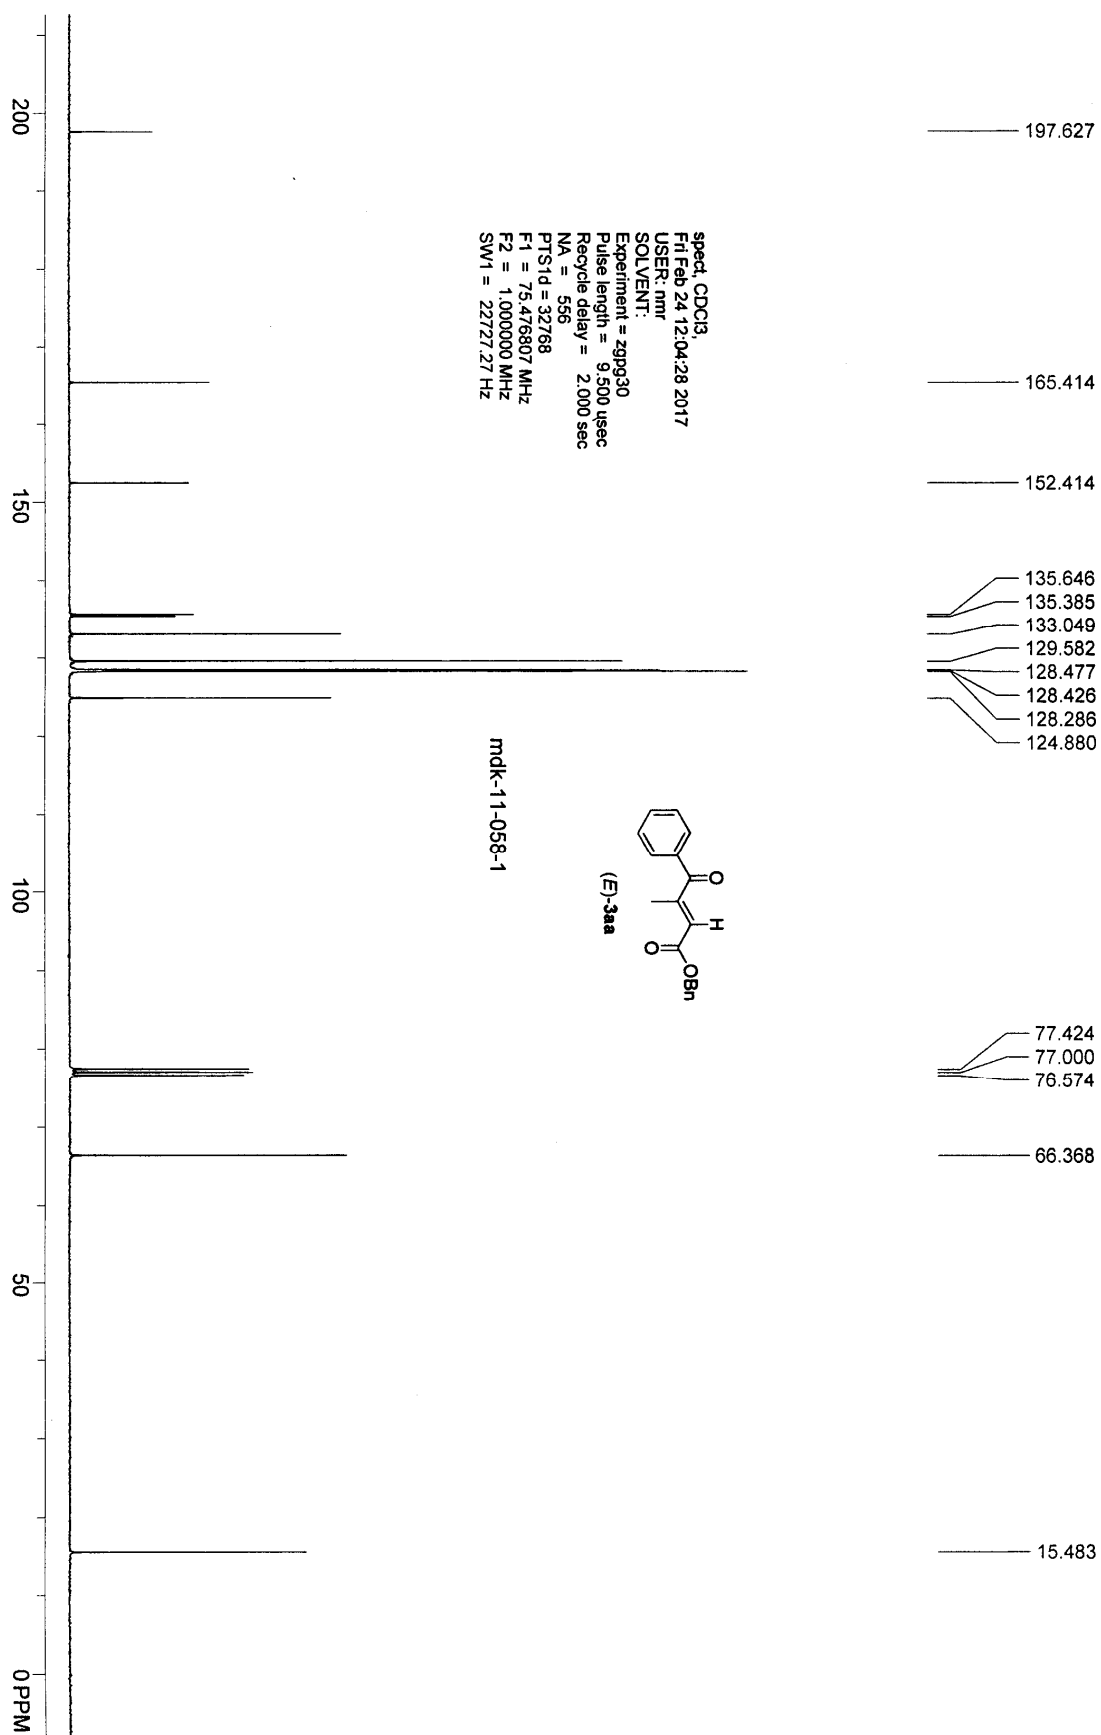

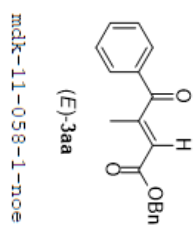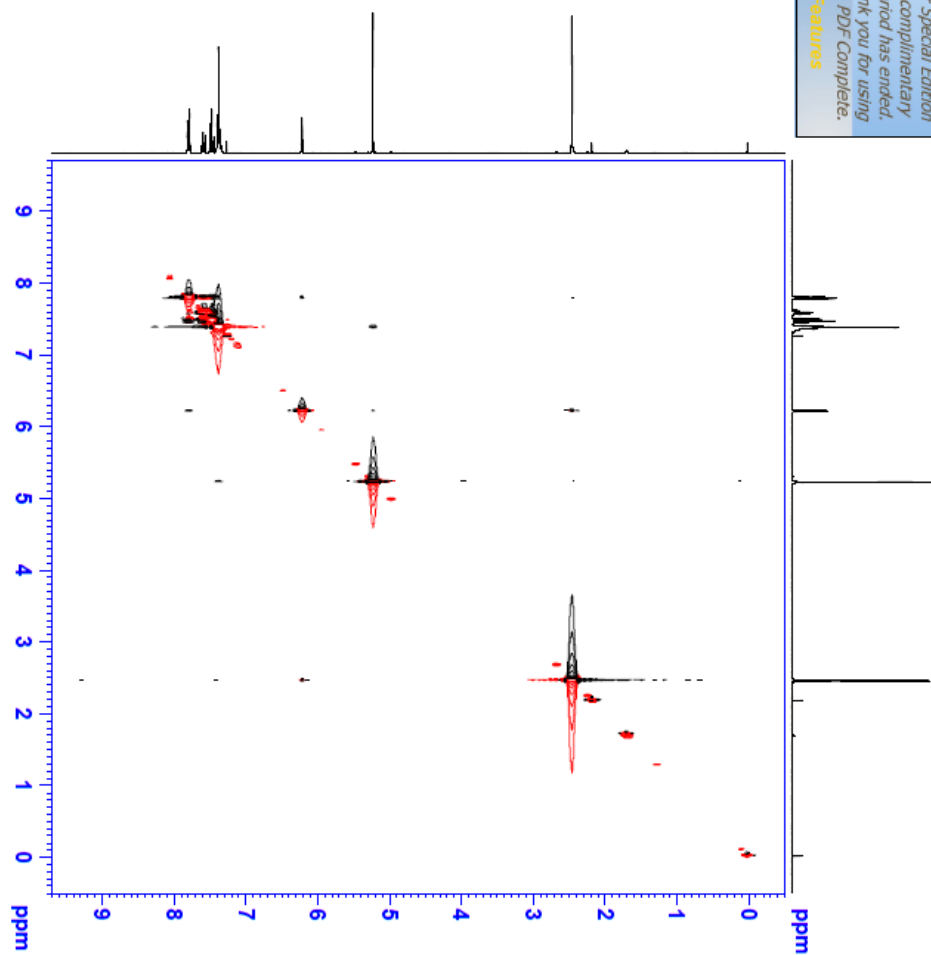

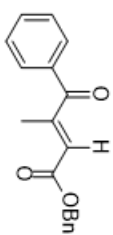

(E)-3aa

mdk-11-058-1-nce

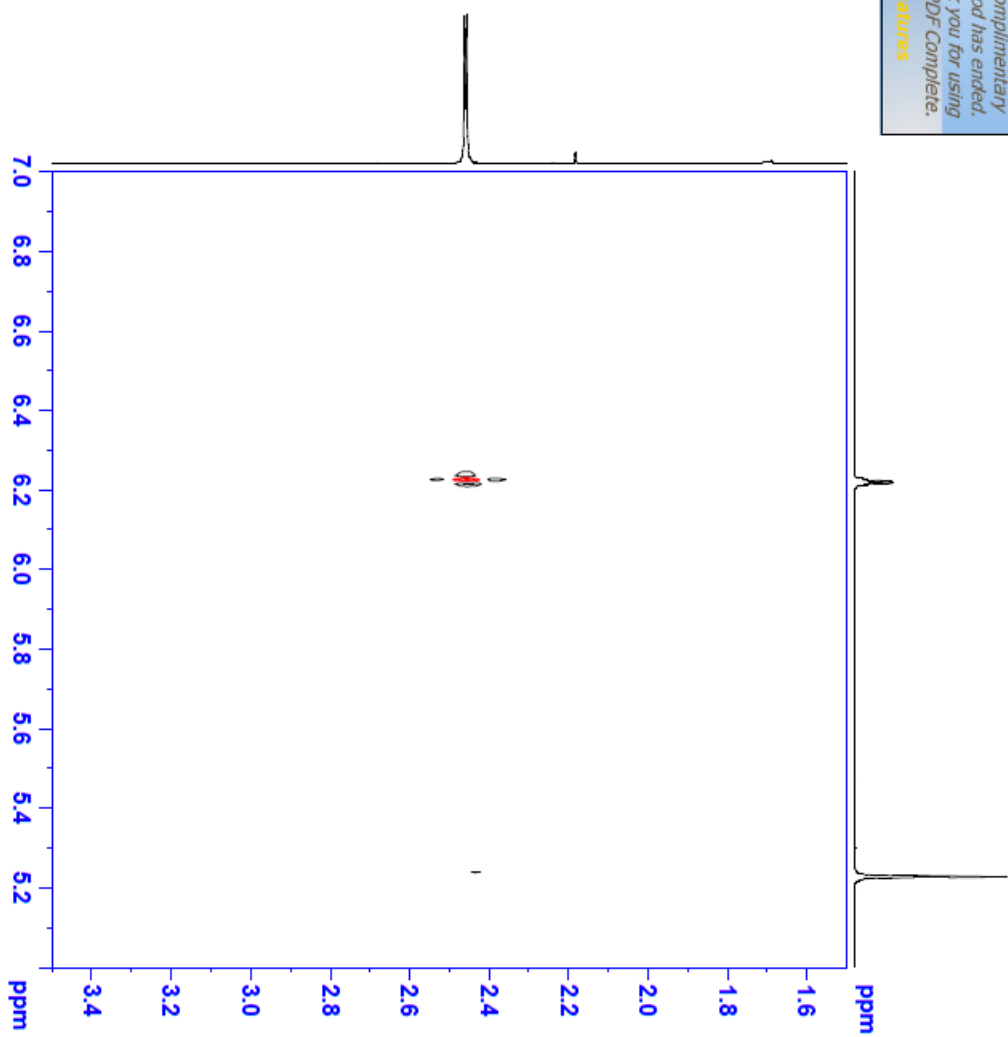

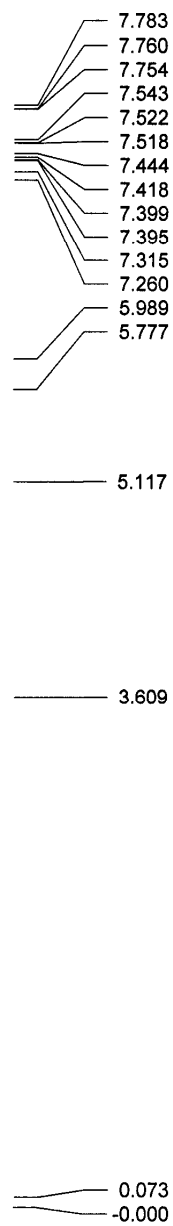

spect, CDCl<sub>3</sub>,  
Thu Feb 23 13:02:52 2017  
USER: nmf  
SOLVENT:  
Experiment = zg30  
Pulse length = 14.000 usec  
Recycle delay = 1.000 sec  
NA = 8  
PTSD = 32768  
F1 = 300.131866 MHz  
F2 = 1.000000 MHz  
SWH = 6188.12 Hz

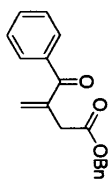

mdk-11-058-2

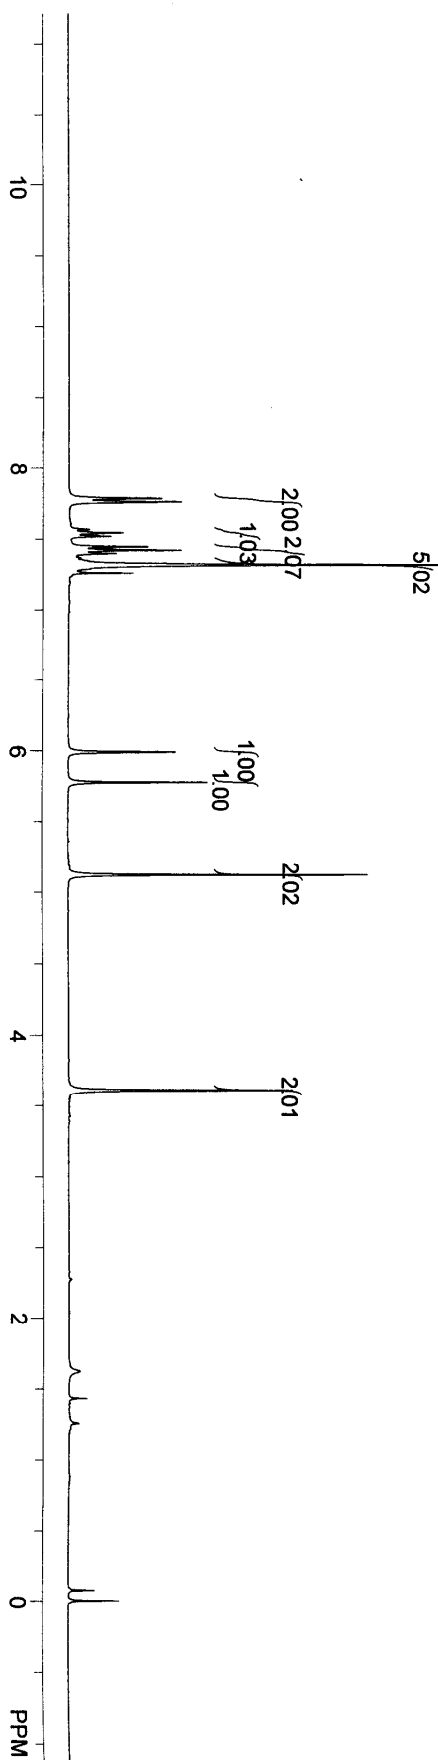



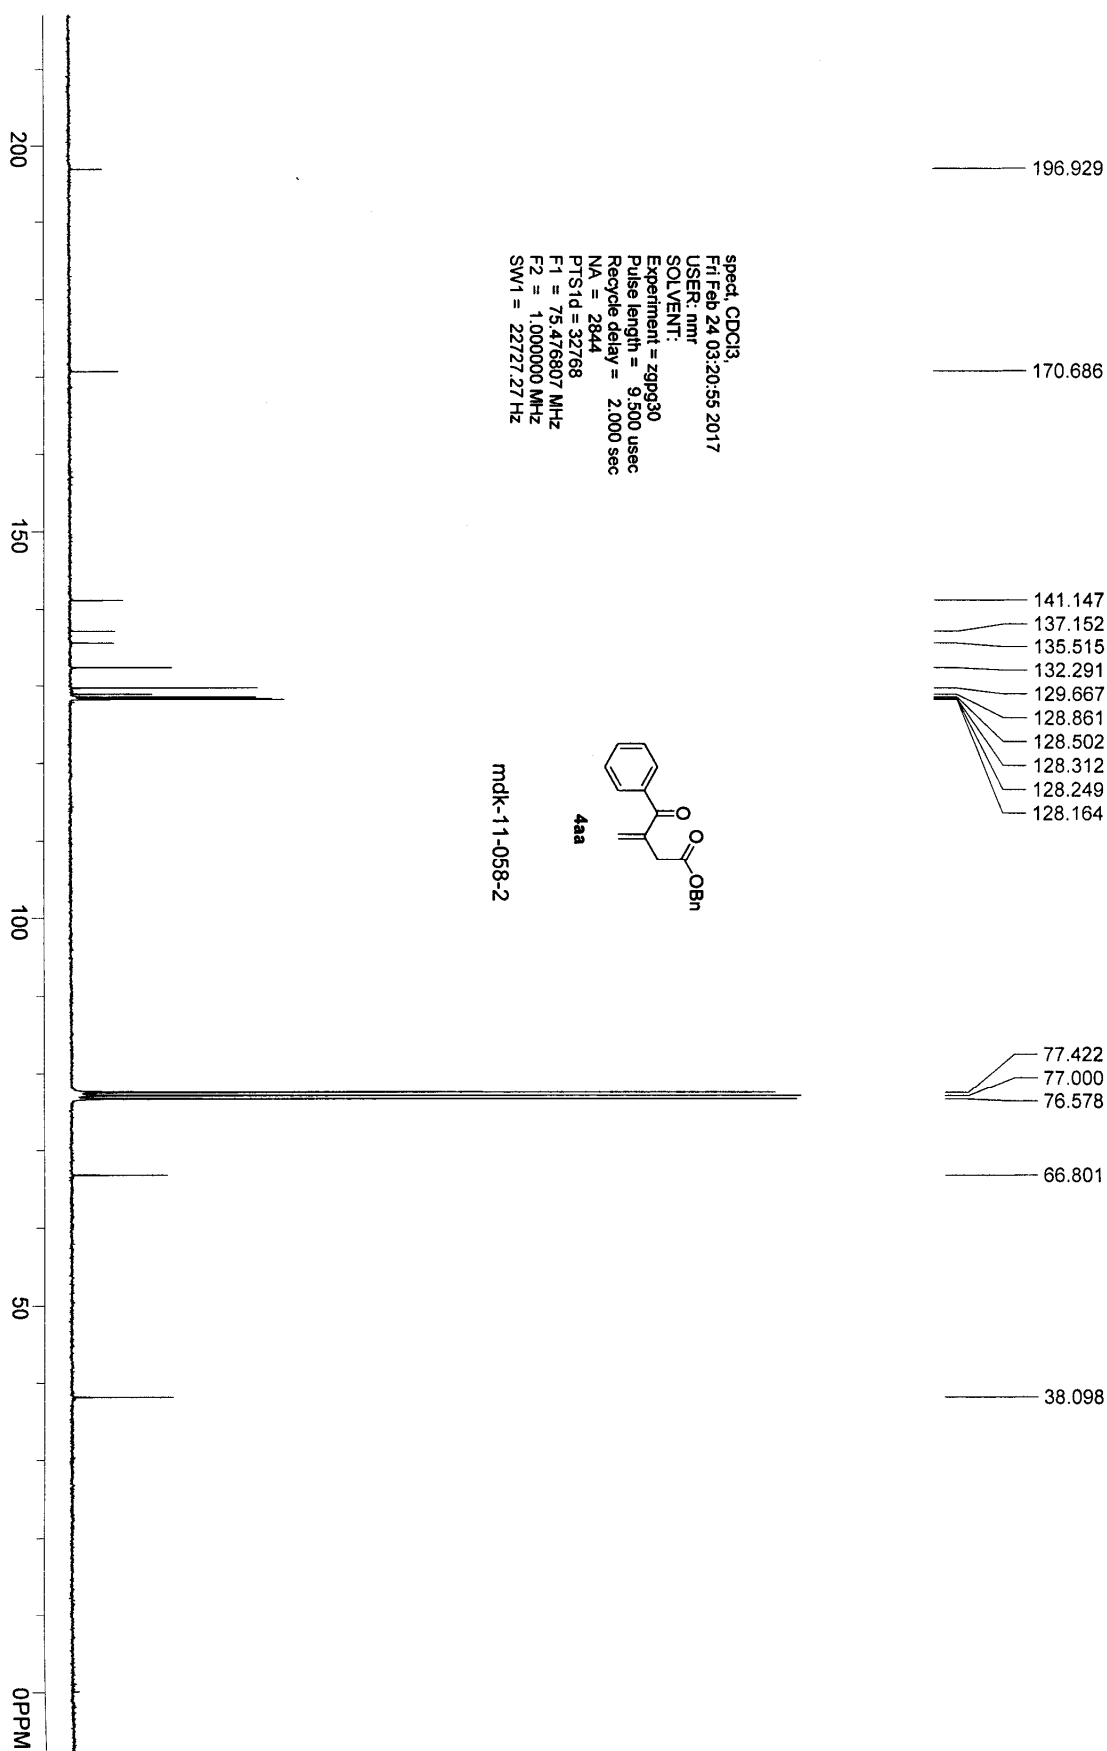

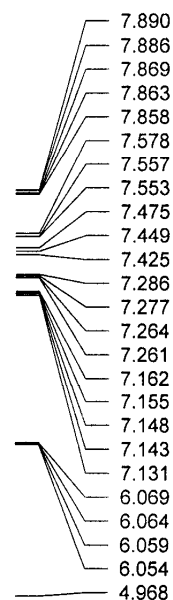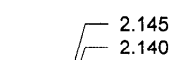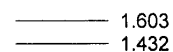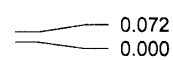

spec: CDCl<sub>3</sub>  
Thu Feb 23 13:56:52 2017  
USER: nmr  
SOLVENT:  
Experiment = zg30  
Pulse length = 14.000 usec  
Recycle delay = 1.000 sec  
NA = 8  
PTSD = 32768  
F1 = 300.131866 MHz  
F2 = 1.000000 MHz  
SW1 = 6188.12 Hz

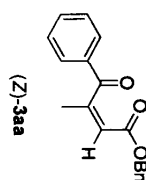

mdk-11-058-3

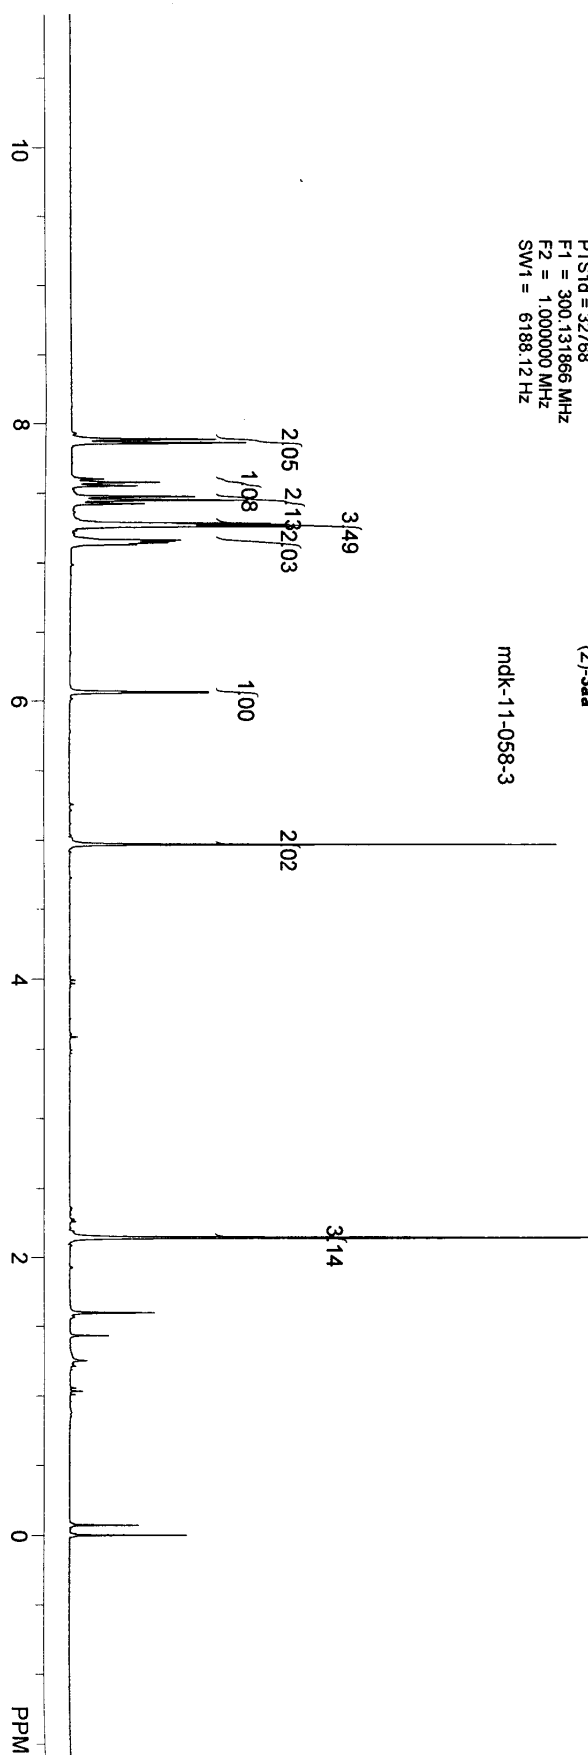

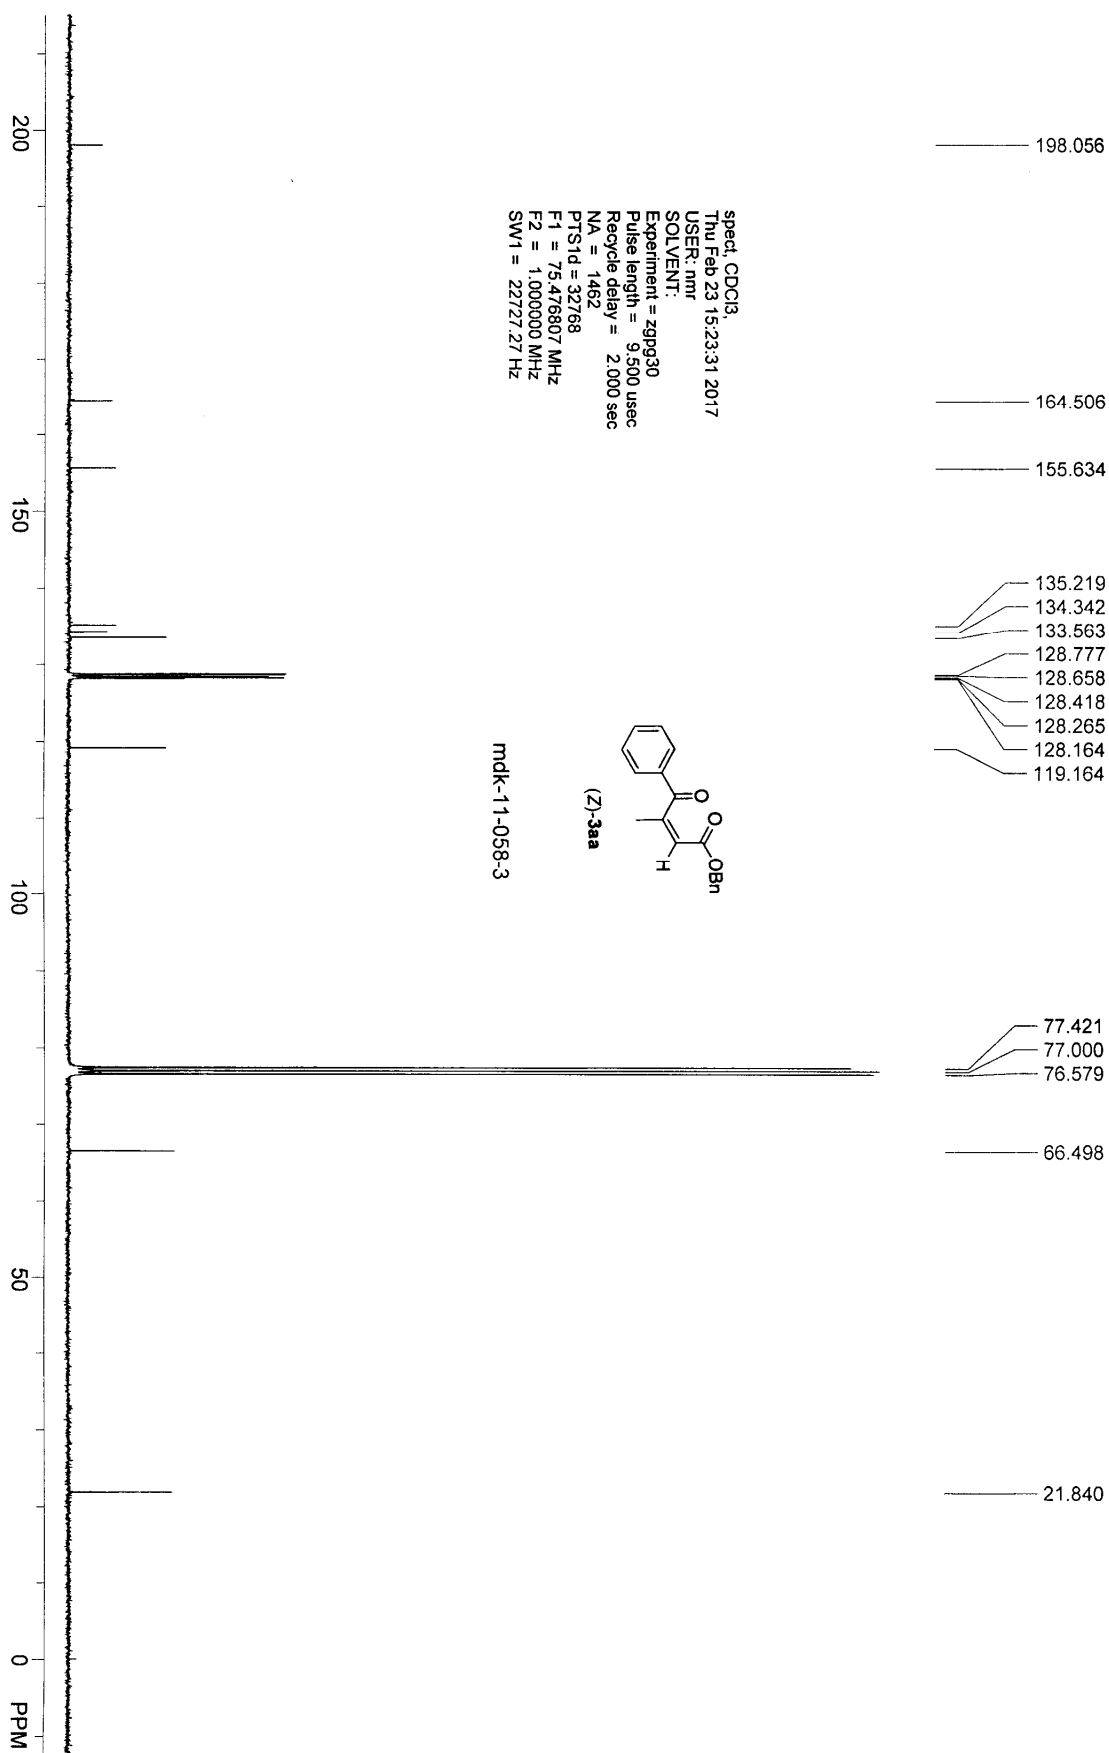

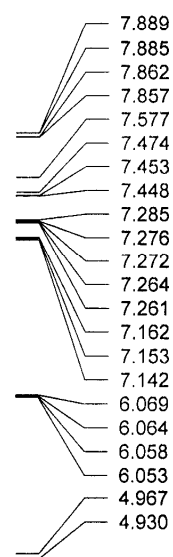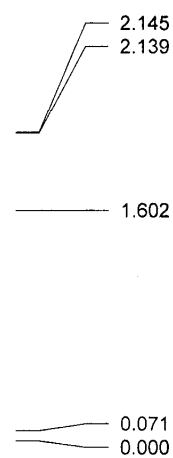

spect, CDCl<sub>3</sub>,  
Fri Feb 24 03:02:00 2017  
USER: nmr  
SOLVENT:  
Experiment = zg30  
Pulse length = 14.000 usec  
Recycle delay = 1.000 sec  
NA = 8  
PTSD = 32768  
F1 = 300.131866 MHz  
F2 = 1.000000 MHz  
SWH = 6188.12 Hz

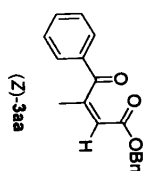

mdk-11-058-3-purity  
7 uL CH<sub>2</sub>Br<sub>2</sub> as internal standard  
in 12.0 mg sample

$$\text{purity} = \frac{0.2 \times 10.2078 \times 280.32}{12} \times 100\% = 97\%$$

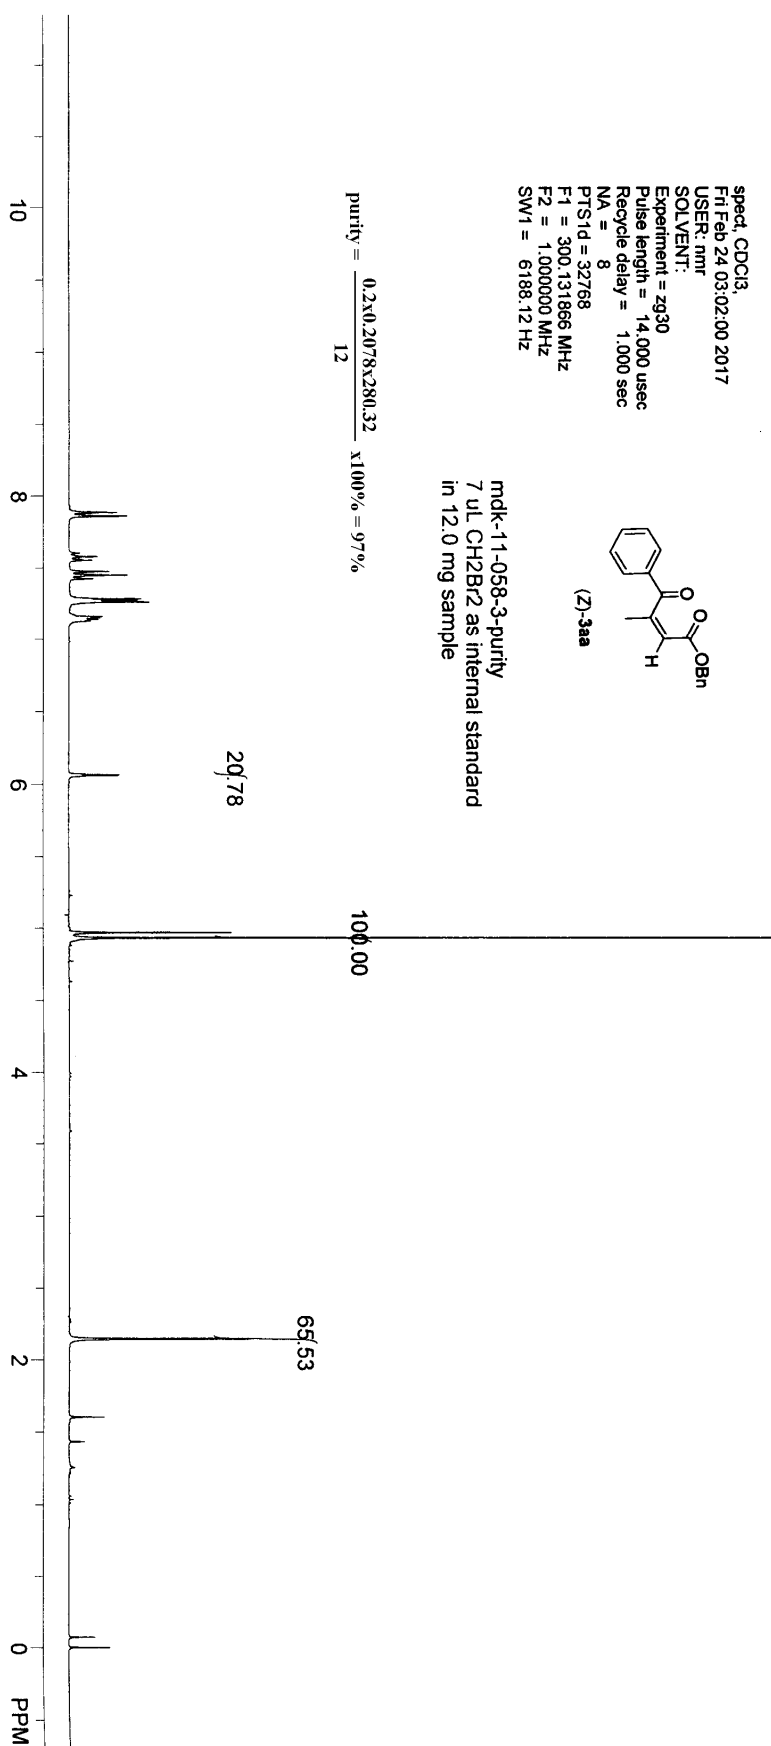

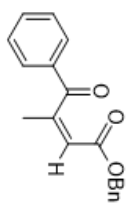

(Z)-3aa

mdk-11-058-3-noe

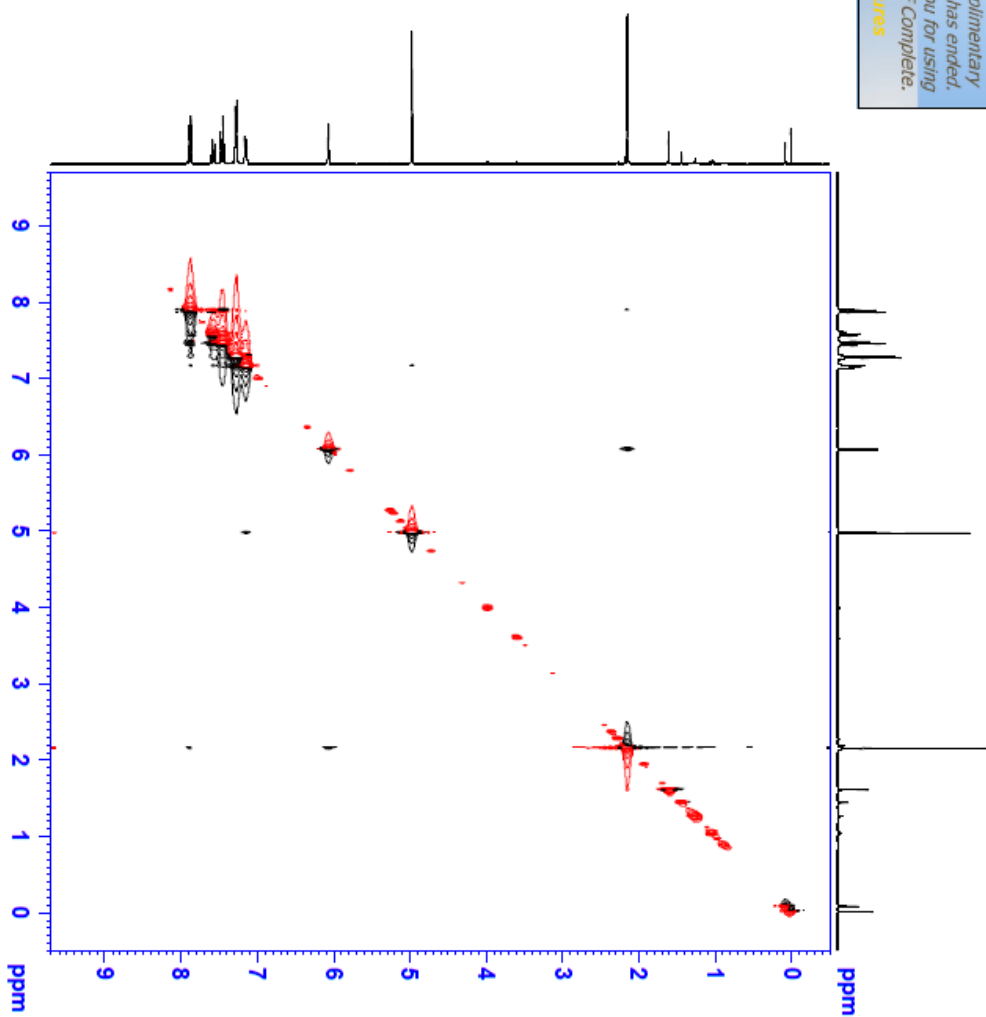

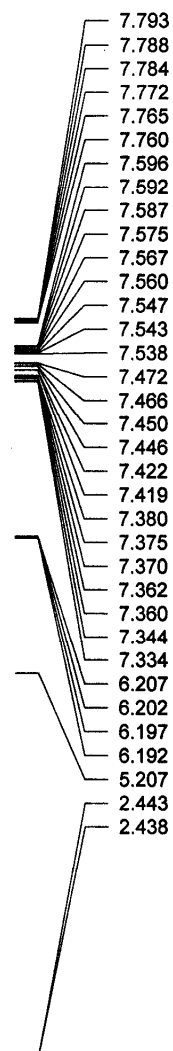

spect. CDCl<sub>3</sub>,  
Mon Apr 24 13:44:19 2017  
USER: nmf  
SOLVENT:  
Experiment = zg30  
Pulse length = 14.000 usec  
Recycle delay = 1.000 sec  
NA = 8  
PTsId = 32768  
F1 = 300.131866 MHz  
F2 = 1.000000 MHz  
SW1 = 6188.12 Hz

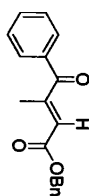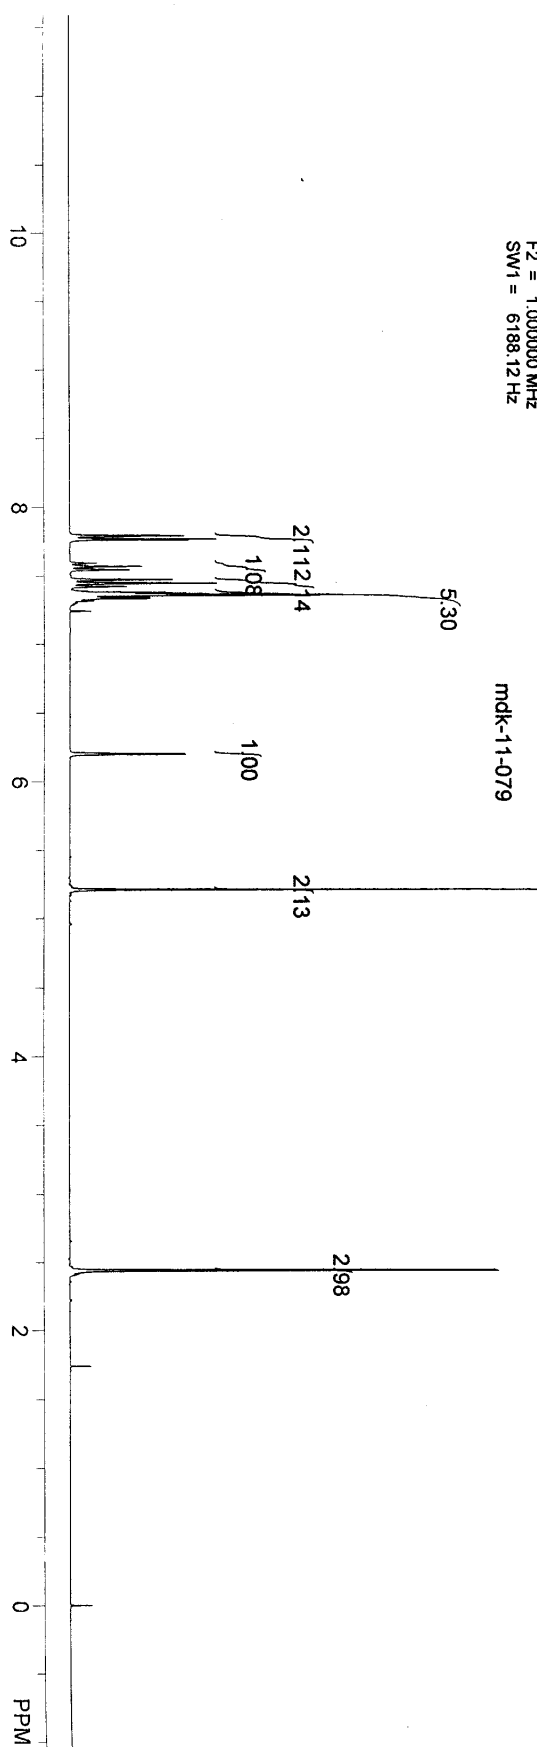

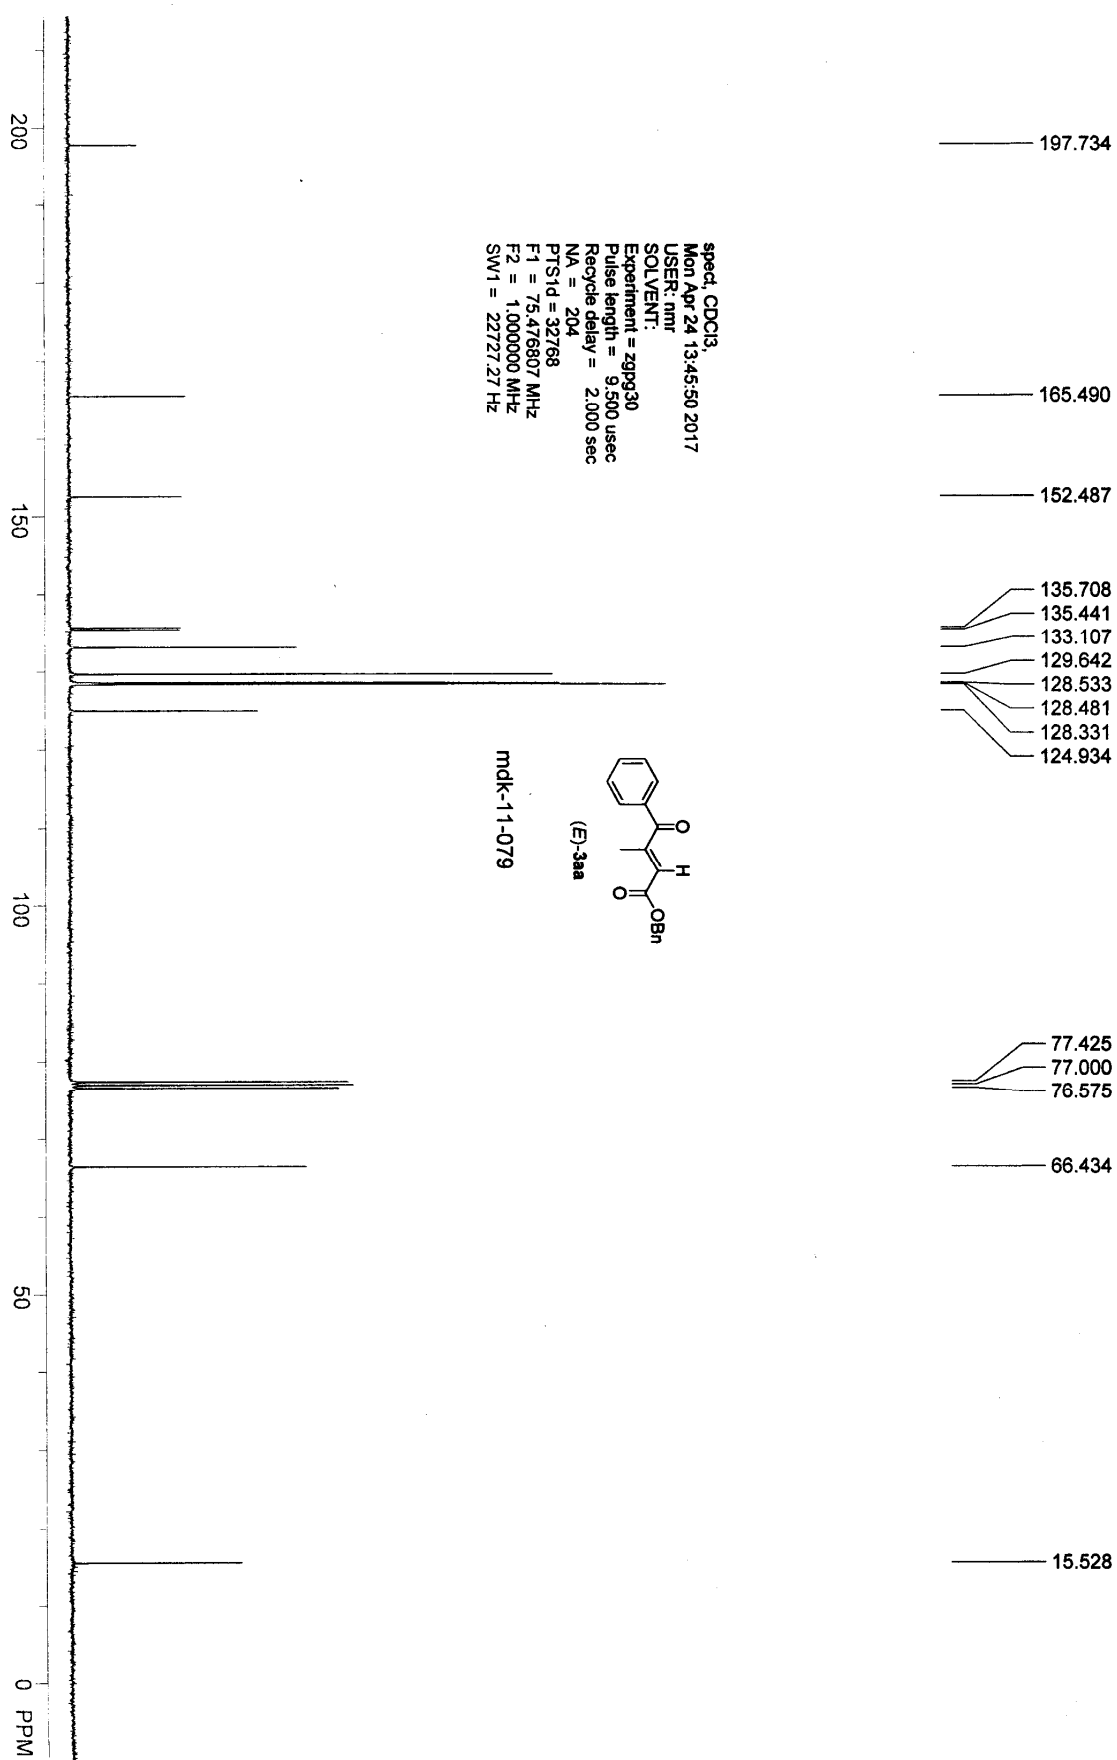

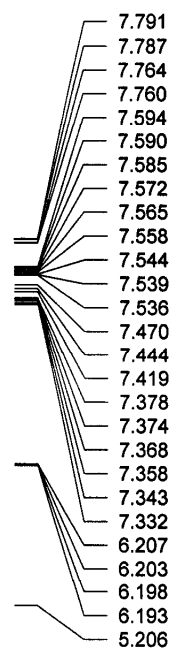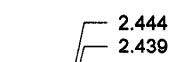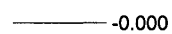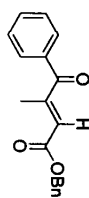

spec: CDCl<sub>3</sub>  
 Sun Apr 30 05:21:27 2017  
 USER: nmr  
 SOLVENT:  
 Experiment = zg30  
 Pulse length = 14.000 usec  
 Recycle delay = 1.000 sec  
 NA = 8  
 P1 = 32768  
 P1 = 300.131866 MHz  
 F2 = 1.000000 MHz  
 SW1 = 6188.12 Hz

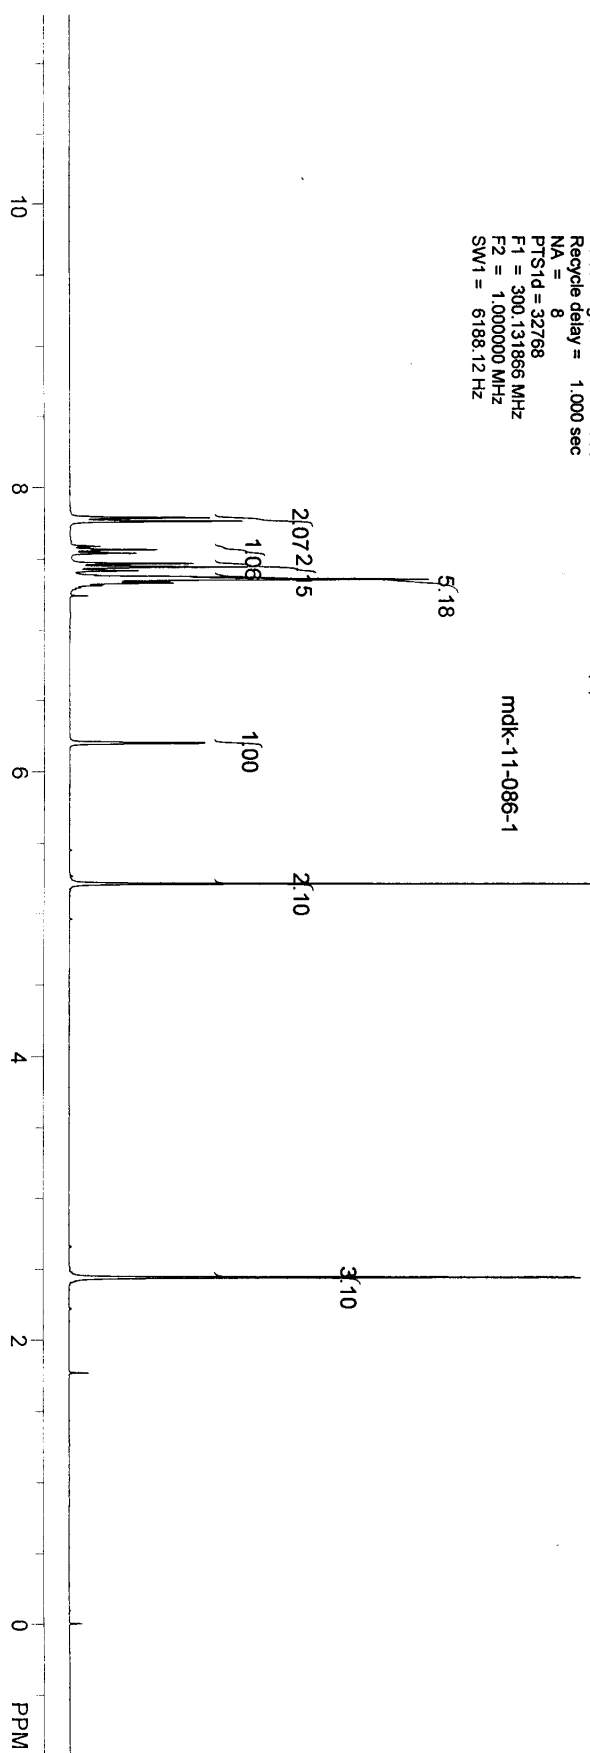



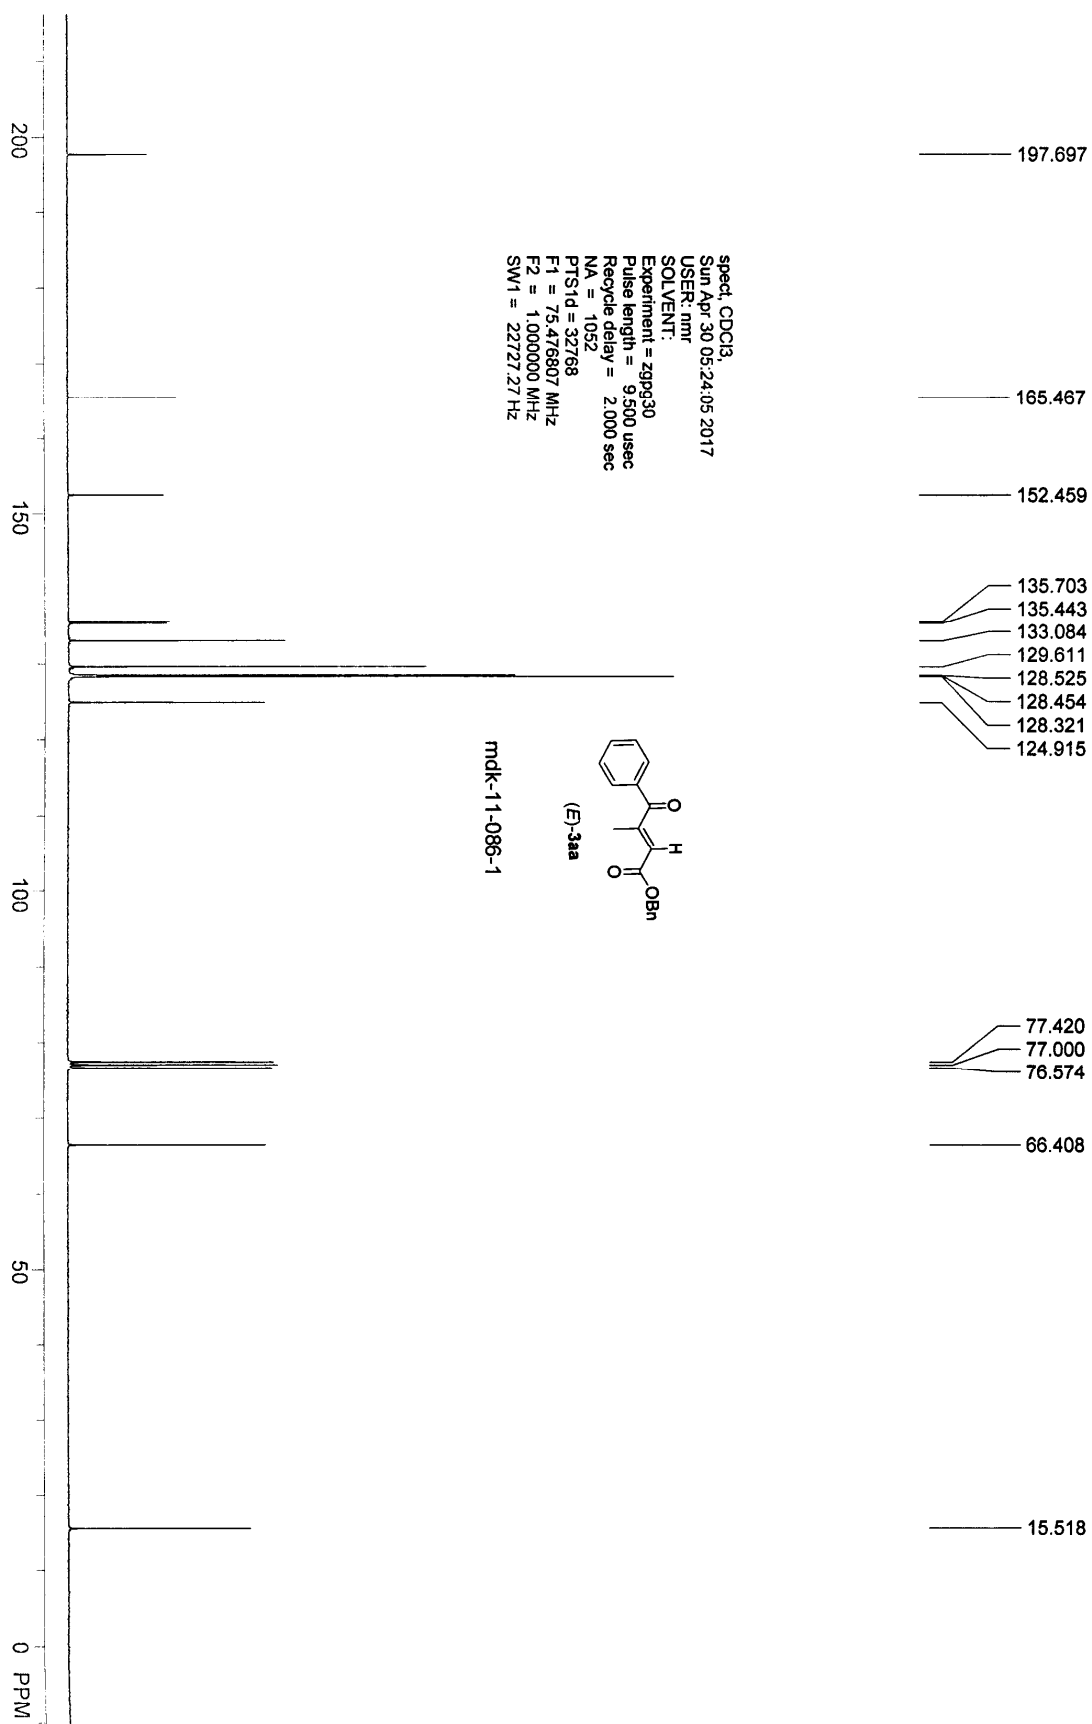

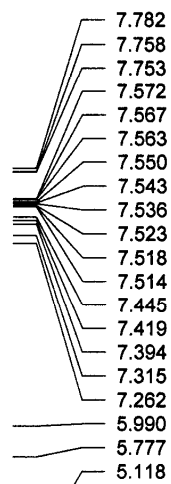

3.608

1.603

0.000

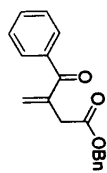

specd, CDCl<sub>3</sub>,  
Fri May 12 08:32:19 2017  
USER: nmf  
SOLVENT:  
Experiment = zg30  
Pulse length = 14,000 usec  
Recycle delay = 1,000 sec  
NA = 8  
PTSD = 32768  
F1 = 300.131866 MHz  
F2 = 1,000,000 MHz  
SW1 = 6188.12 Hz

mdk-11-086-2

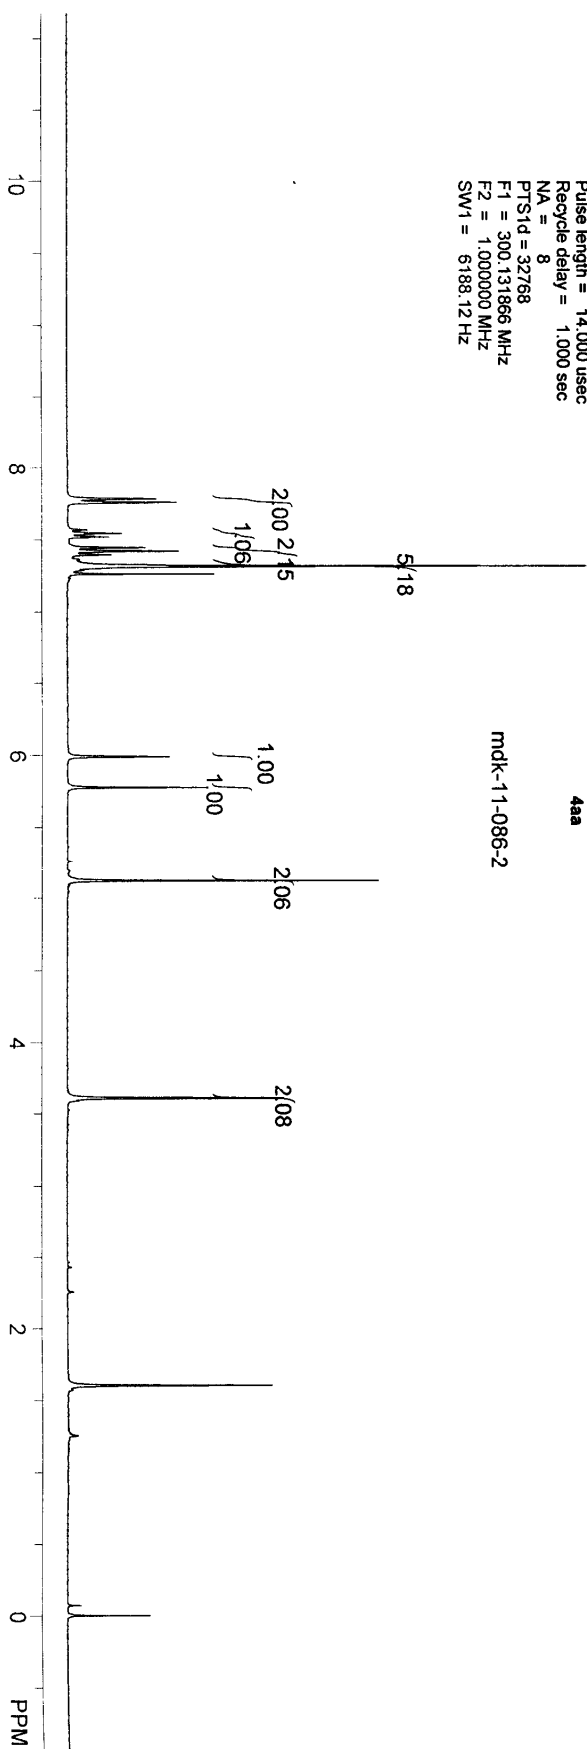

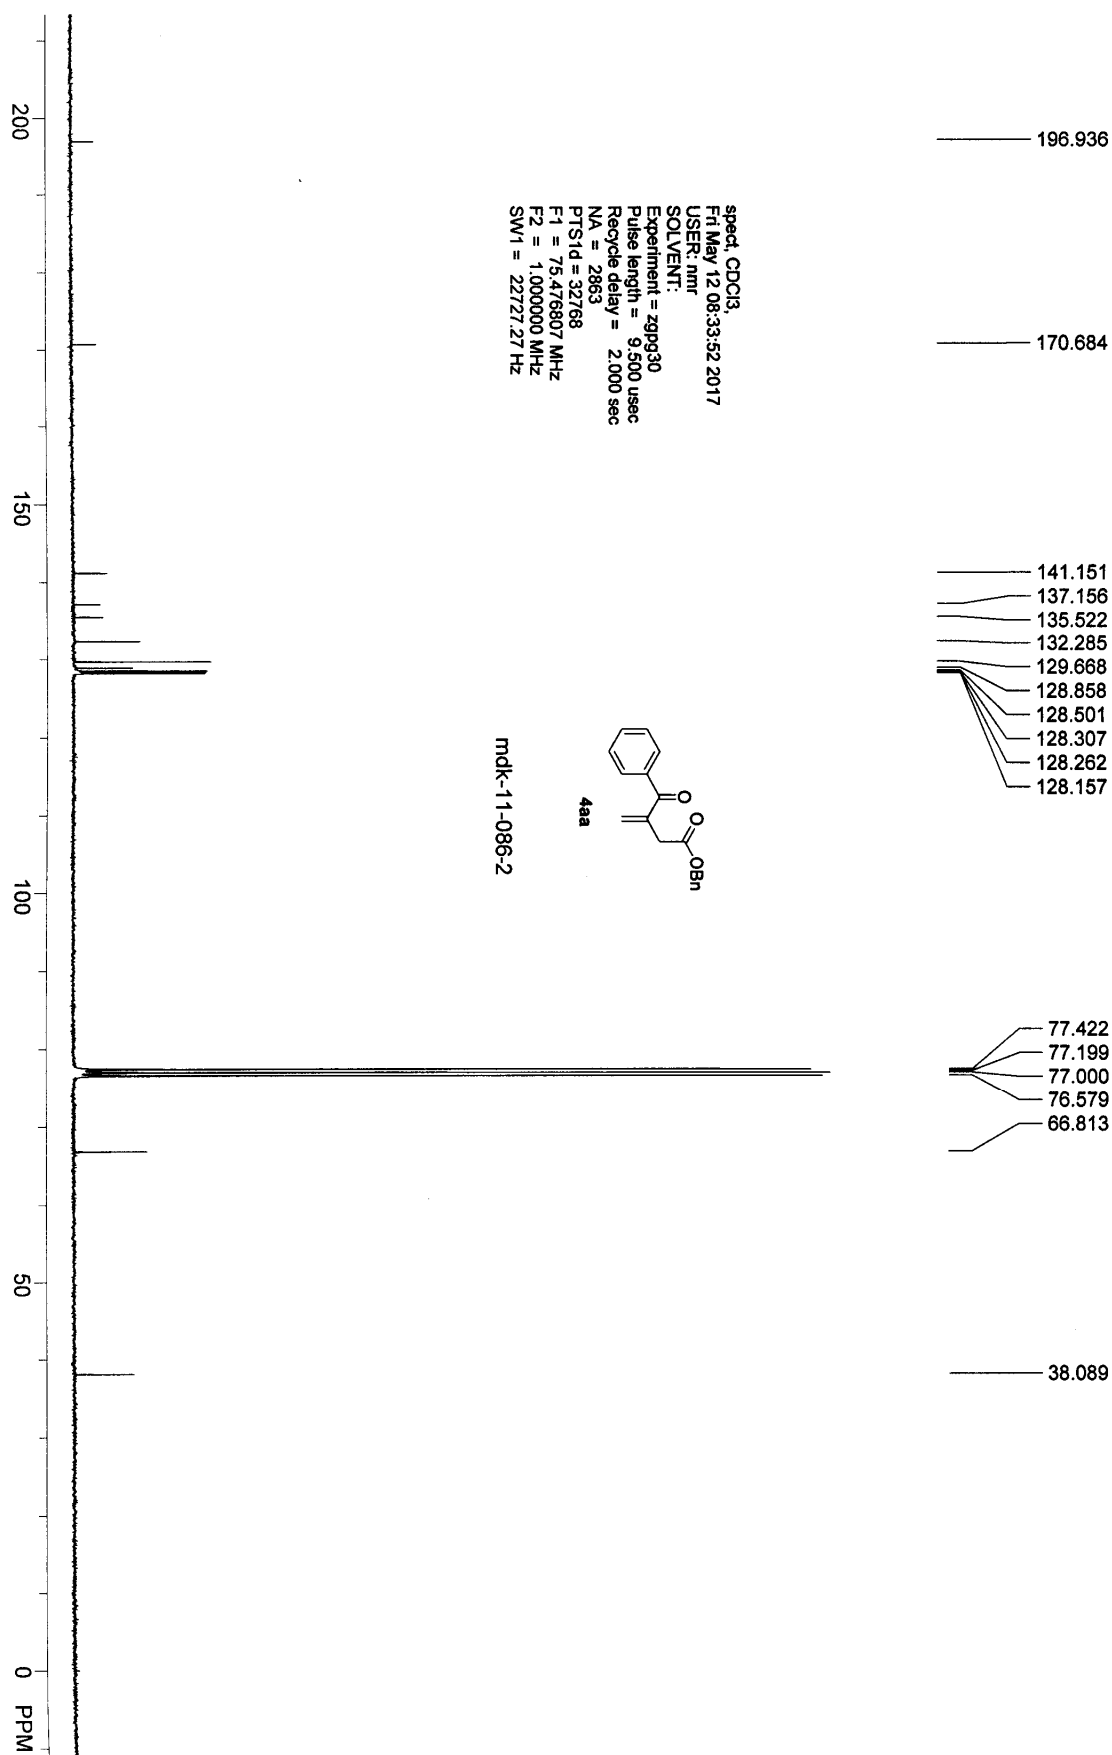

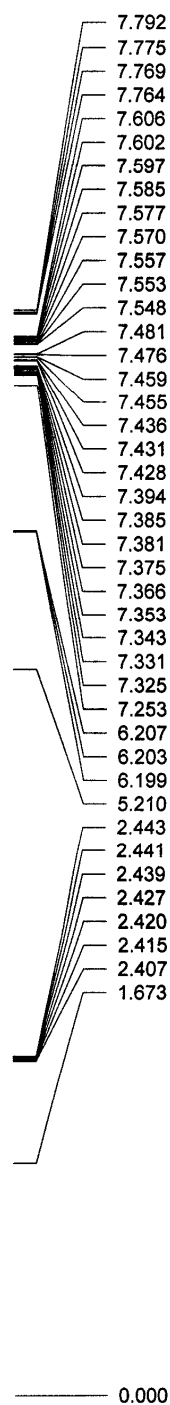

spec1, CDCl<sub>3</sub>,  
Tue May 23 06:51:27 2017  
USER: nmr  
SOLVENT:  
Experiment = zg30  
Pulse length = 14.000 usec  
Recycle delay = 1.000 sec  
NA = 8  
PTSD = 32768  
F1 = 300.131866 MHz  
F2 = 1.000000 MHz  
SWH = 6188.12 Hz

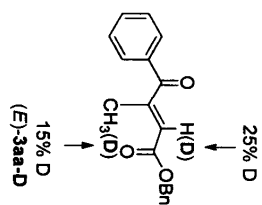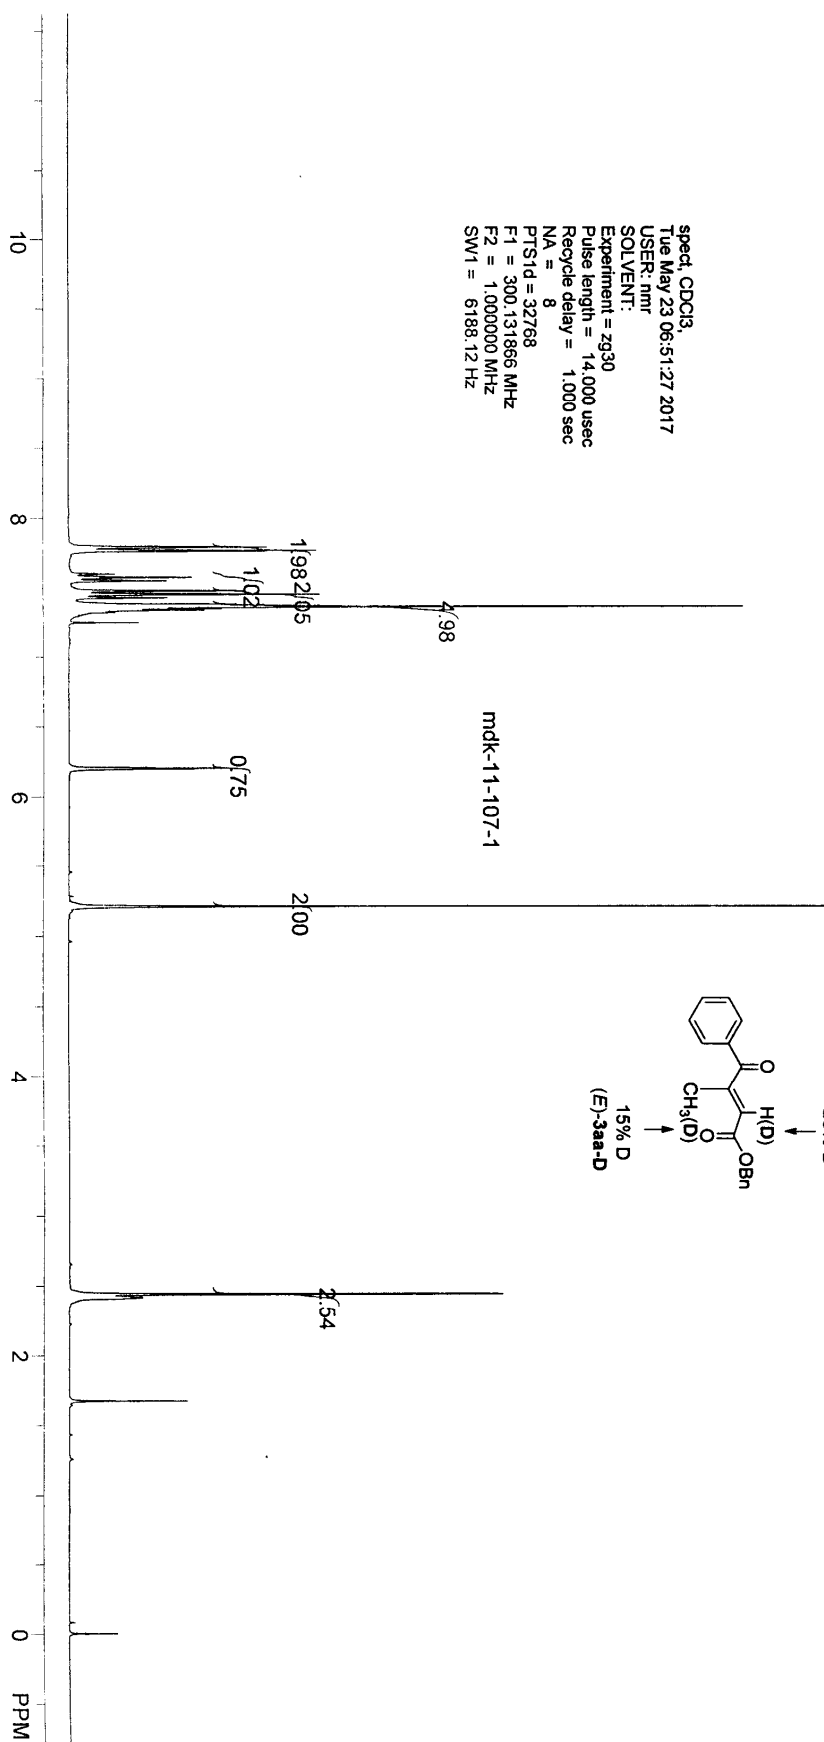

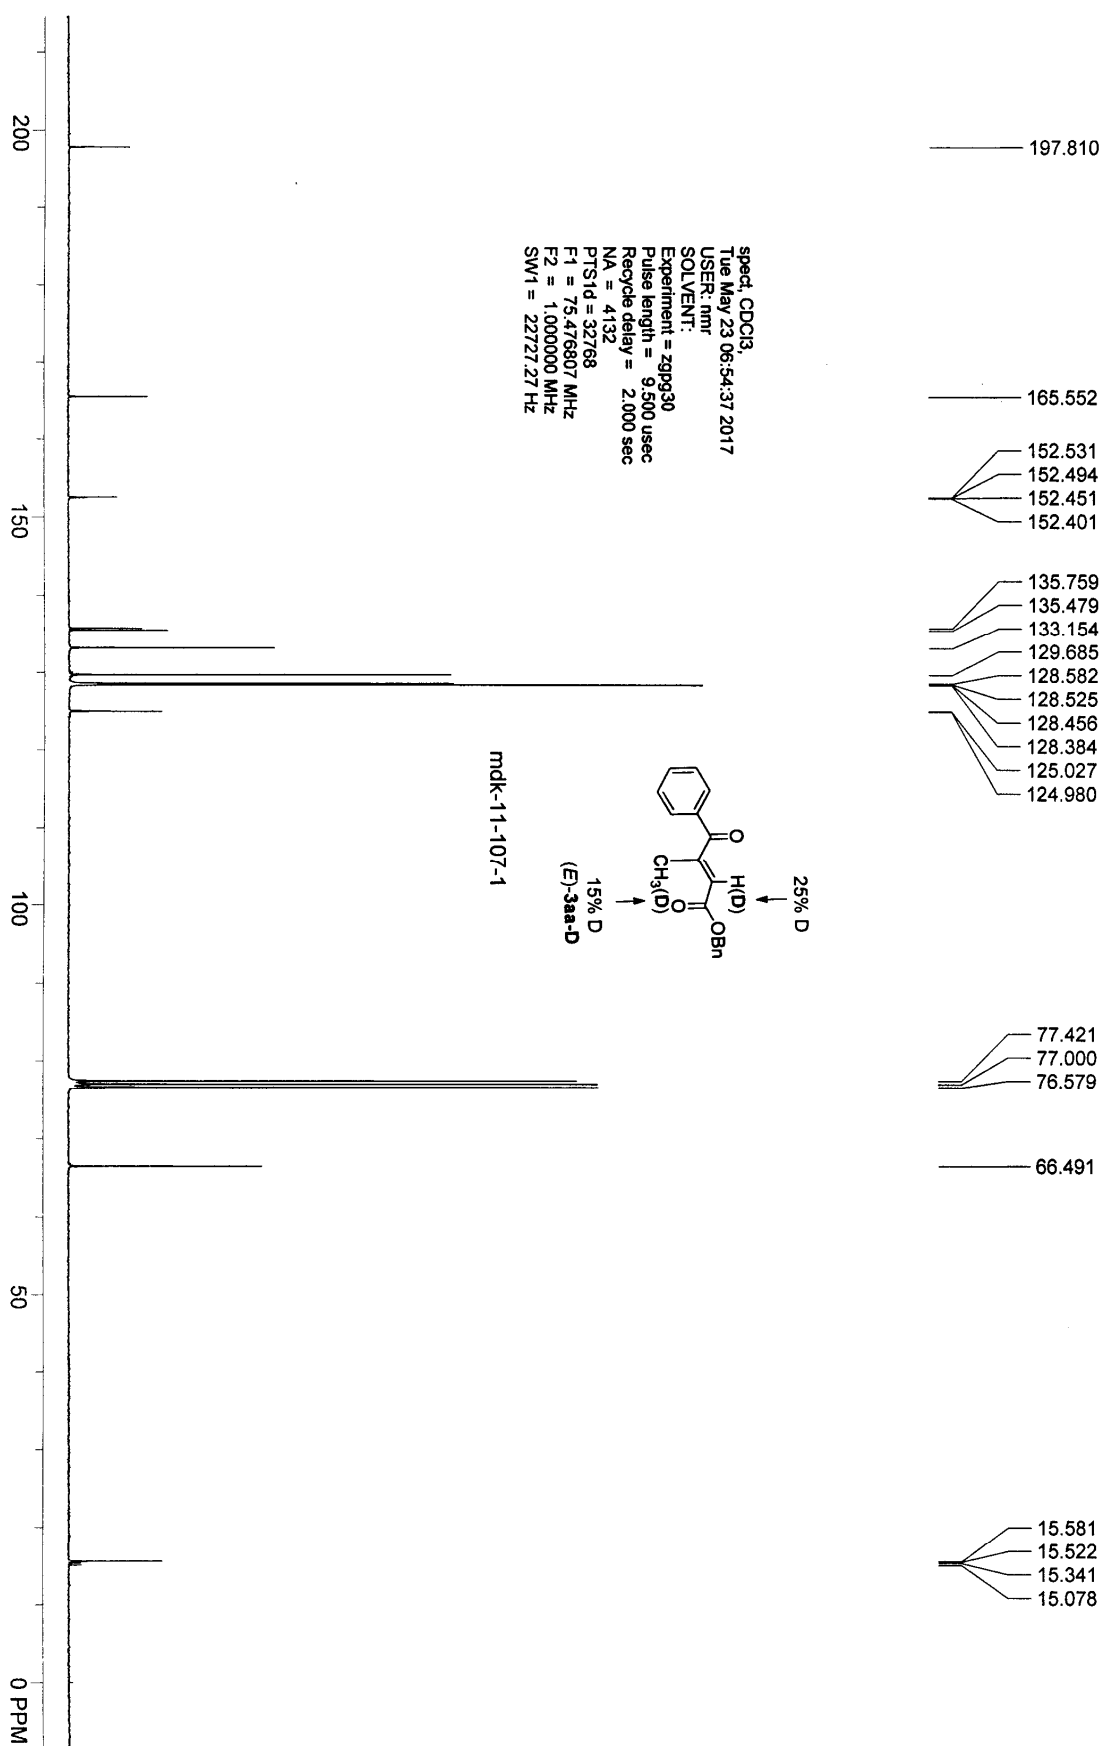

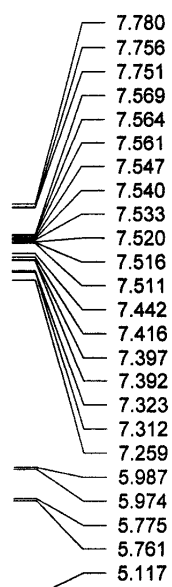

3.604

1.623

-0.000

Spec: CDCl<sub>3</sub>  
Tue May 23 11:02:06 2017  
USER: nmf  
SOLVENT: nmf  
Experiment = zg30  
Pulse length = 14.000 usec  
Recycle delay = 1.000 sec  
NA = 8  
PTSD = 32768  
F1 = 300.131866 MHz  
F2 = 1.000000 MHz  
SWH = 6188.12 Hz

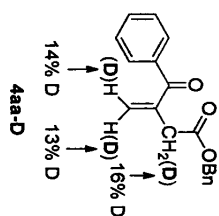

mdk-11-107-2

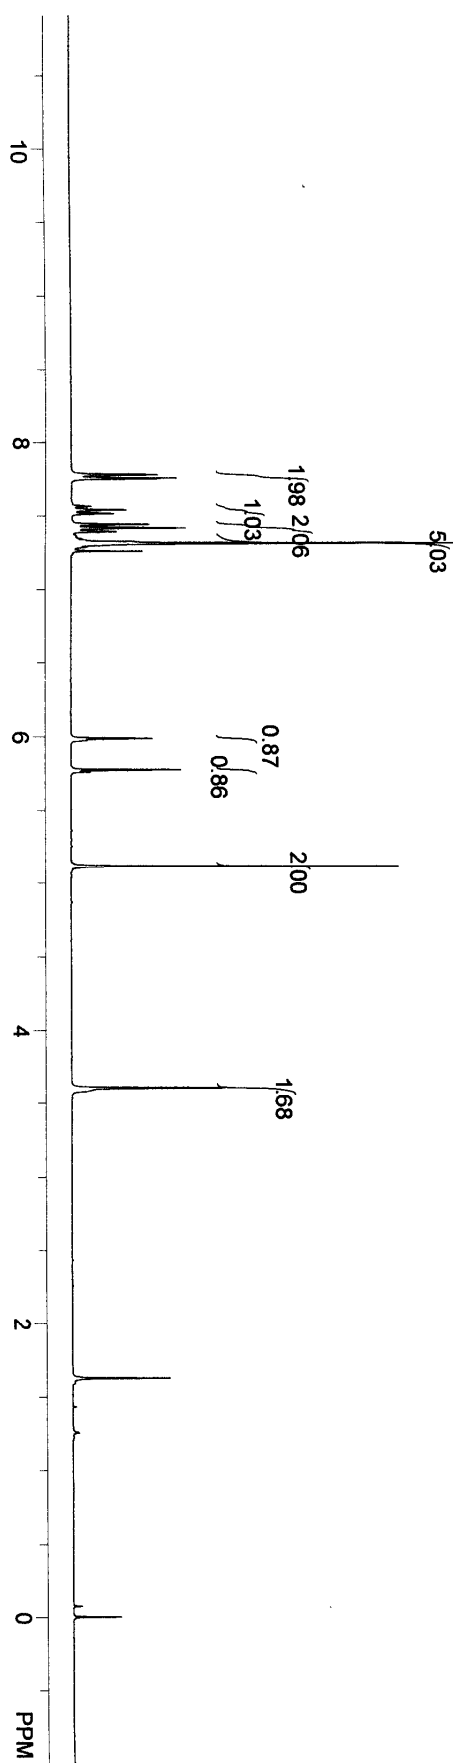

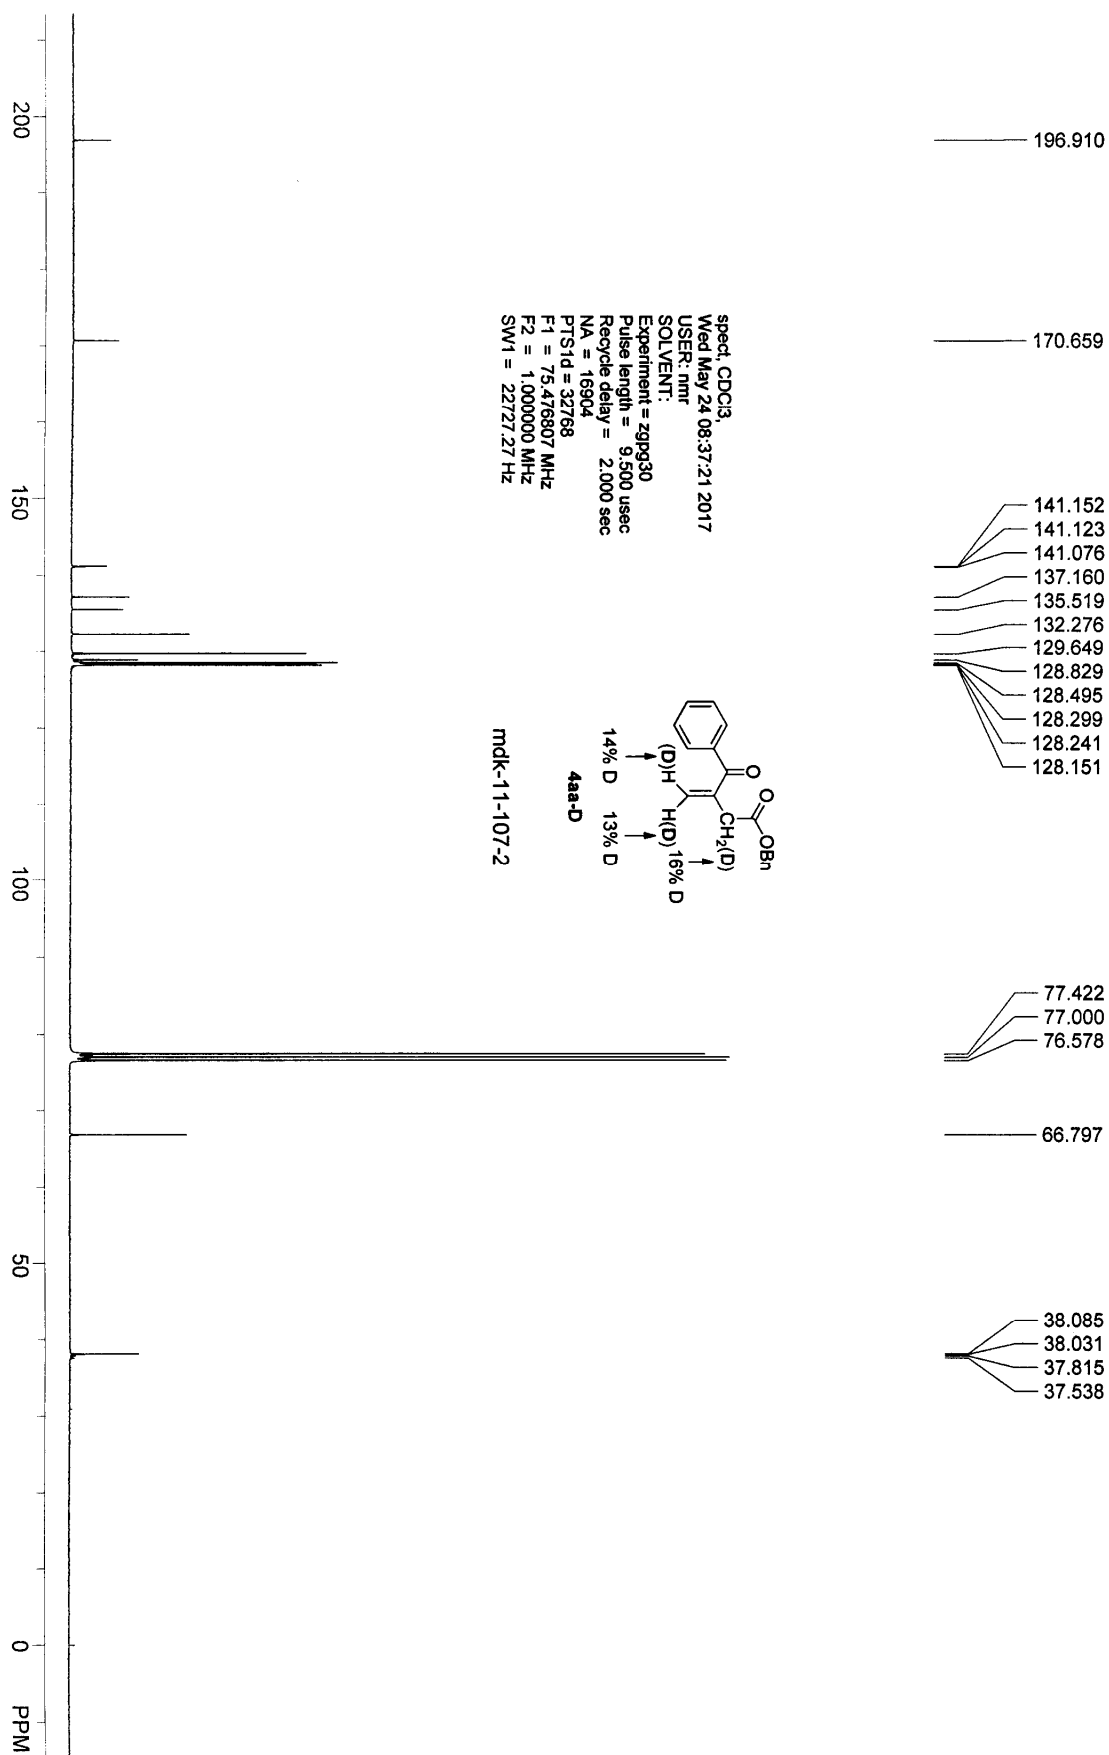

Instrument: Agilent UHD Accurate Mass Q-TOF LC-MS

Sample Serial Number: mdk-11-107-2

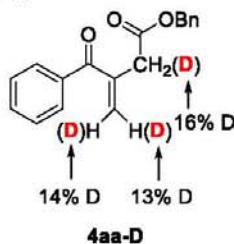

Operator: Wang, Jiawei

Date: 2018/05/22

Operation Mode: ESI-Positive

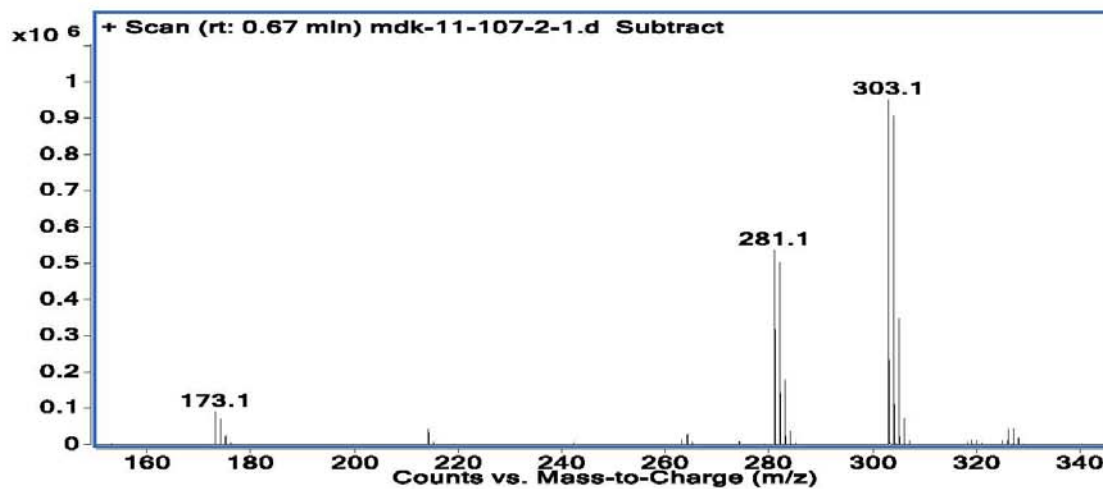



Instrument: Agilent UHD Accurate Mass Q-TOF LC-MS

Sample Serial Number: mdk-11-107-2

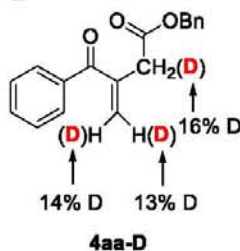

Operator: Wang, Jiawei

Date: 2018/05/22

Operation Mode: ESI-Positive

Single Mass Analysis

Tolerance = 5.0 ppm / DBE: min = 0, max = 50.0

C: 0-80; H: 0-100; O: 0-10; Na: 0-1; D: 0-5

| Formula (M)                                    | m/z      | m/z (Calc) | Diff (ppm) | DBE  |
|------------------------------------------------|----------|------------|------------|------|
| C <sub>18</sub> H <sub>17</sub> O <sub>3</sub> | 281.1175 | 281.1172   | -0.99      | 10.5 |

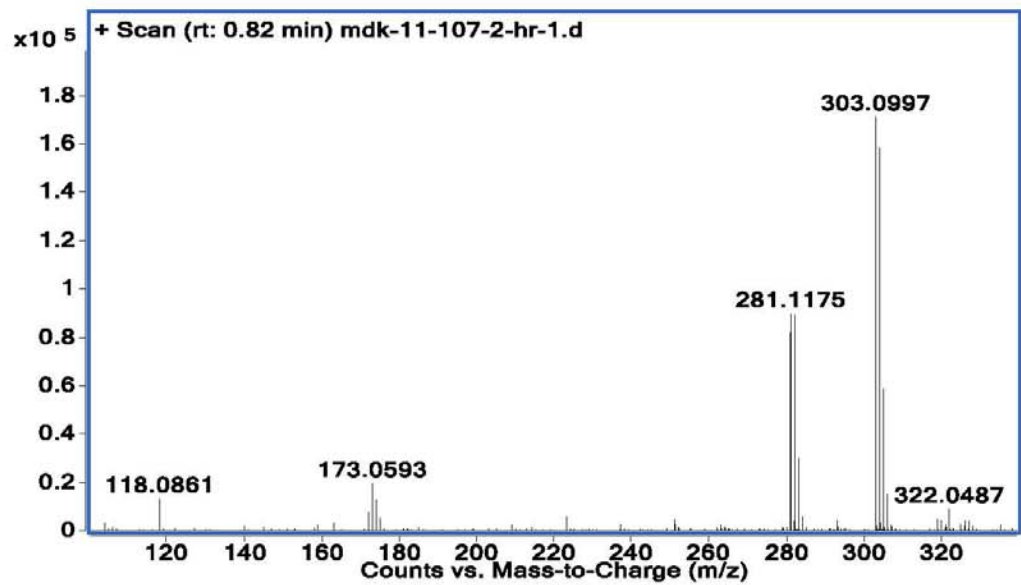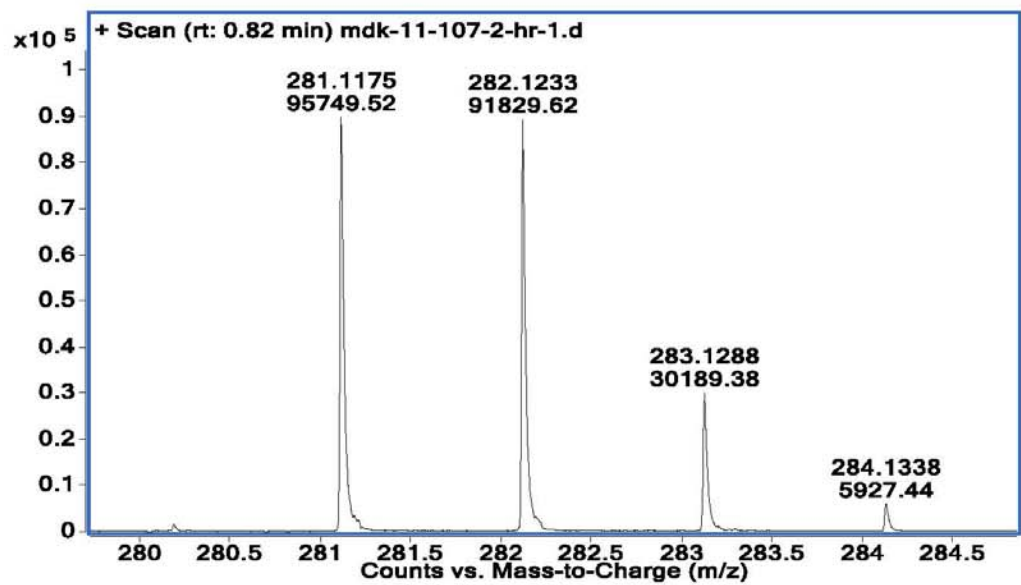

Reference ions:  $m/z$  118.0861 (calc.118.0863);  $m/z$  322.0487 (calc.322.0481)

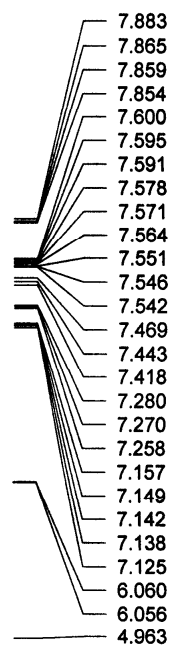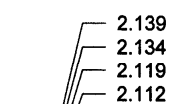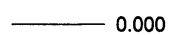

spec4, CDCl<sub>3</sub>,  
Wed May 24 03:17:17 2017  
USER: nmf  
SOLVENT:  
Experiment = zg30  
Pulse length = 14.000 usec  
Recycle delay = 1.000 sec  
NA = 8  
PTSD = 32768  
F1 = 300.131866 MHz  
F2 = 1.000000 MHz  
SWM = 6188.12 Hz

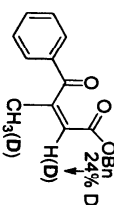

mdk-11-107-3

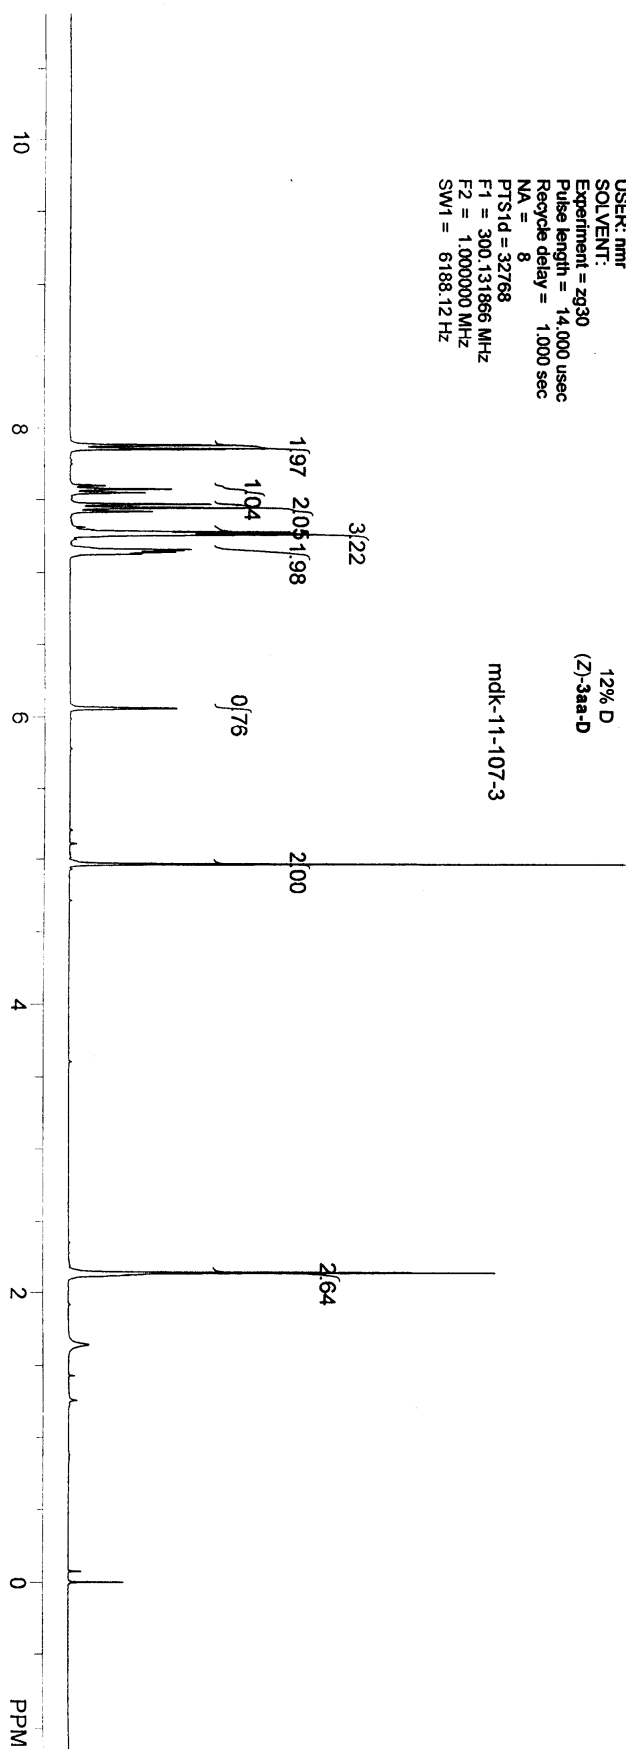

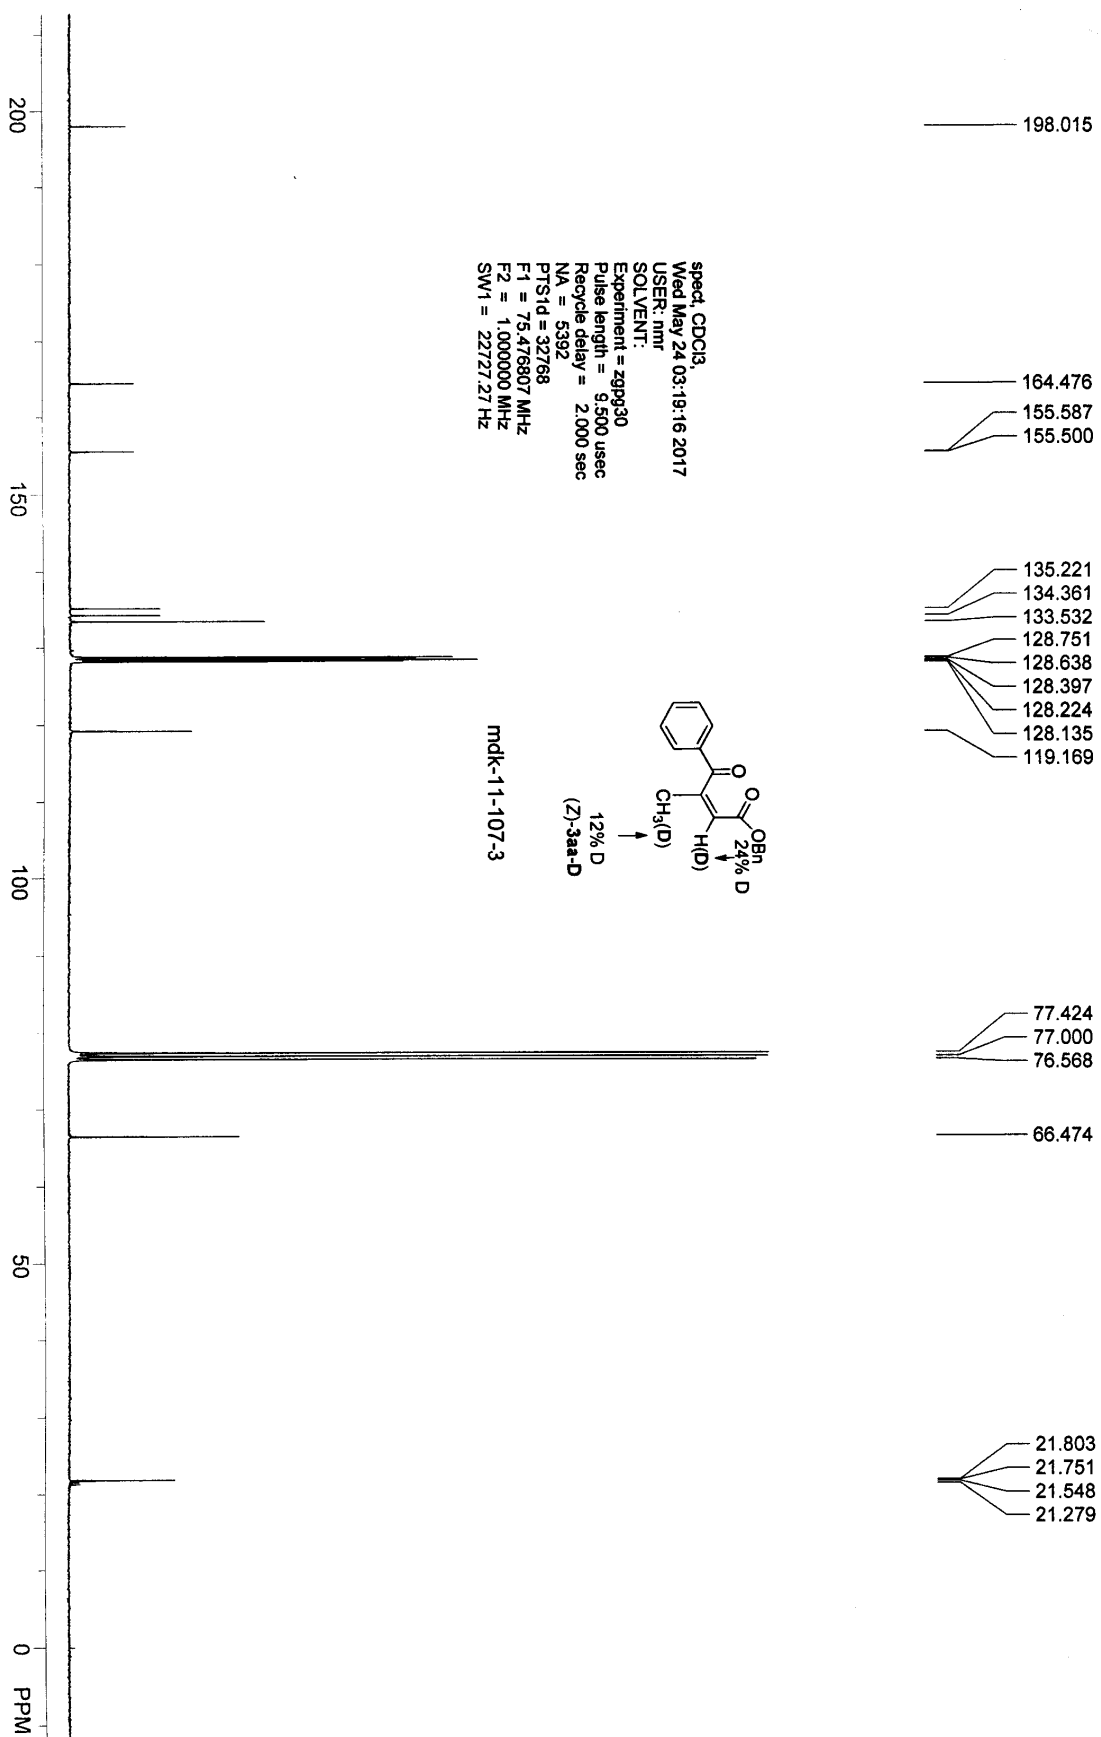

National Center for Organic Mass Spectrometry in Shanghai  
Shanghai Institute of Organic Chemistry  
Chinese Academic of Sciences  
MS DATA REPORT

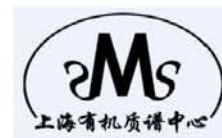

Instrument: Agilent UHD Accurate Mass Q-TOF LC-MS

Sample Serial Number: mdk-11-107-3

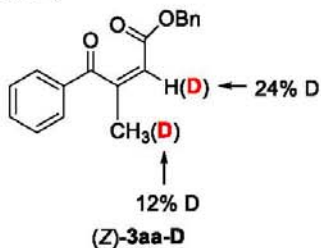

Operator: Wang, Jiawei

Date: 2018/05/22

Operation Mode: ESI-Positive

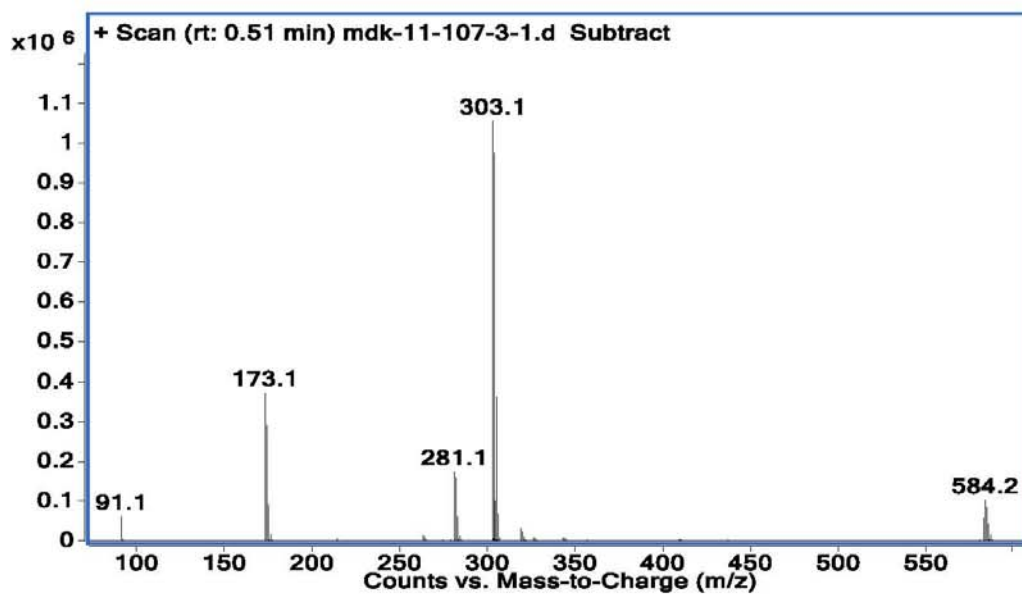

National Center for Organic Mass Spectrometry in Shanghai  
Shanghai Institute of Organic Chemistry  
Chinese Academic of Sciences  
HIGH RESOLUTION MS REPORT

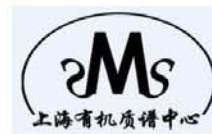

Instrument: Agilent UHD Accurate Mass Q-TOF LC-MS

Sample Serial Number: mdk-11-107-3

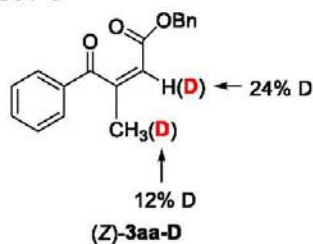

Operator: Wang, Jiawei

Date: 2018/05/22

Operation Mode: ESI-Positive

Single Mass Analysis

Tolerance = 5.0 ppm / DBE: min = 0, max = 50.0

C: 0-80; H: 0-100; O: 0-10; Na: 0-1; D: 0-5

| Formula (M)                                                    | m/z      | m/z (Calc) | Diff (ppm) | DBE  |
|----------------------------------------------------------------|----------|------------|------------|------|
| ▶ C <sub>18</sub> H <sub>17</sub> O <sub>3</sub>               | 281.1172 | 281.1172   | 0.07       | 10.5 |
| C <sub>11</sub> H <sub>13</sub> D <sub>4</sub> O <sub>8</sub>  | 281.1172 | 281.1169   | -1.06      | 3.5  |
| C <sub>9</sub> H <sub>18</sub> D <sub>2</sub> NaO <sub>8</sub> | 281.1172 | 281.1176   | 1.4        | -0.5 |
| C <sub>9</sub> H <sub>16</sub> D <sub>3</sub> NaO <sub>8</sub> | 281.1172 | 281.116    | -4.11      | 0    |
| C <sub>11</sub> H <sub>15</sub> D <sub>3</sub> O <sub>8</sub>  | 281.1172 | 281.1184   | 4.44       | 3    |

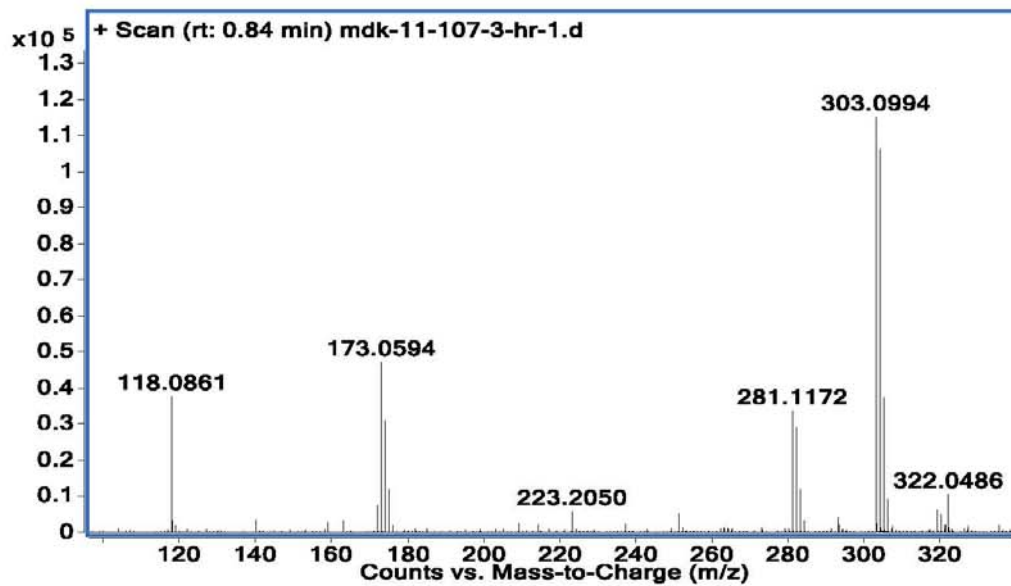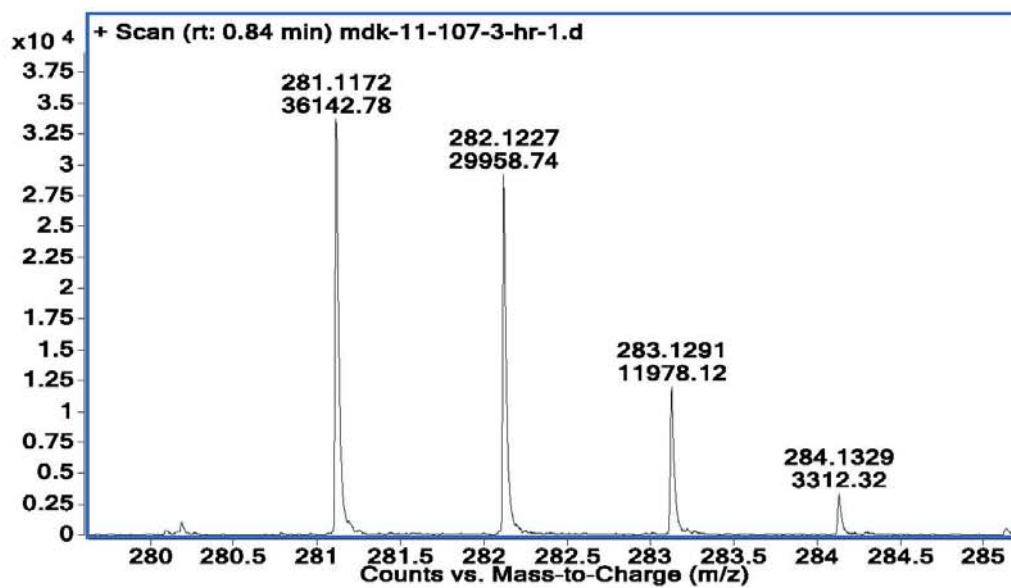

Reference ions:  $m/z$  118.0861 (calc.118.0863);  $m/z$  322.0486 (calc.322.0481)

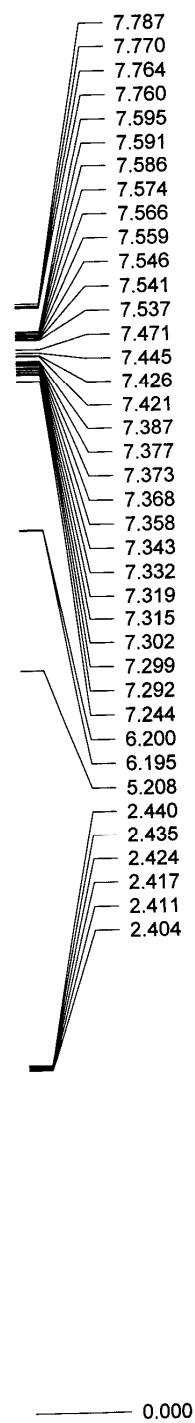

hx-16-162-1

2018-06-28 09:11:20.546

USER: nmr

SOLVENT: CDCl<sub>3</sub>

Experiment = zg30

Pulse length = 14.000 usec

Relaxation delay = 1.000 sec

NA = 8

Solvent = CDCl<sub>3</sub>

PTSD = 32768

F1 = 300.130005 MHz

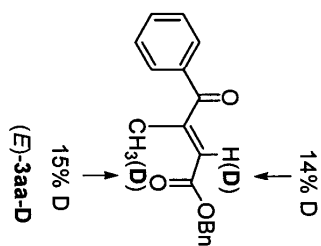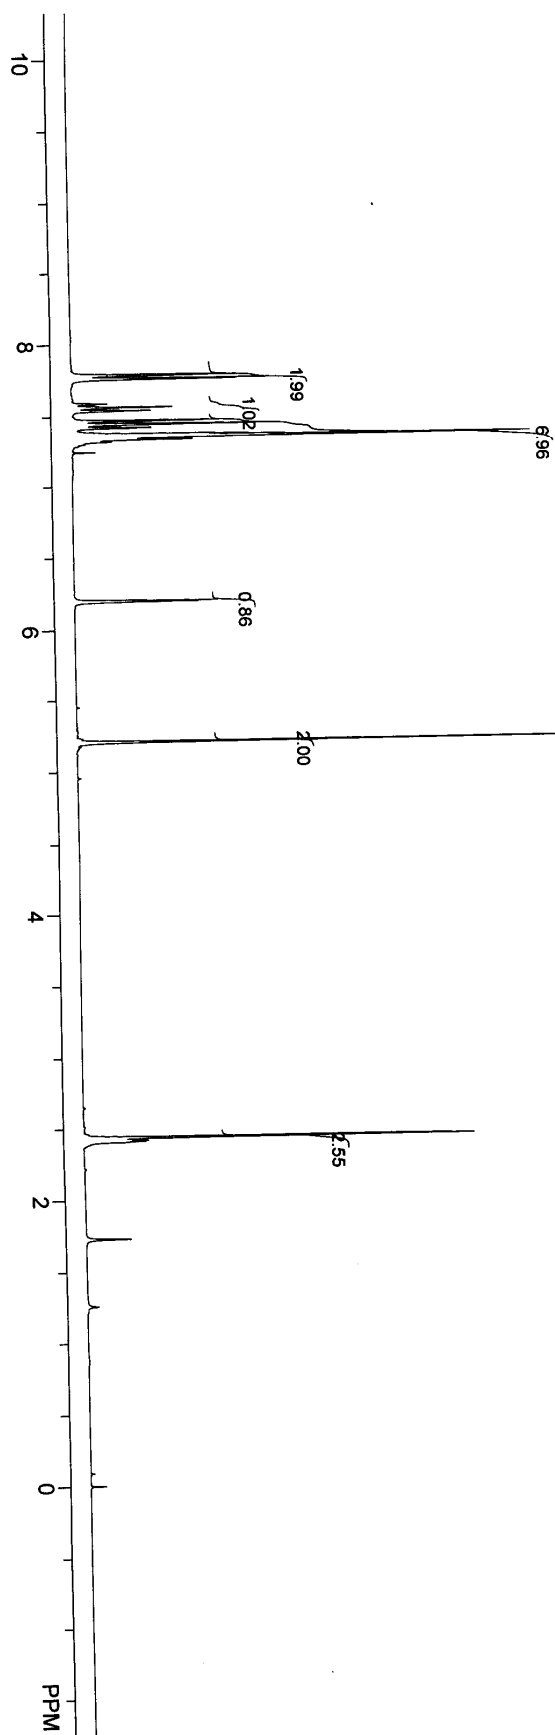



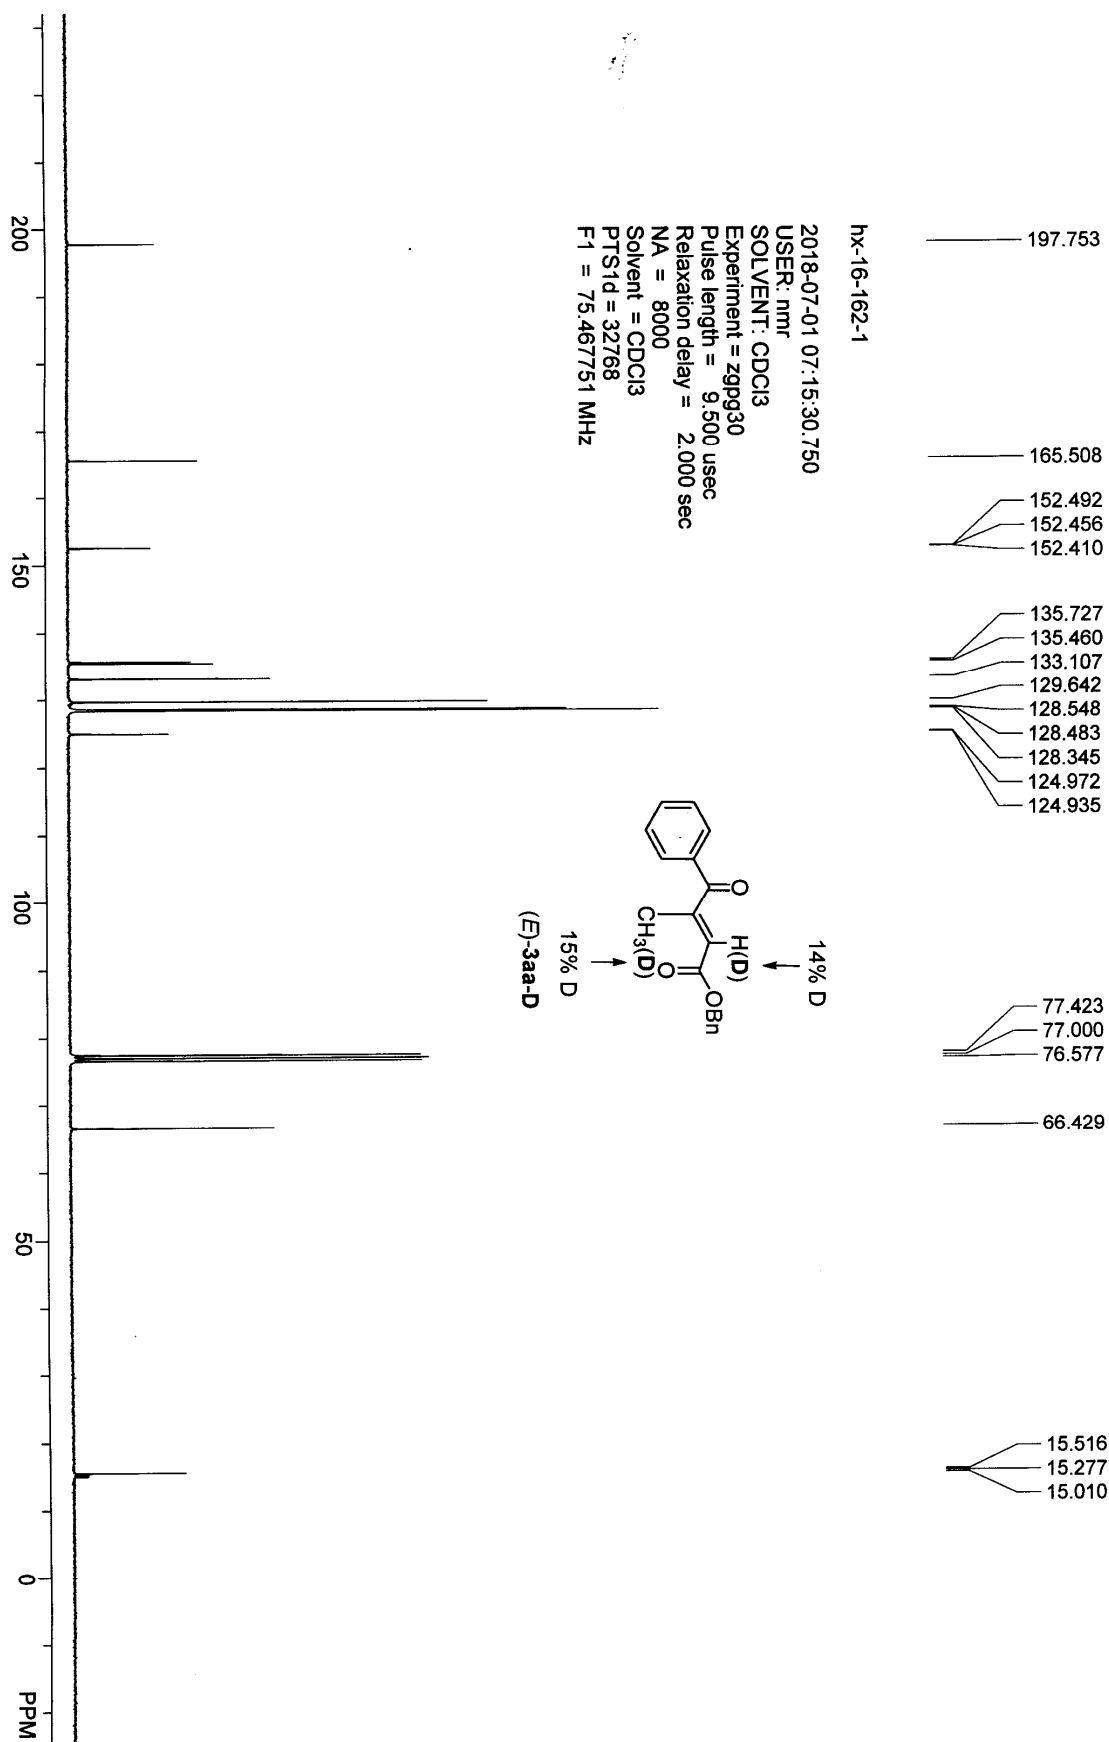

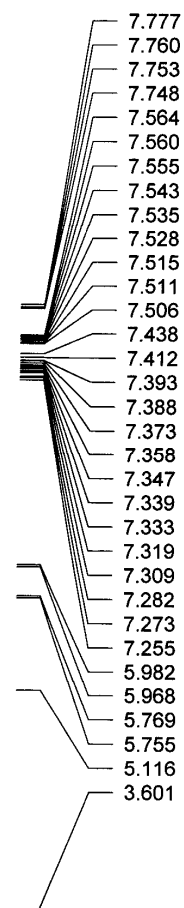

-0.000

hx-16-162-2

2018-06-28 14:49:33.750  
USER: nmr  
SOLVENT: CDCl<sub>3</sub>  
Experiment = zg30  
Pulse length = 14.000 usec  
Relaxation delay = 1.000 sec  
NA = 8  
Solvent = CDCl<sub>3</sub>  
PTSD = 32768  
F1 = 300.130005 MHz

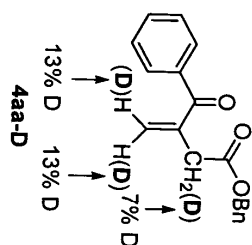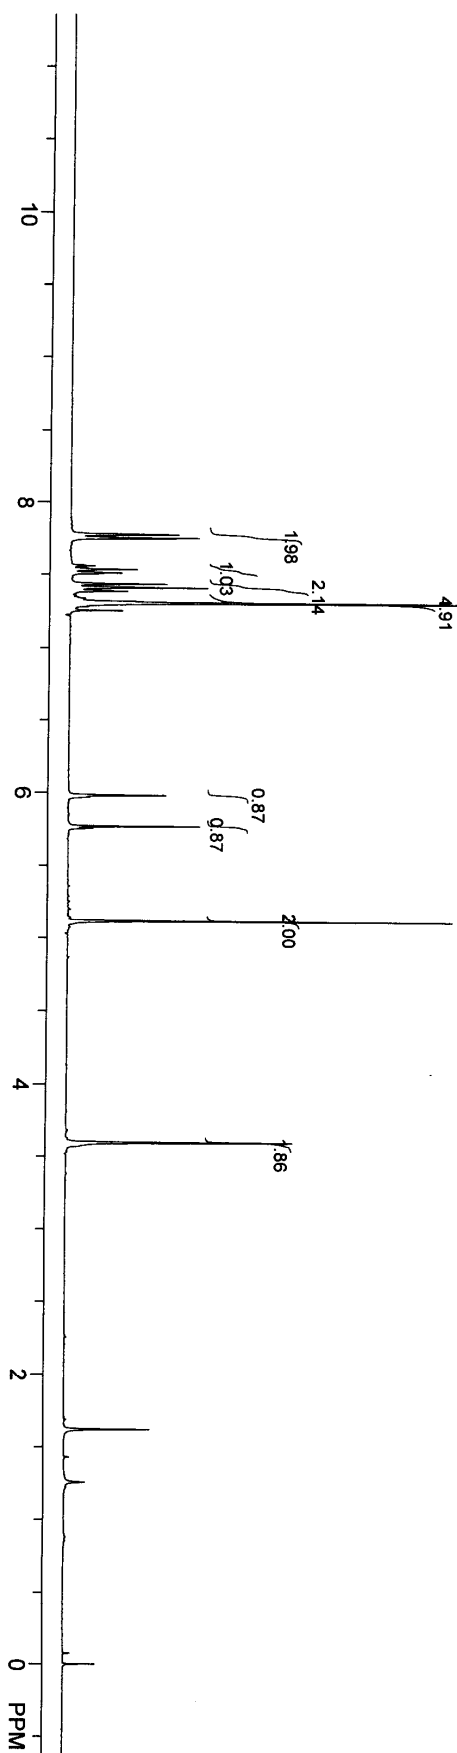

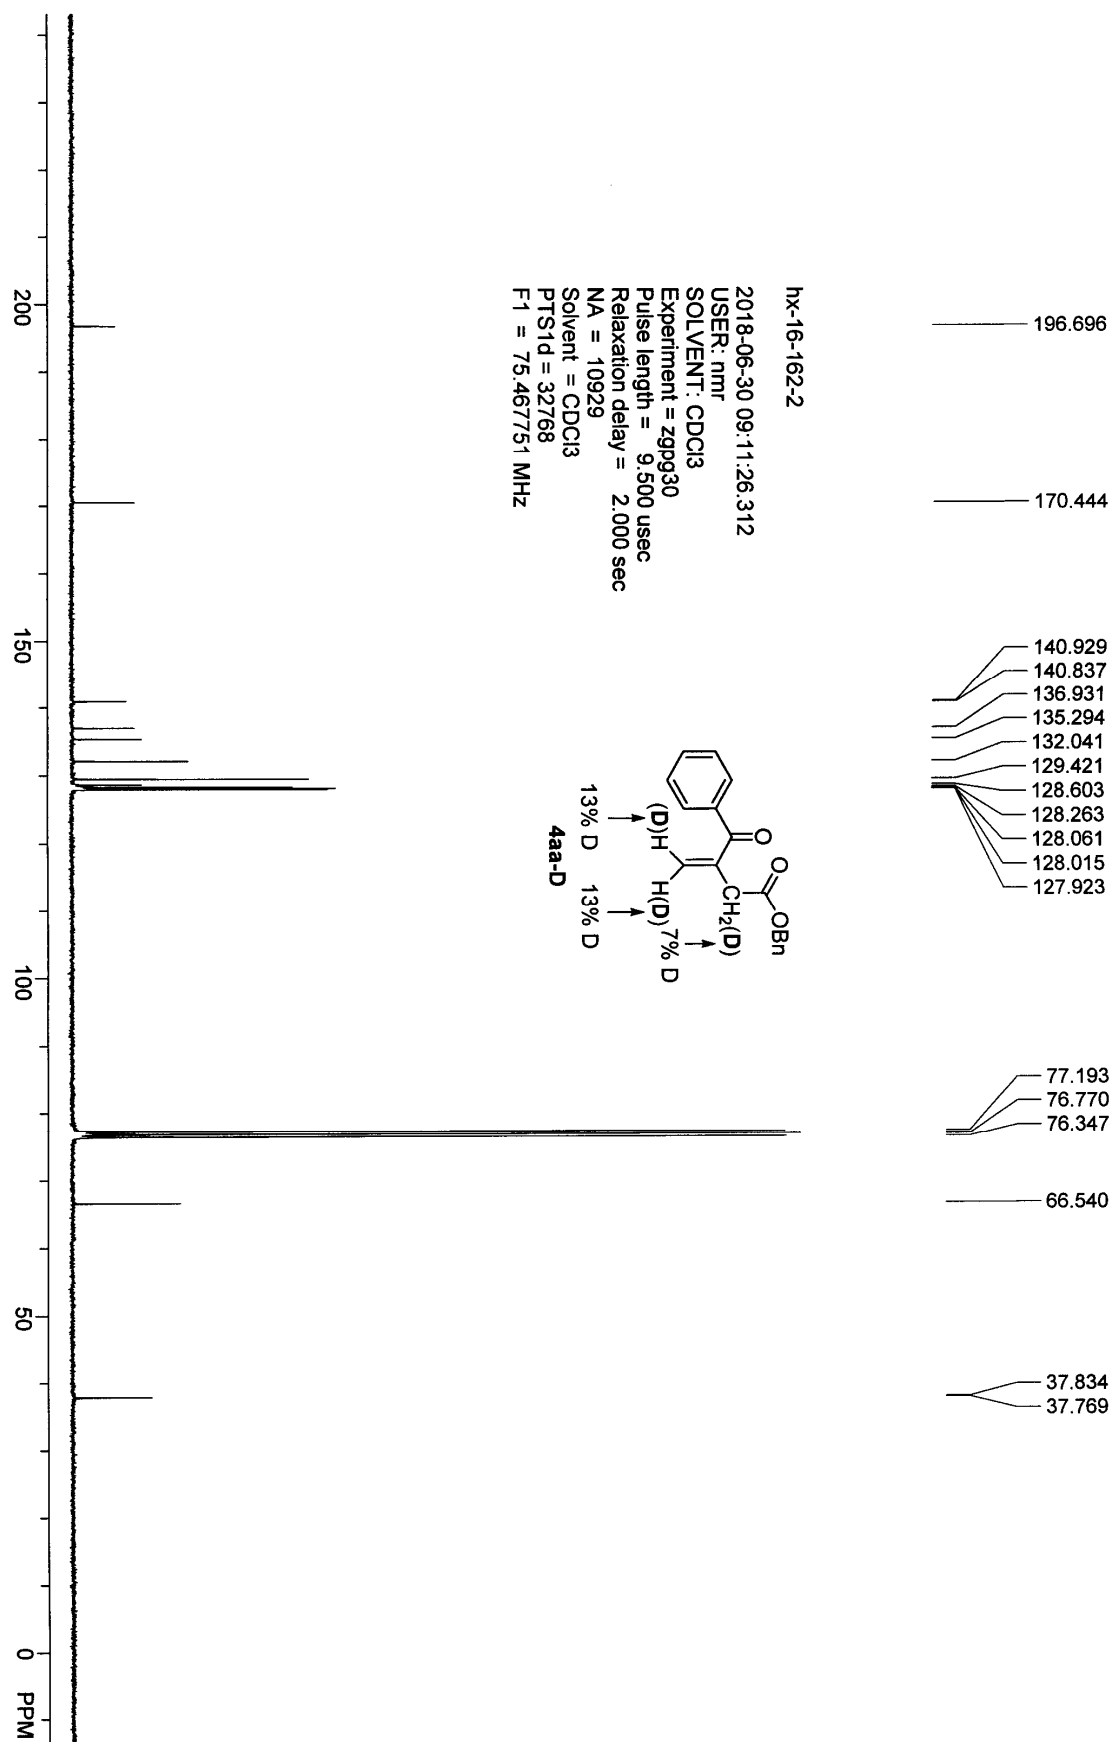

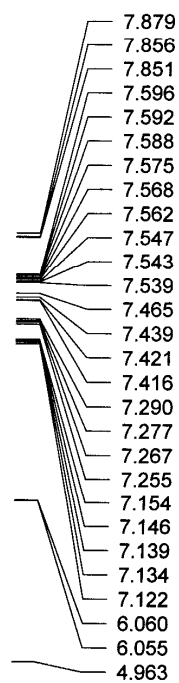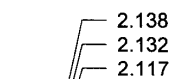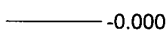

hx-16-162-3

2018-06-28 20:52:58.000

USER: nmr

SOLVENT: CDCl3

Experiment = zg30

Pulse length = 14.000 usec

Relaxation delay = 1.000 sec

NA = 8

Solvent = CDCl3

PTSD = 32768

F1 = 300.130005 MHz

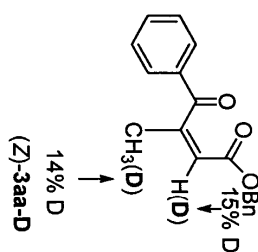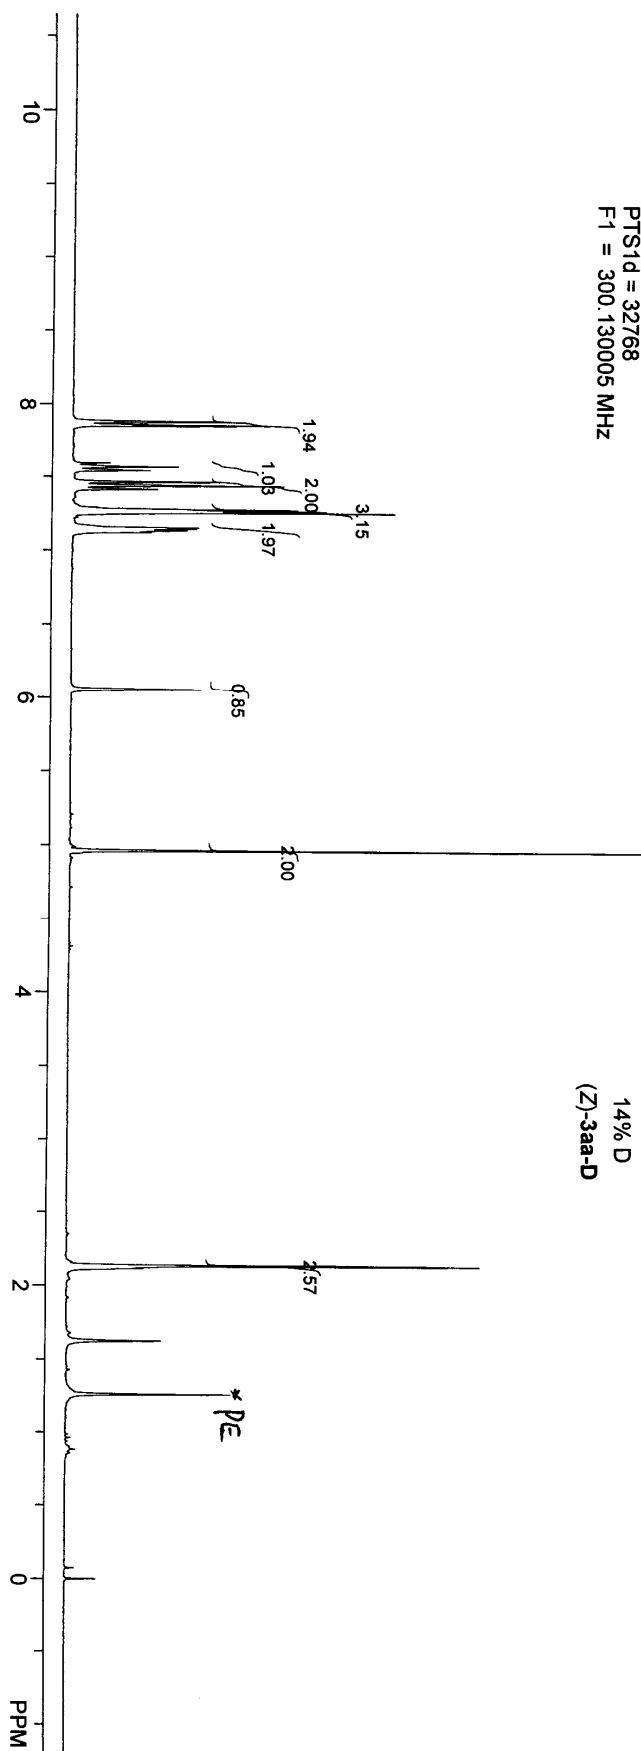

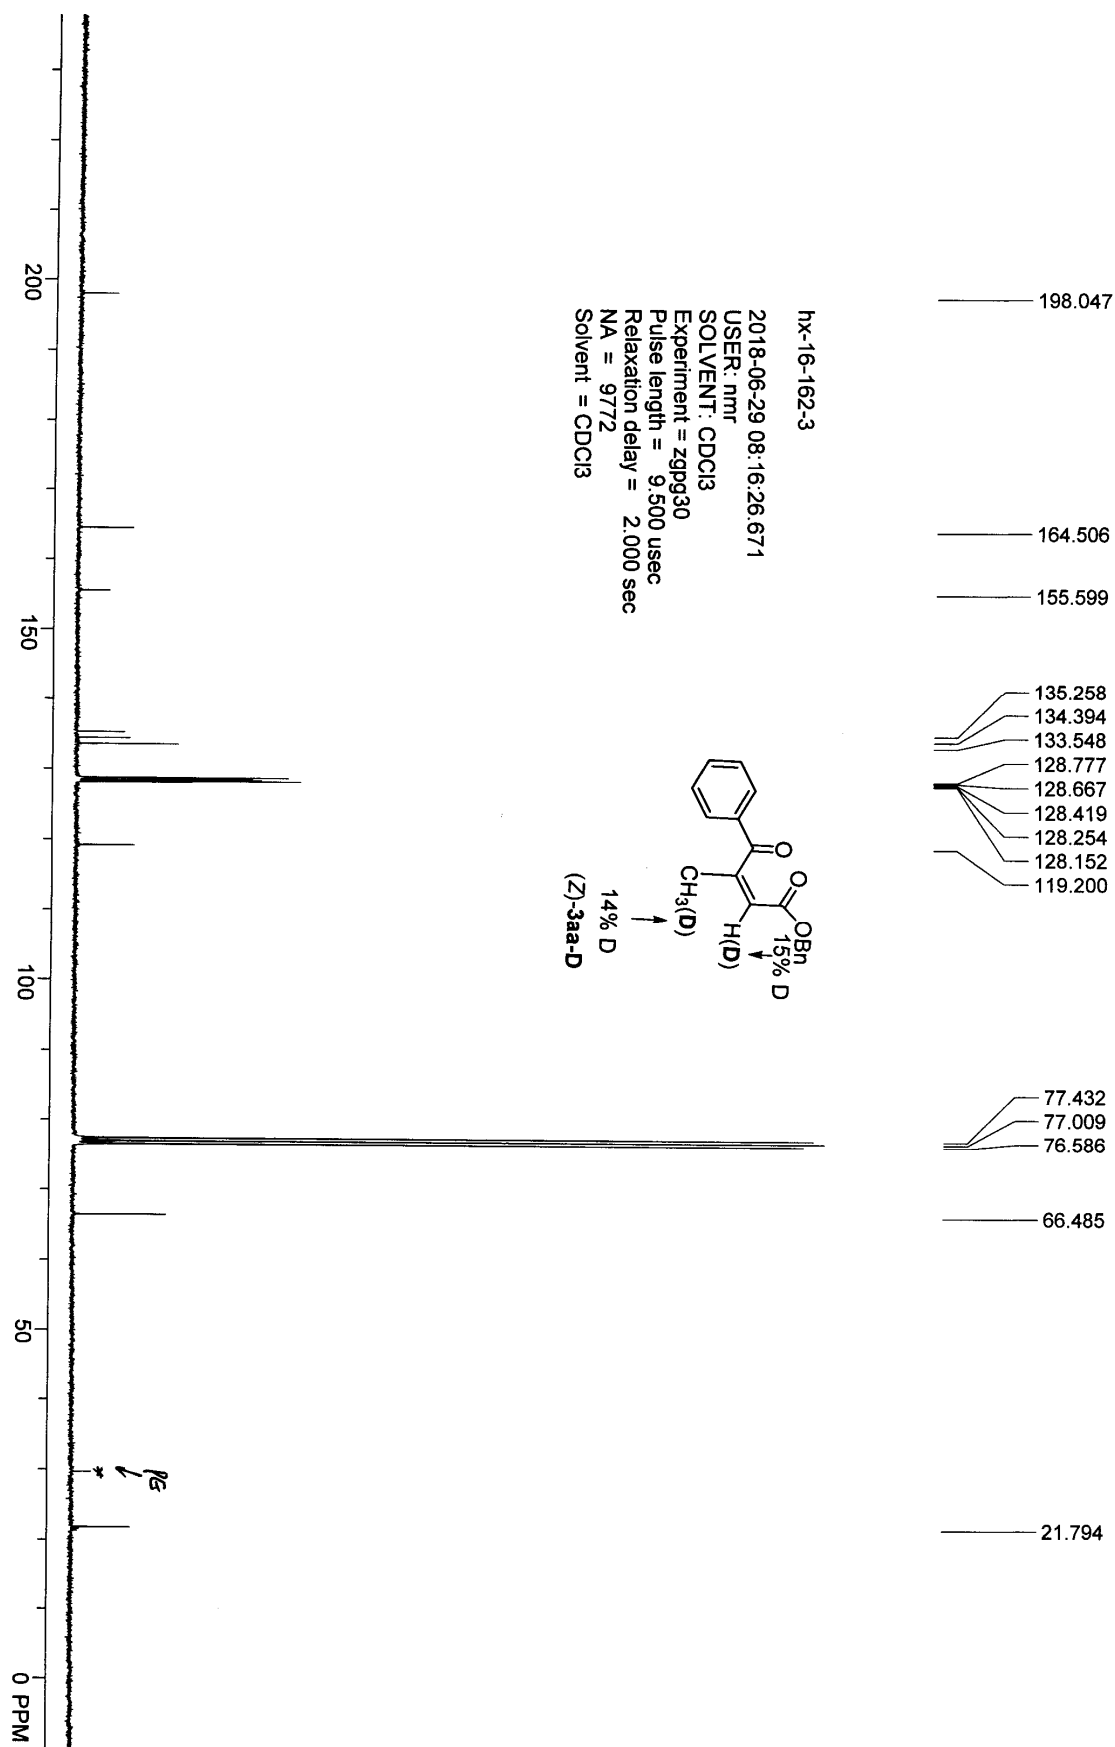

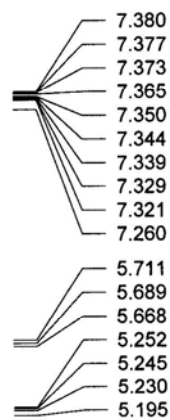

0.000

hx-16-144-1

2018-06-09 13:55:42.203

USER: nmr

SOLVENT: CDCl<sub>3</sub>

Experiment = zg30

Pulse length = 14.000 usec

Relaxation delay = 1.000 sec

NA = 8

Solvent = CDCl<sub>3</sub>

PTSD = 32768

F1 = 300.130005 MHz

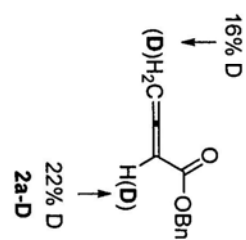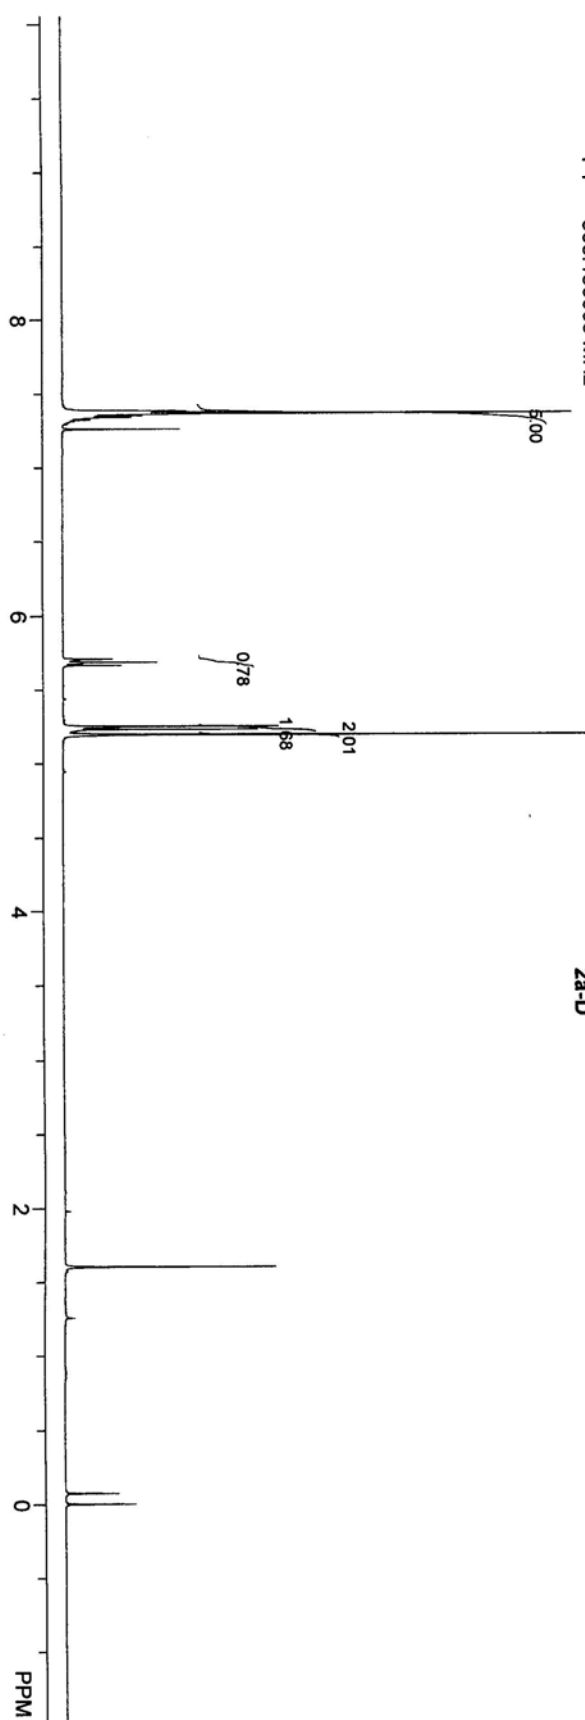

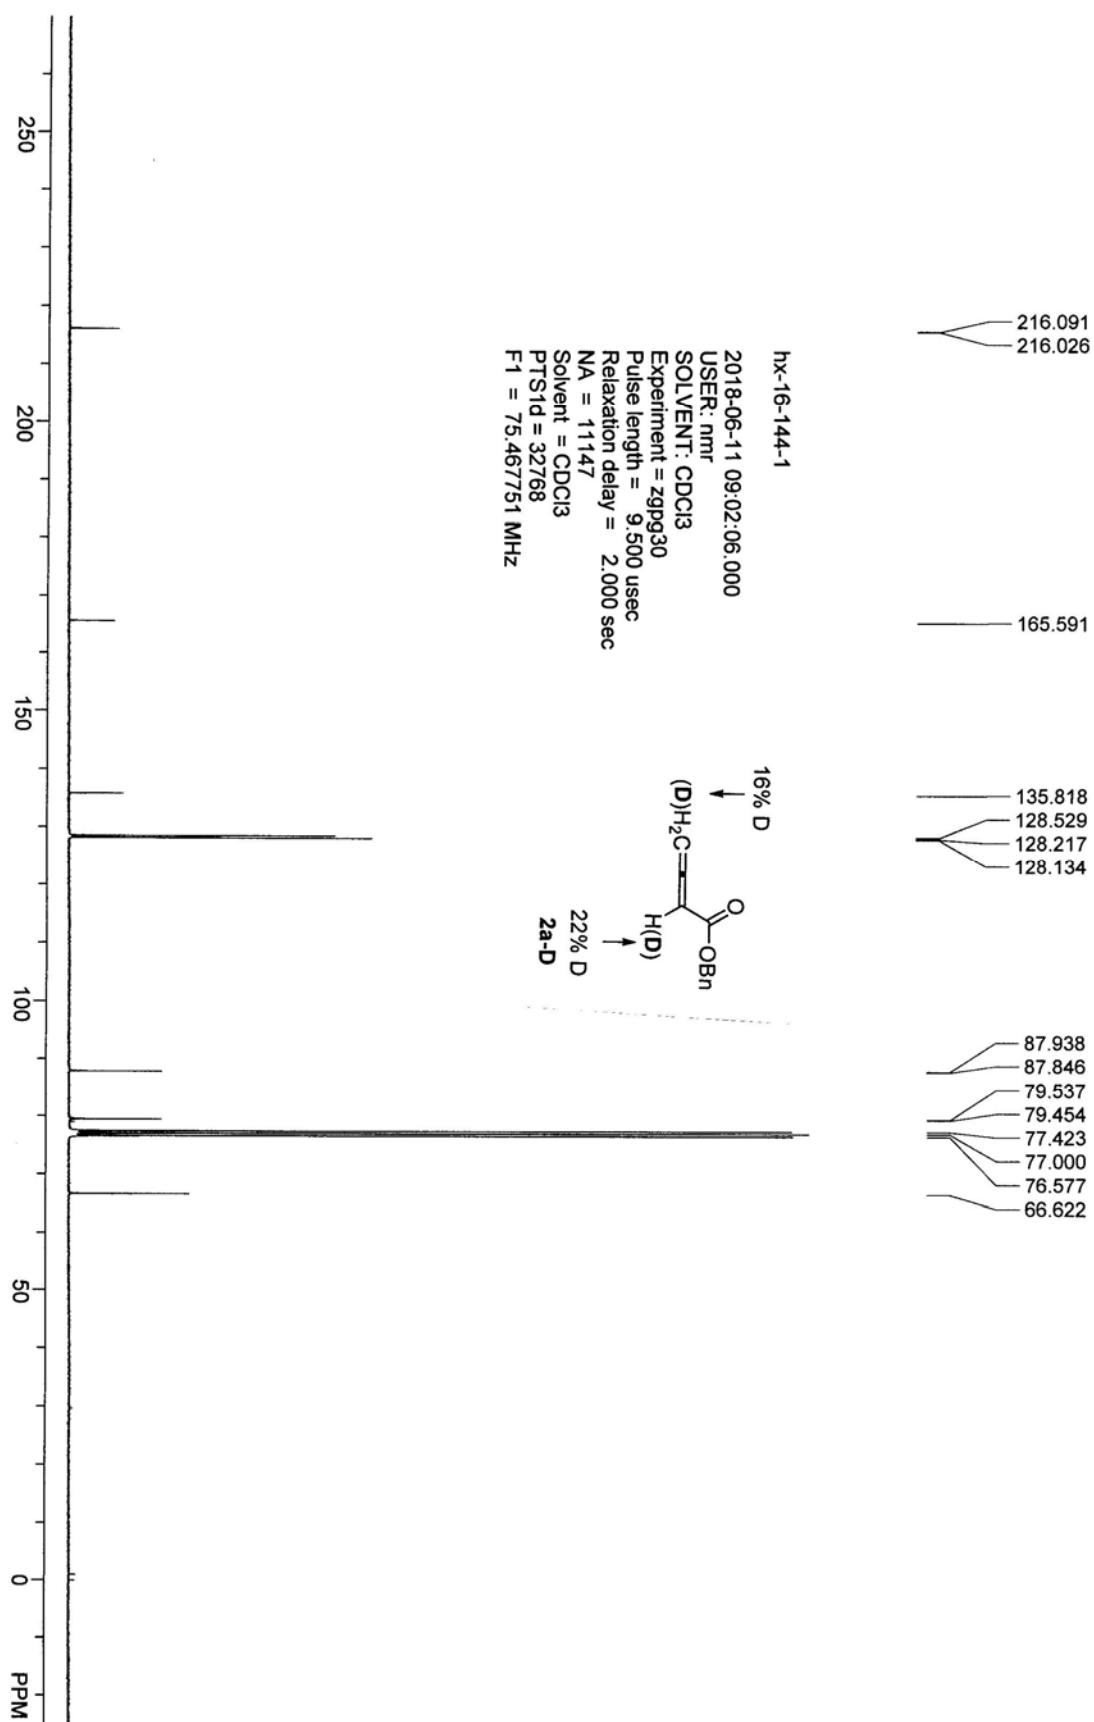

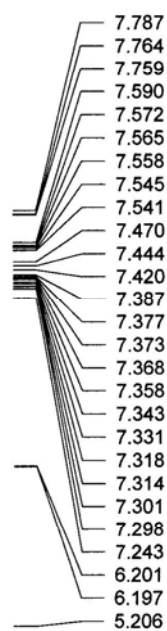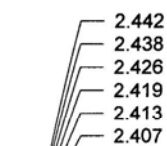

0.000

hx-16-144-2

2018-06-09 13:59:47.828

USER: nmr

SOLVENT: CDCl<sub>3</sub>

Experiment = zg30

Pulse length = 14.000 usec

Relaxation delay = 1.000 sec

NA = 8

Solvent = CDCl<sub>3</sub>

PTStd = 32768

F1 = 300.130005 MHz

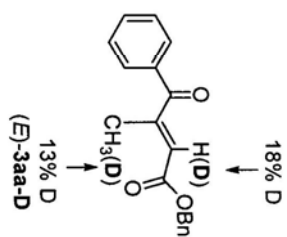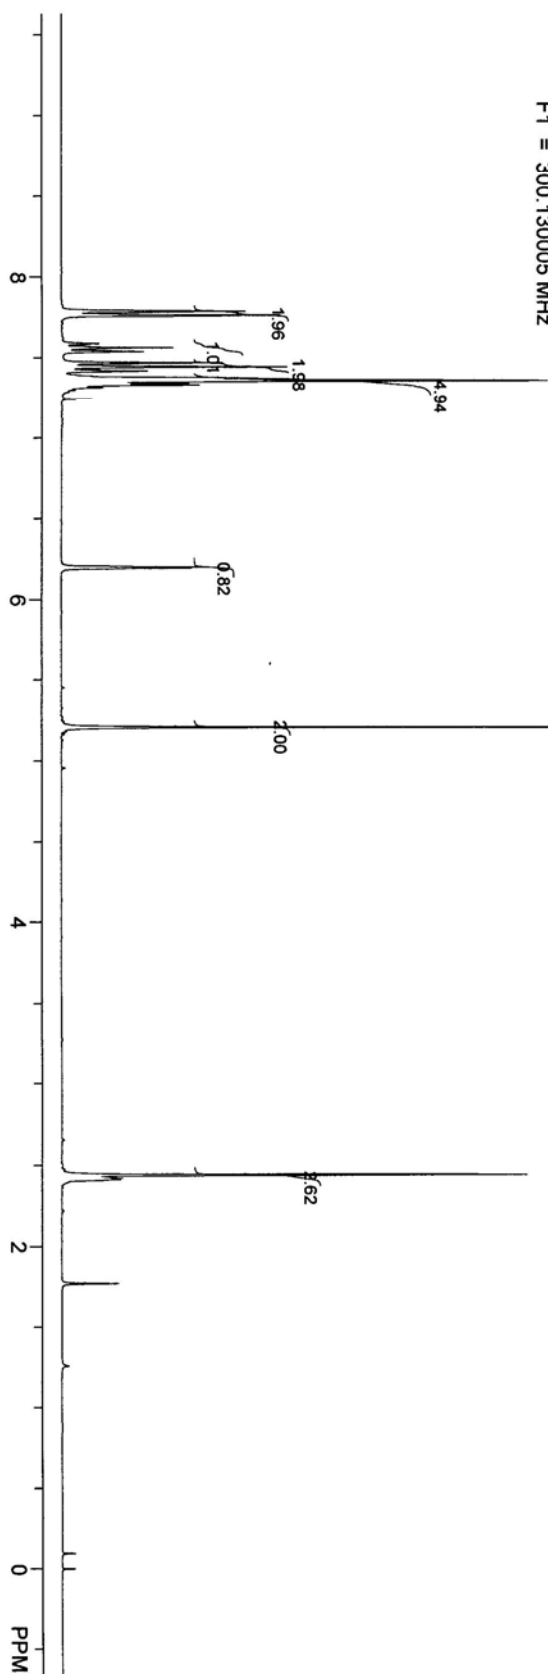



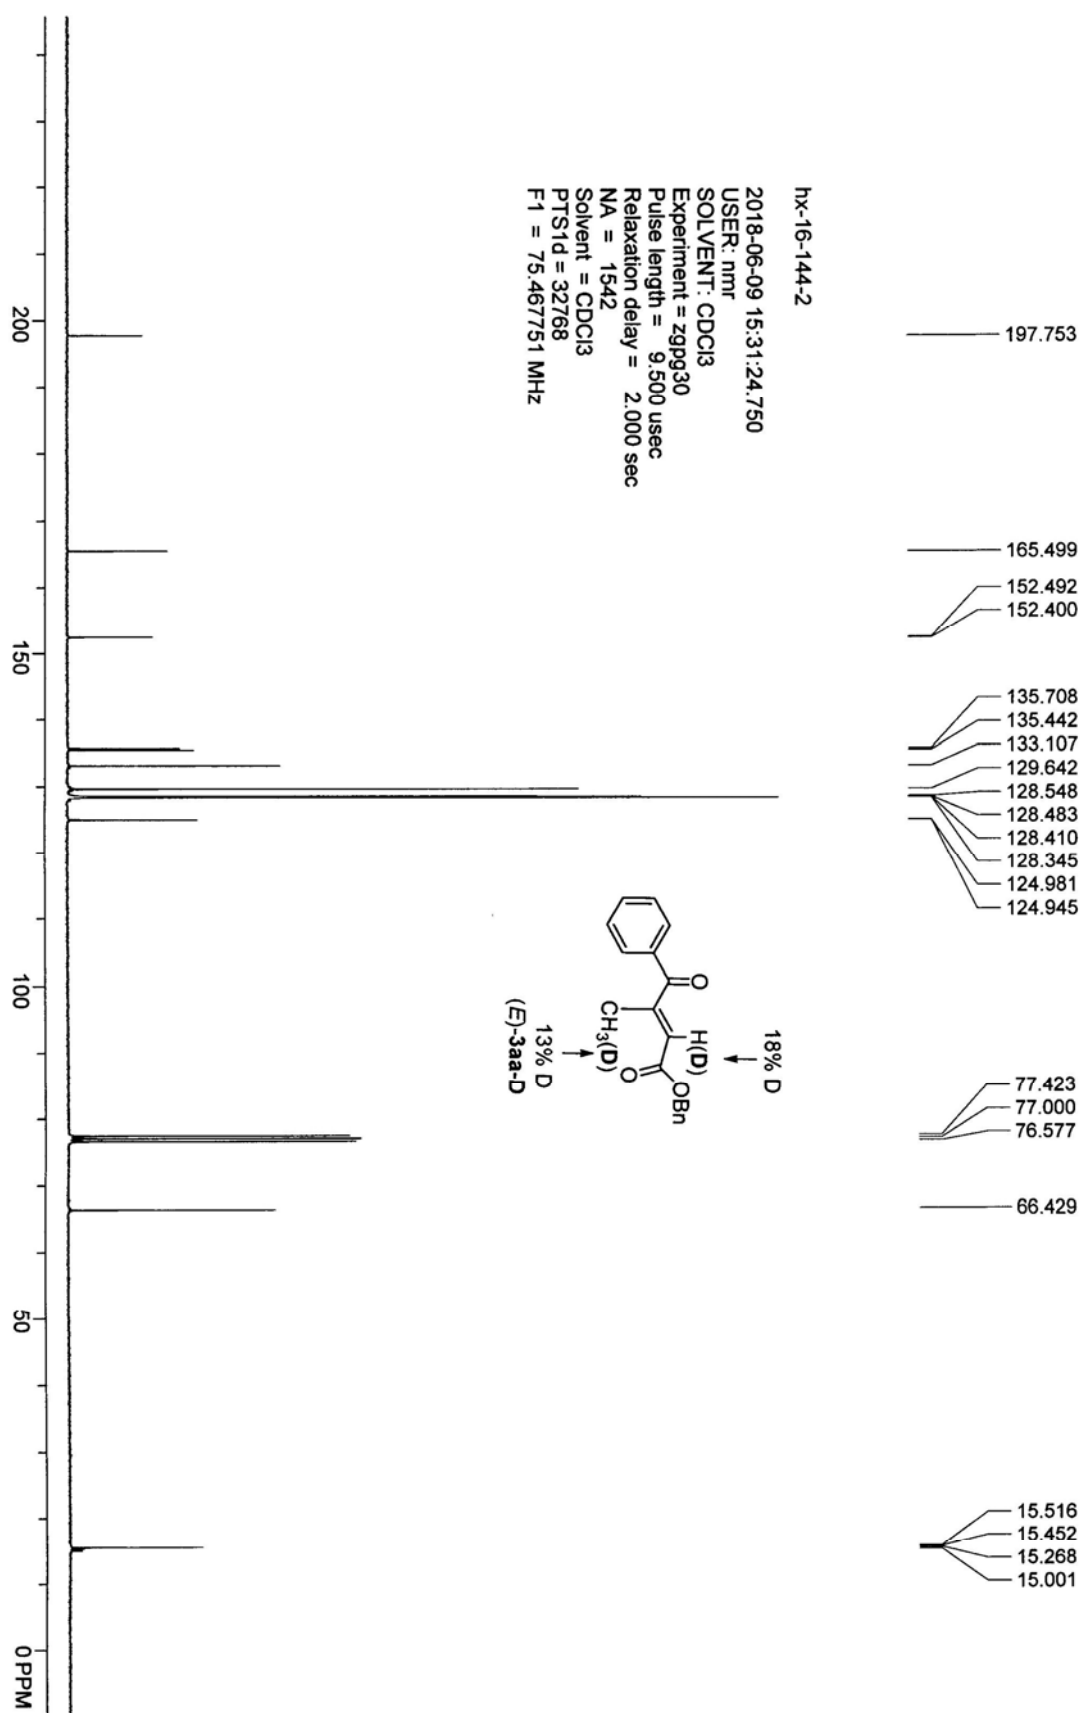

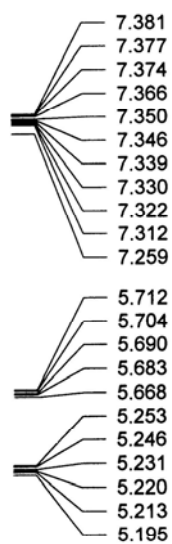

0.000

hx-16-145-1

2018-06-09 17:04:40.156

USER: nmr

SOLVENT: CDCl<sub>3</sub>

Experiment = zg30

Pulse length = 14.000 usec

Relaxation delay = 1.000 sec

NA = 8

Solvent = CDCl<sub>3</sub>

PTSD = 32768

F1 = 300.130005 MHz

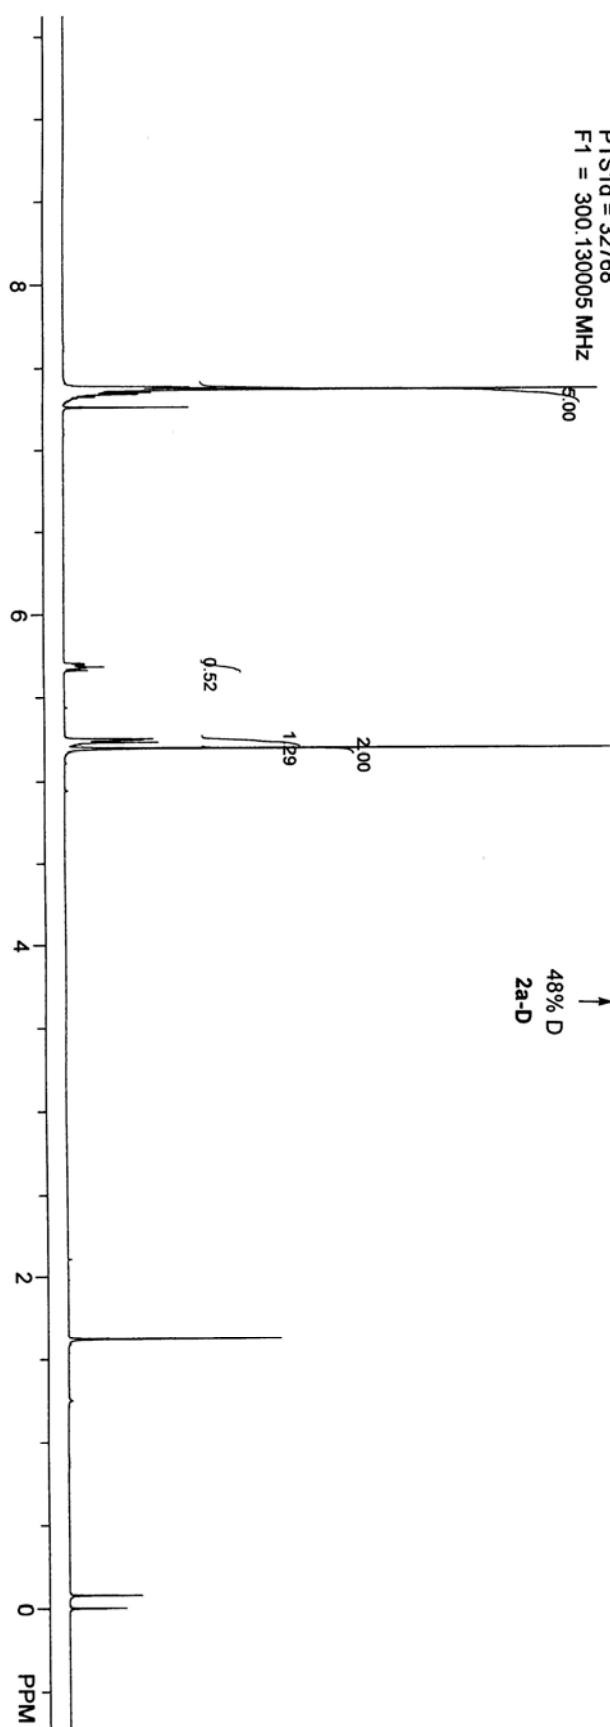

216.146  
216.081  
216.017

———— 165.582



|         |
|---------|
| 128.529 |
| 128.217 |
| 135.809 |
| 128.125 |

2018-06-10 08:58:54.031

**SOLVENT:** CDCl<sub>3</sub>

Pulse length = 9.50  
Experiment = zgpg30

Relaxation delay = 2.000 sec

NA = 11758  
colcount = 67

Solvent = CDCl<sub>3</sub>  
PTS1d = 32768

F1 = 75.467751 MHz

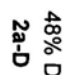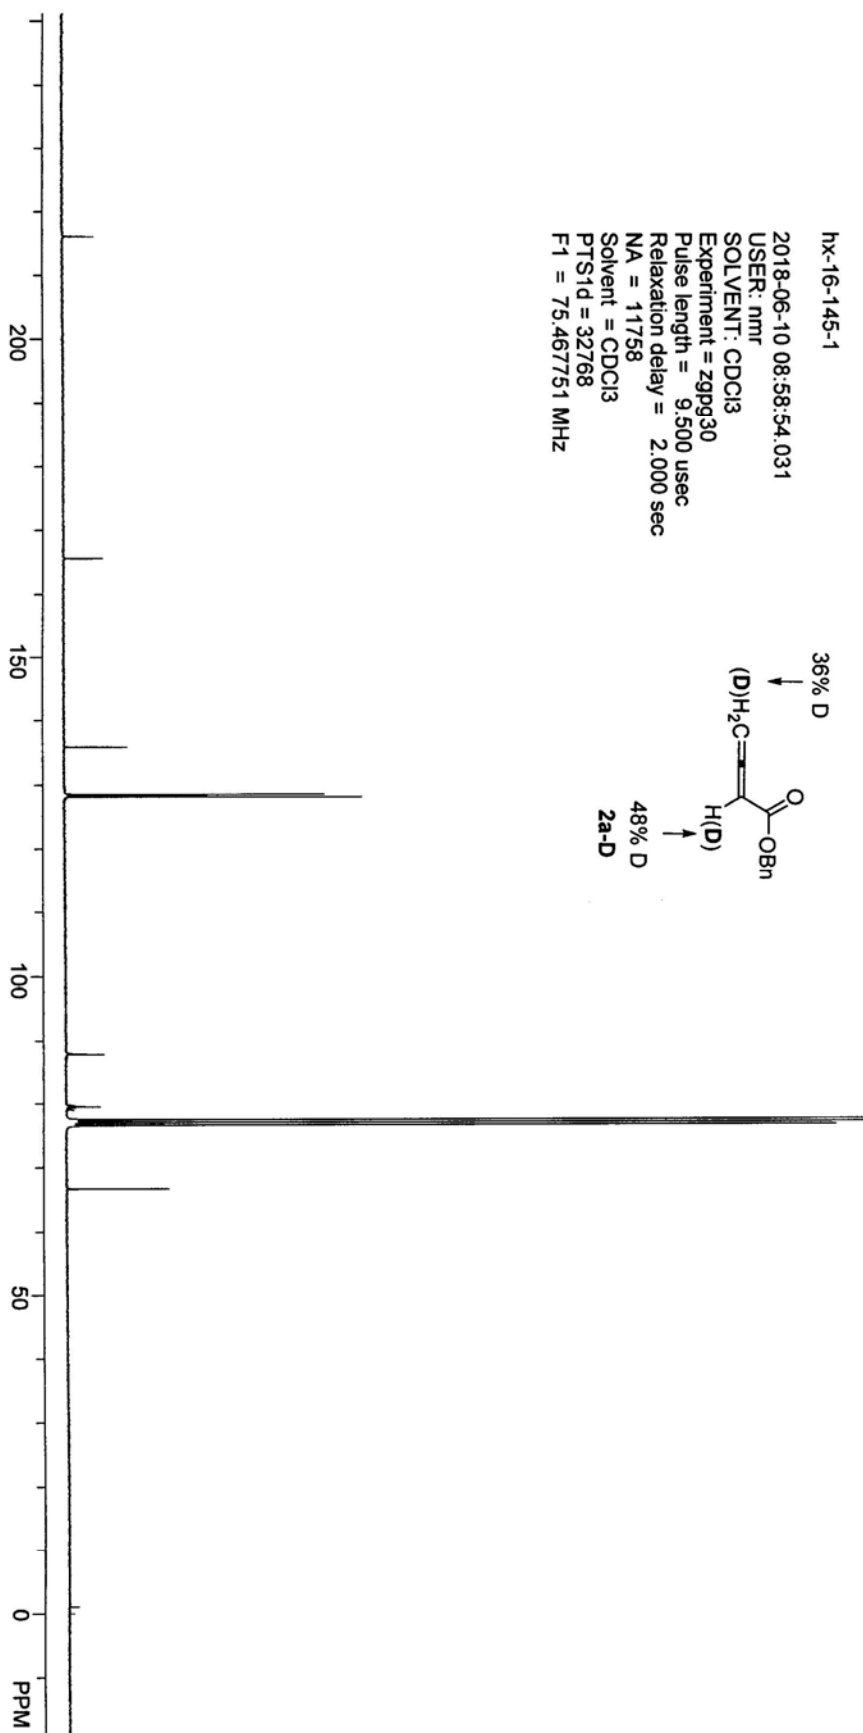

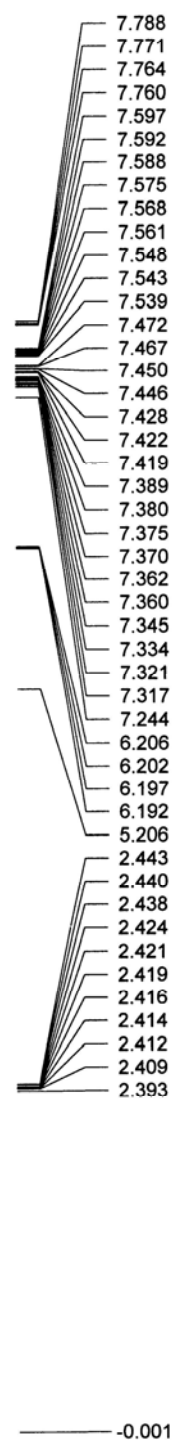

hx-16-145-2

2018-06-09 17:09:03.906

USER: nmr

SOLVENT: CDCl<sub>3</sub>

Experiment = zg30

Pulse length = 14.000 usec

Relaxation delay = 1.000 sec

NA = 8

Solvent = CDCl<sub>3</sub>

PTStd = 32768

F1 = 300.130005 MHz

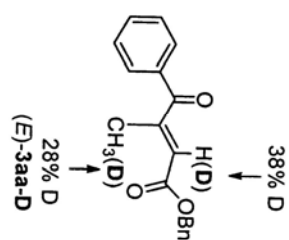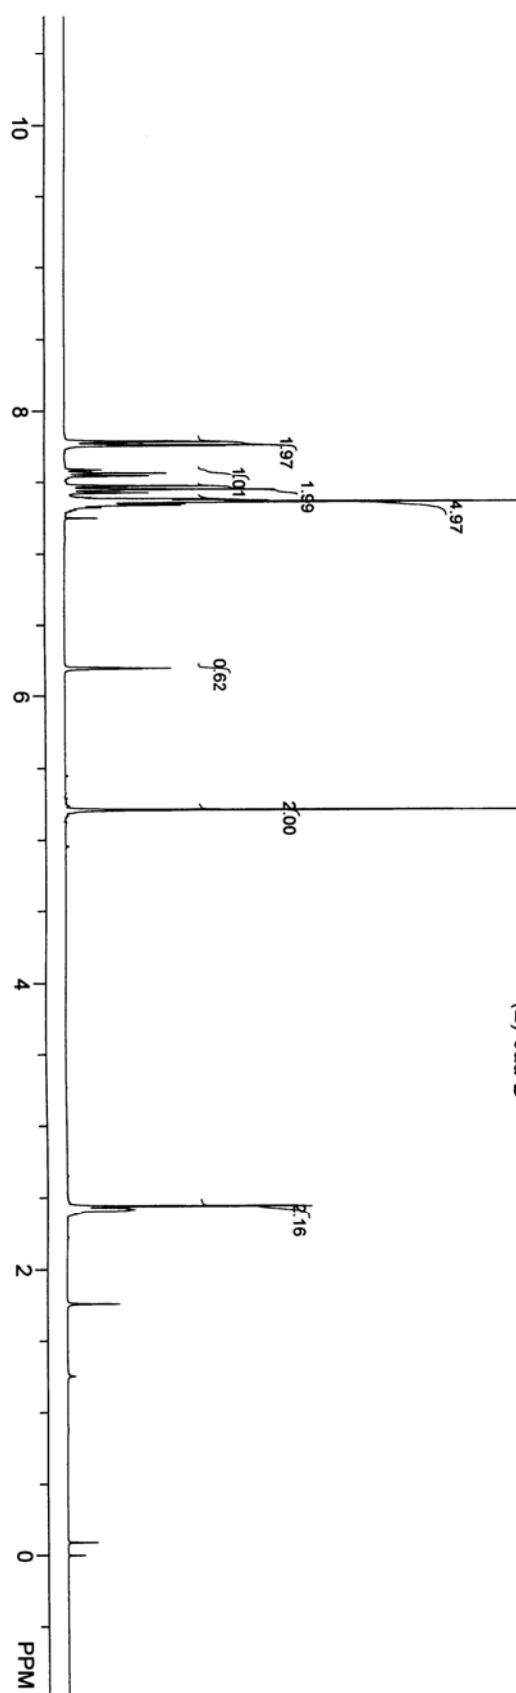

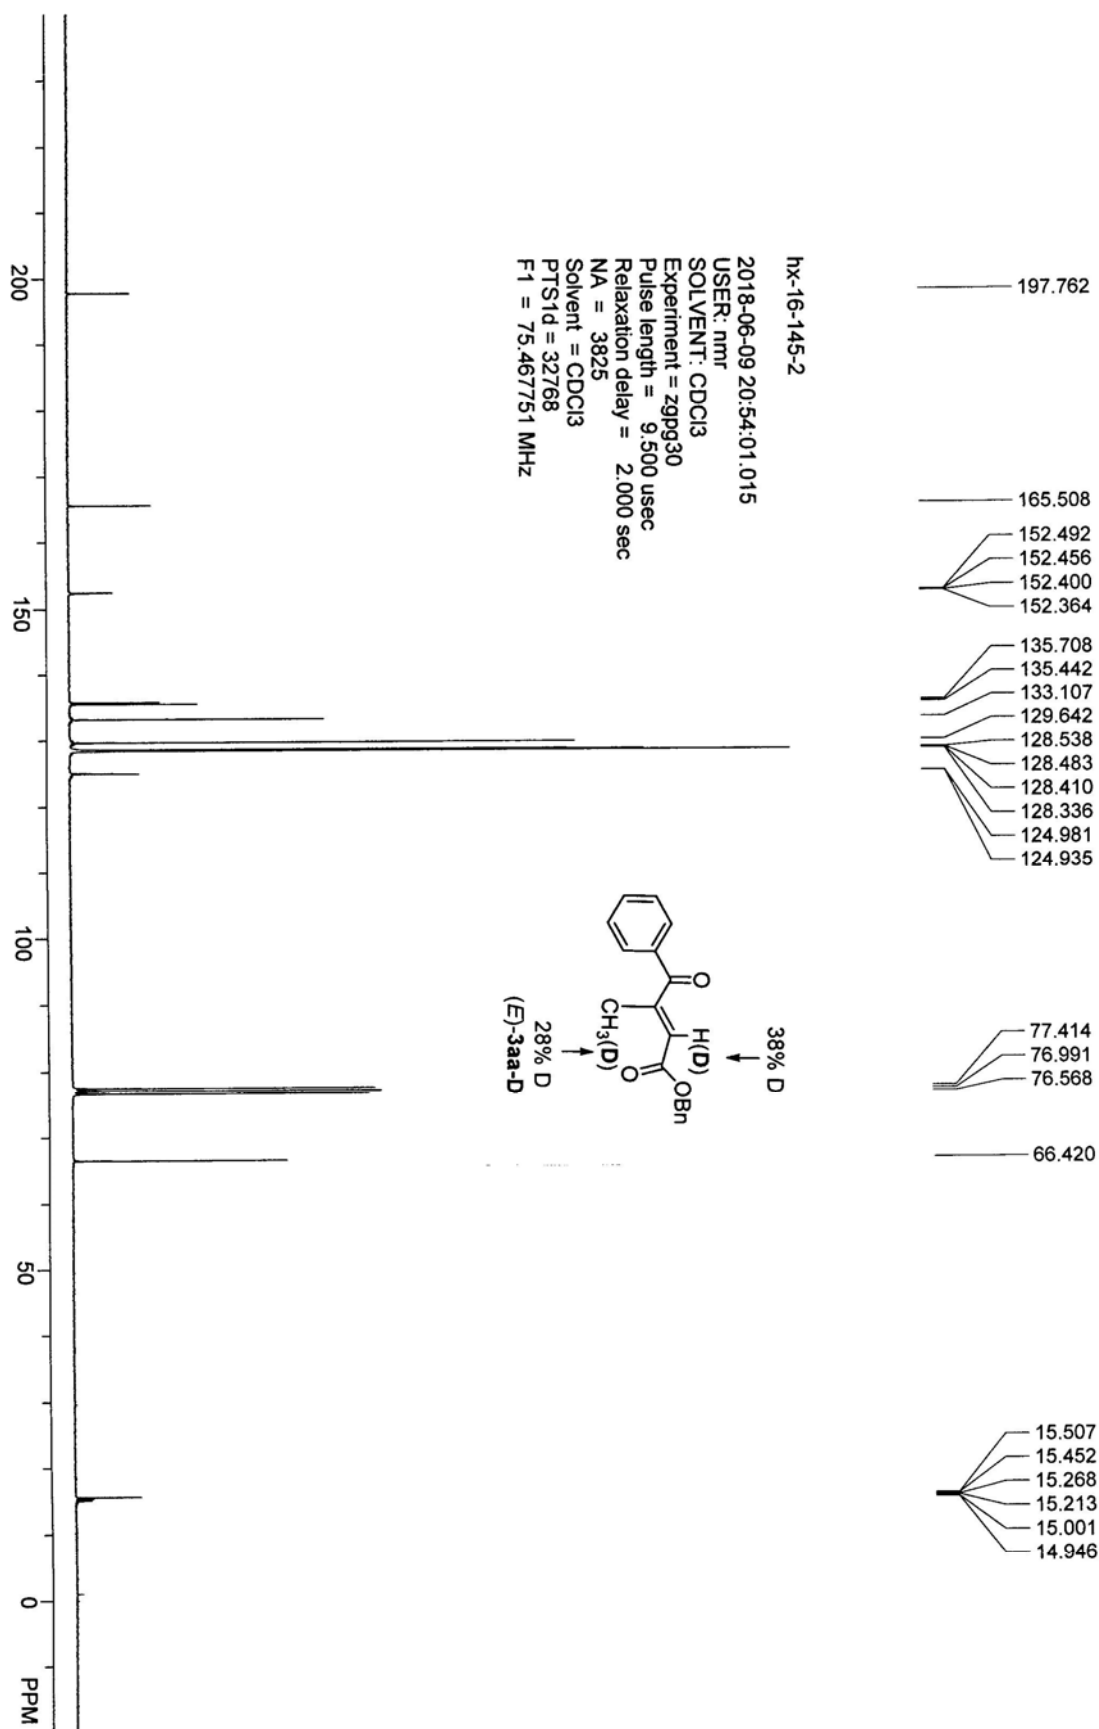

7.383  
7.380  
7.376  
7.369  
7.353  
7.263

5.706  
5.698  
5.684  
5.257  
5.249  
5.234  
5.197

1.588

0.000

spec, CDCl<sub>3</sub>,  
Thu May 04 03:52:25 2017  
USER: nmr  
SOLVENT:  
Experiment = zg30  
Pulse length = 14.000 usec  
Recycle delay = 1.000 sec  
NA = 8  
PTStd = 32768  
F1 = 300.131866 MHz  
F2 = 1.000000 MHz  
SW1 = 6188.12 Hz

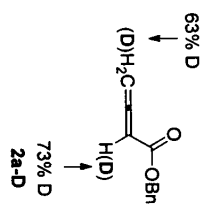

mdk-11-089-2

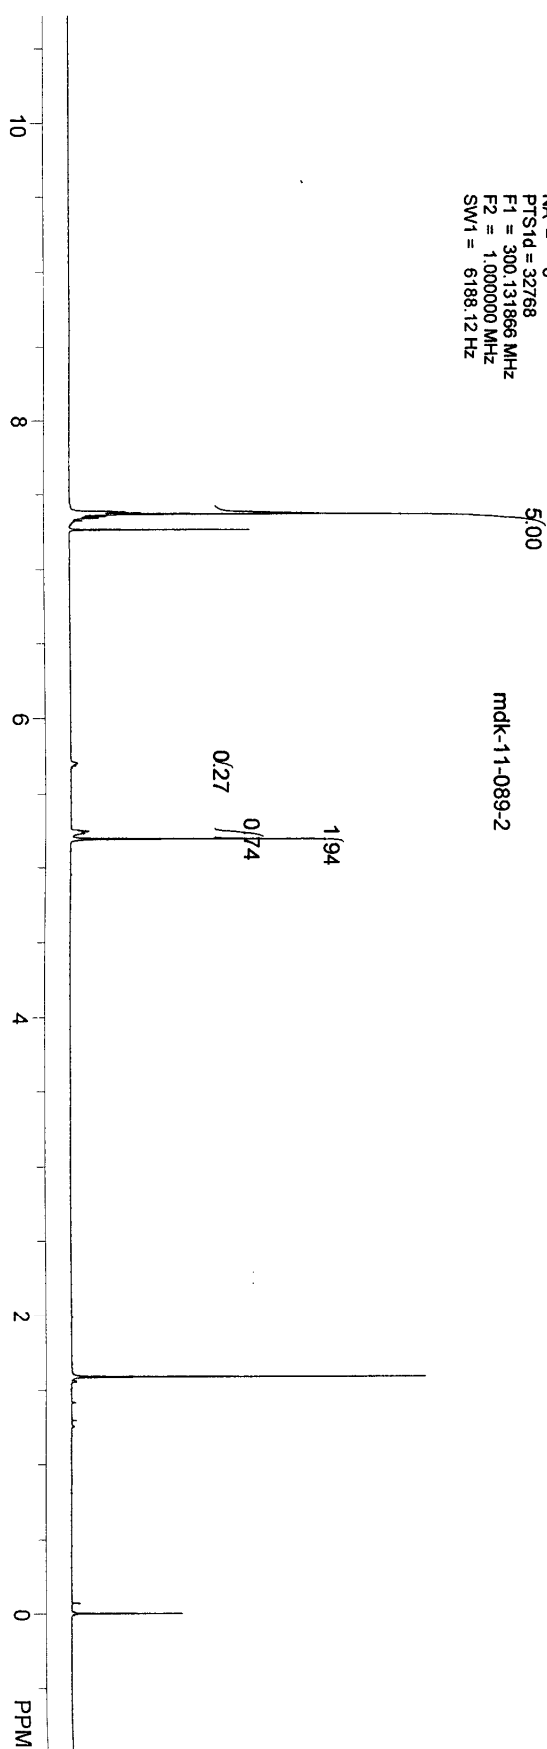

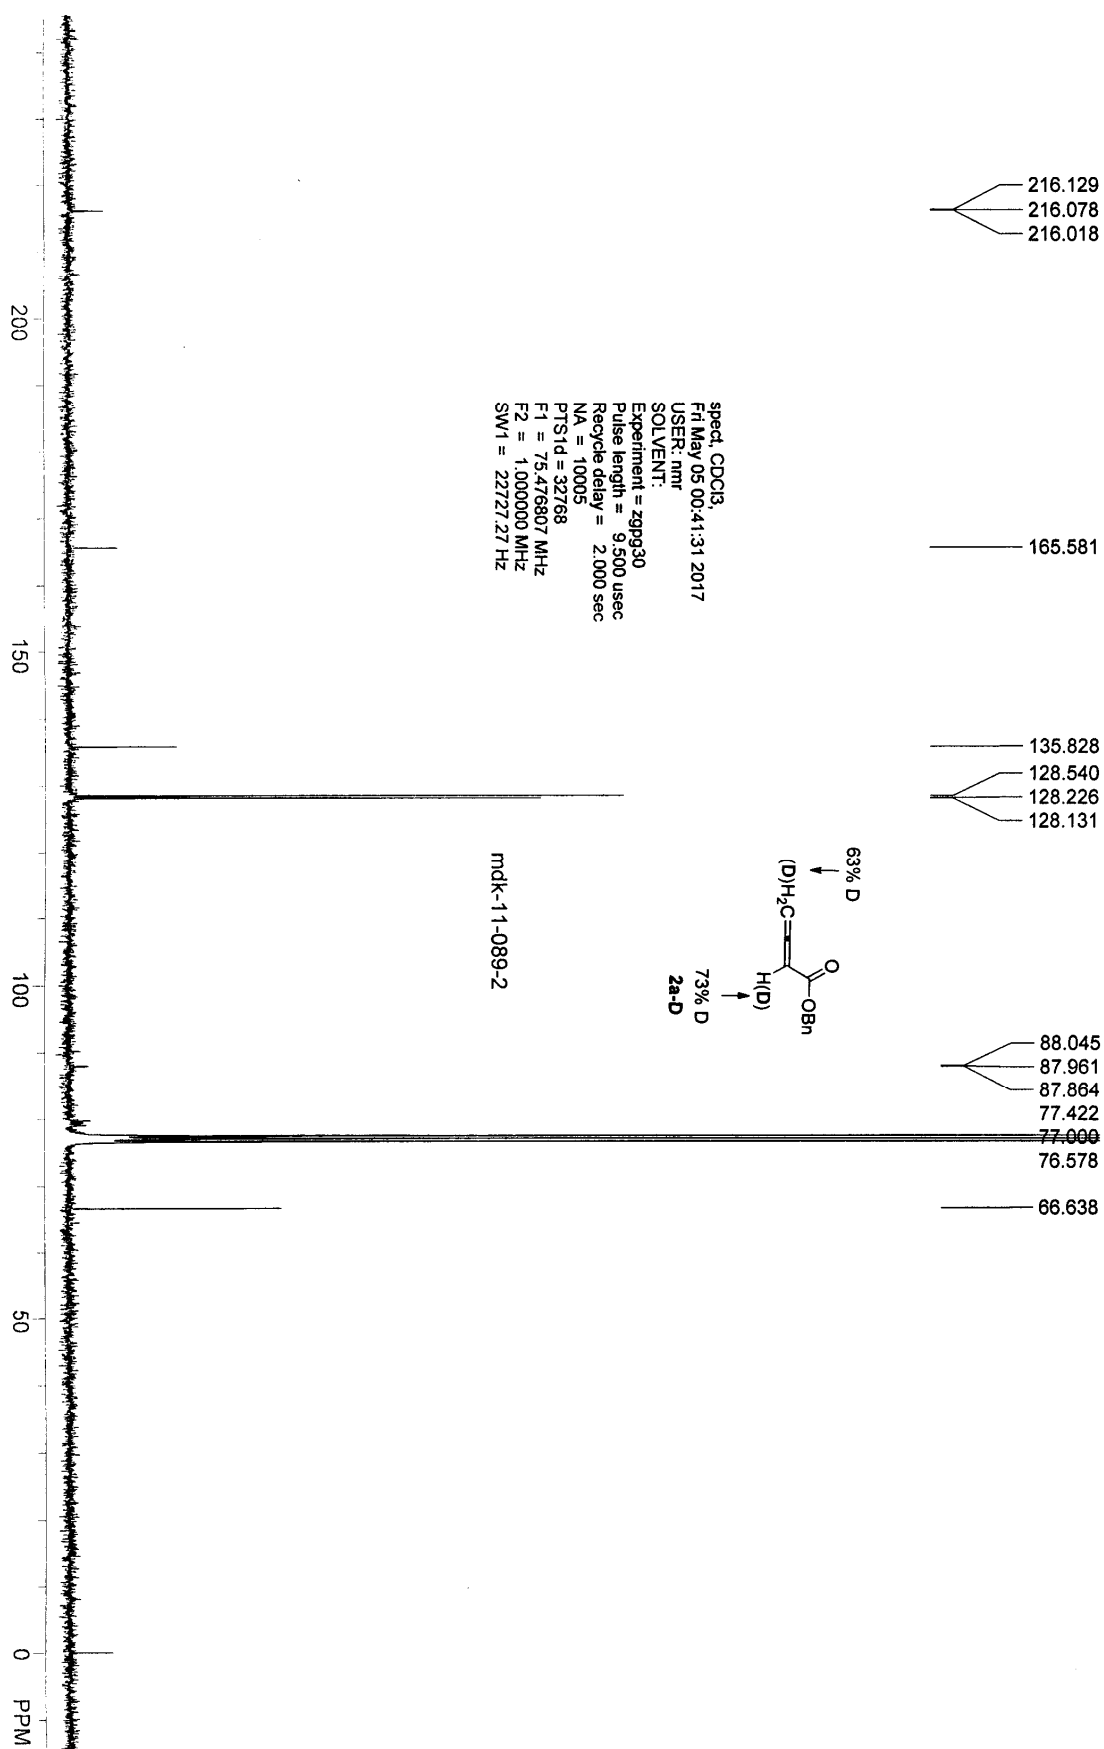

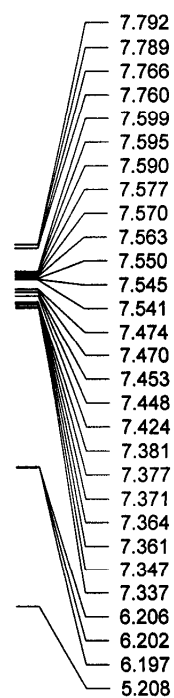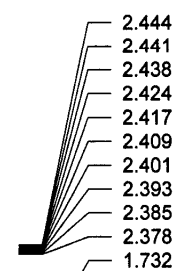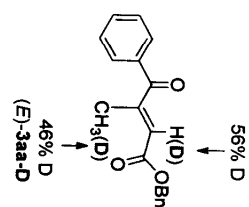

spect, CDCl<sub>3</sub>,  
Thu May 04 04:32:30 2017  
USER: nmf  
SOLVENT:  
Experiment = zg30  
Pulse length = 14.000 usec  
Recycle delay = 1.000 sec  
NA = 8  
PTS1d = 32768  
F1 = 300.131866 MHz  
F2 = 1.000000 MHz  
SWH = 6188.12 Hz

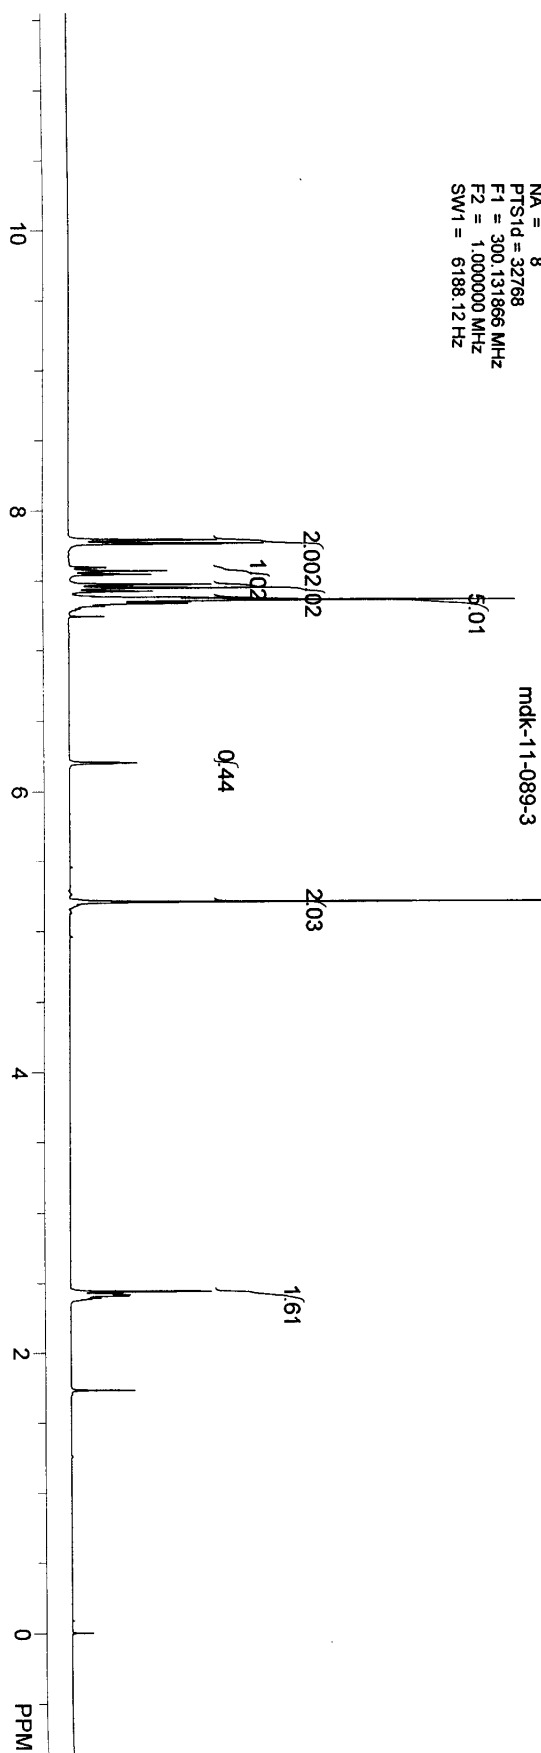



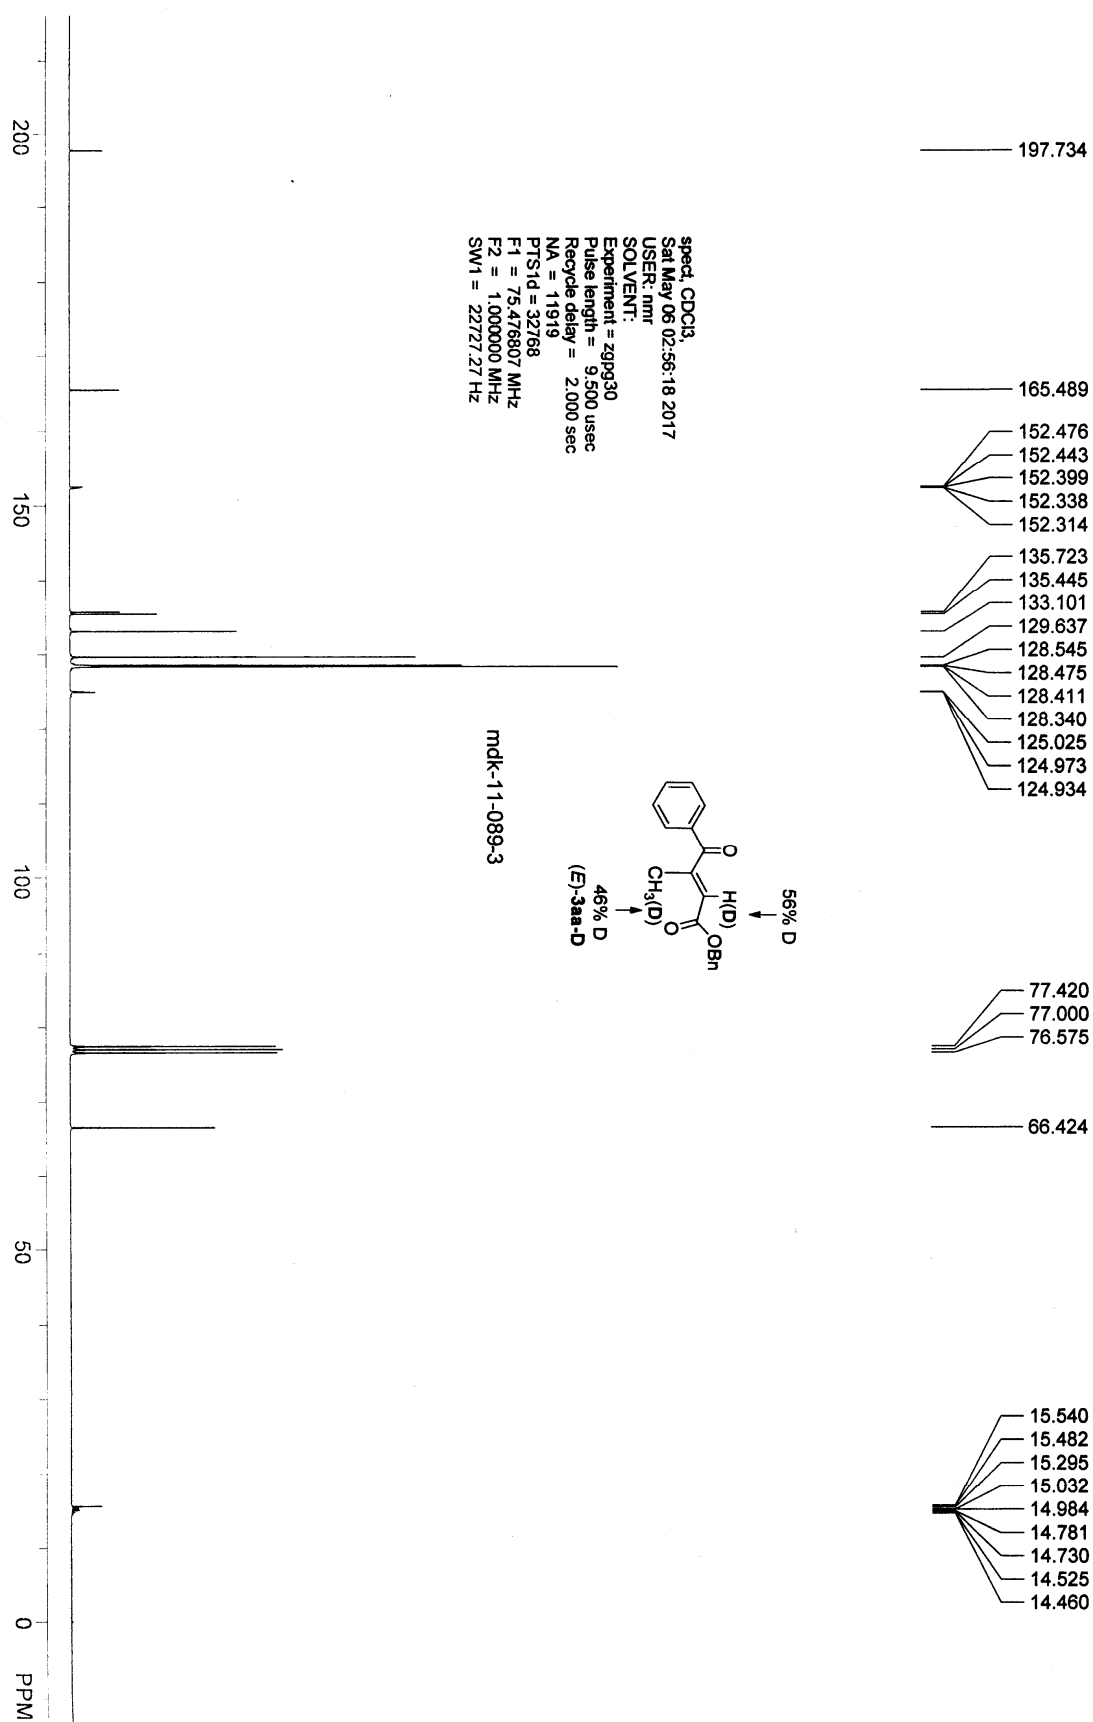

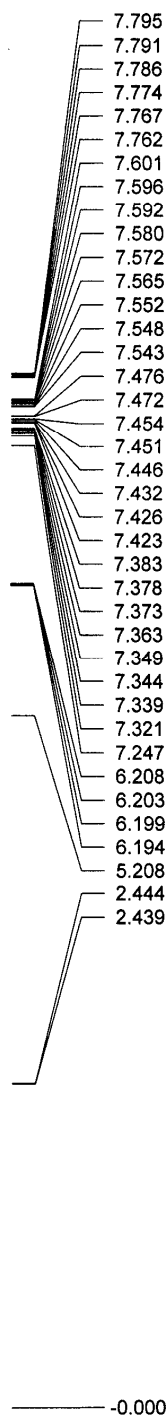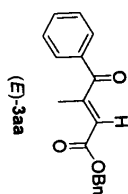

spec1, CDCl3,  
 Fri Dec 23 05:20:29 2016  
 USER: nmf  
 SOLVENT:  
 Experiment = zg30  
 Pulse length = 14.000 usec  
 Recycle delay = 1.000 sec  
 NA = 8  
 PTD1D = 32768  
 F1 = 300.131866 MHz  
 F2 = 1.000000 MHz  
 SW1 = 6188.12 Hz

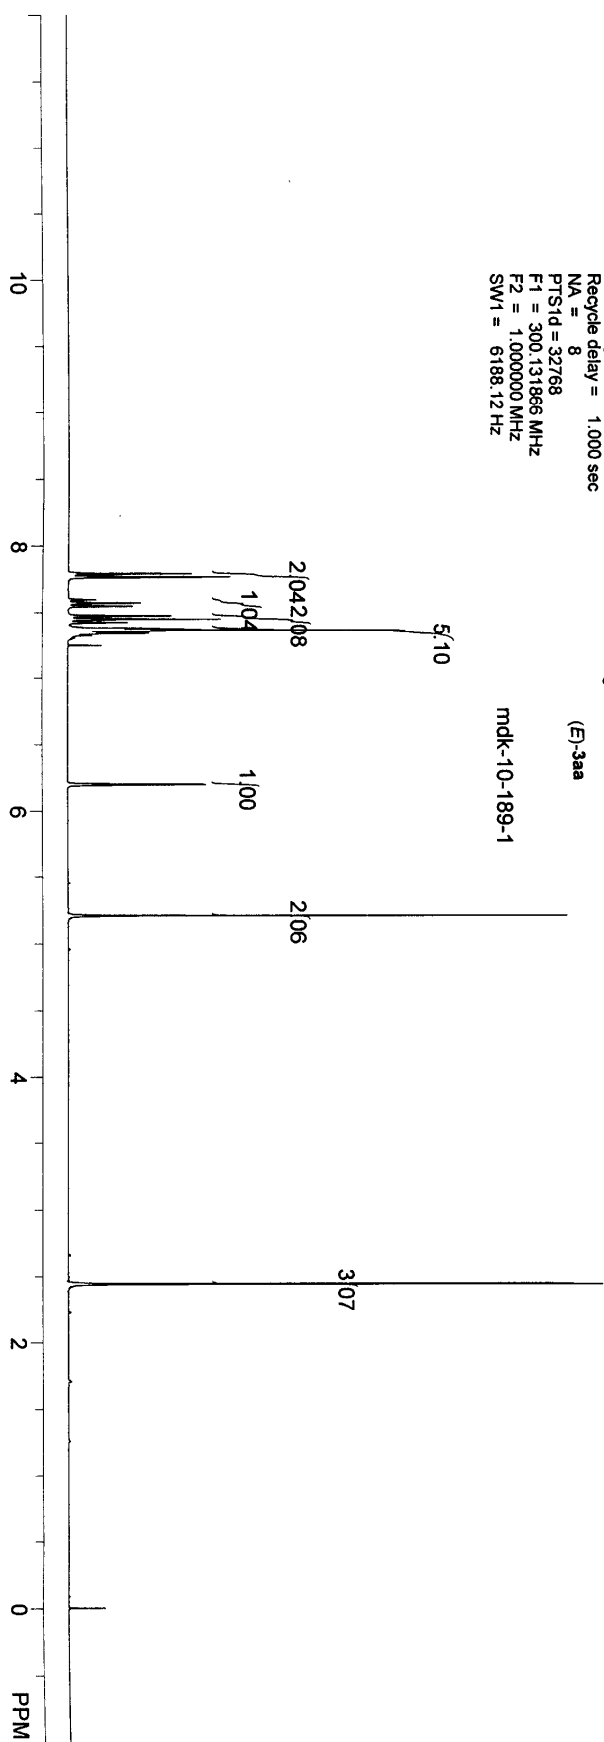

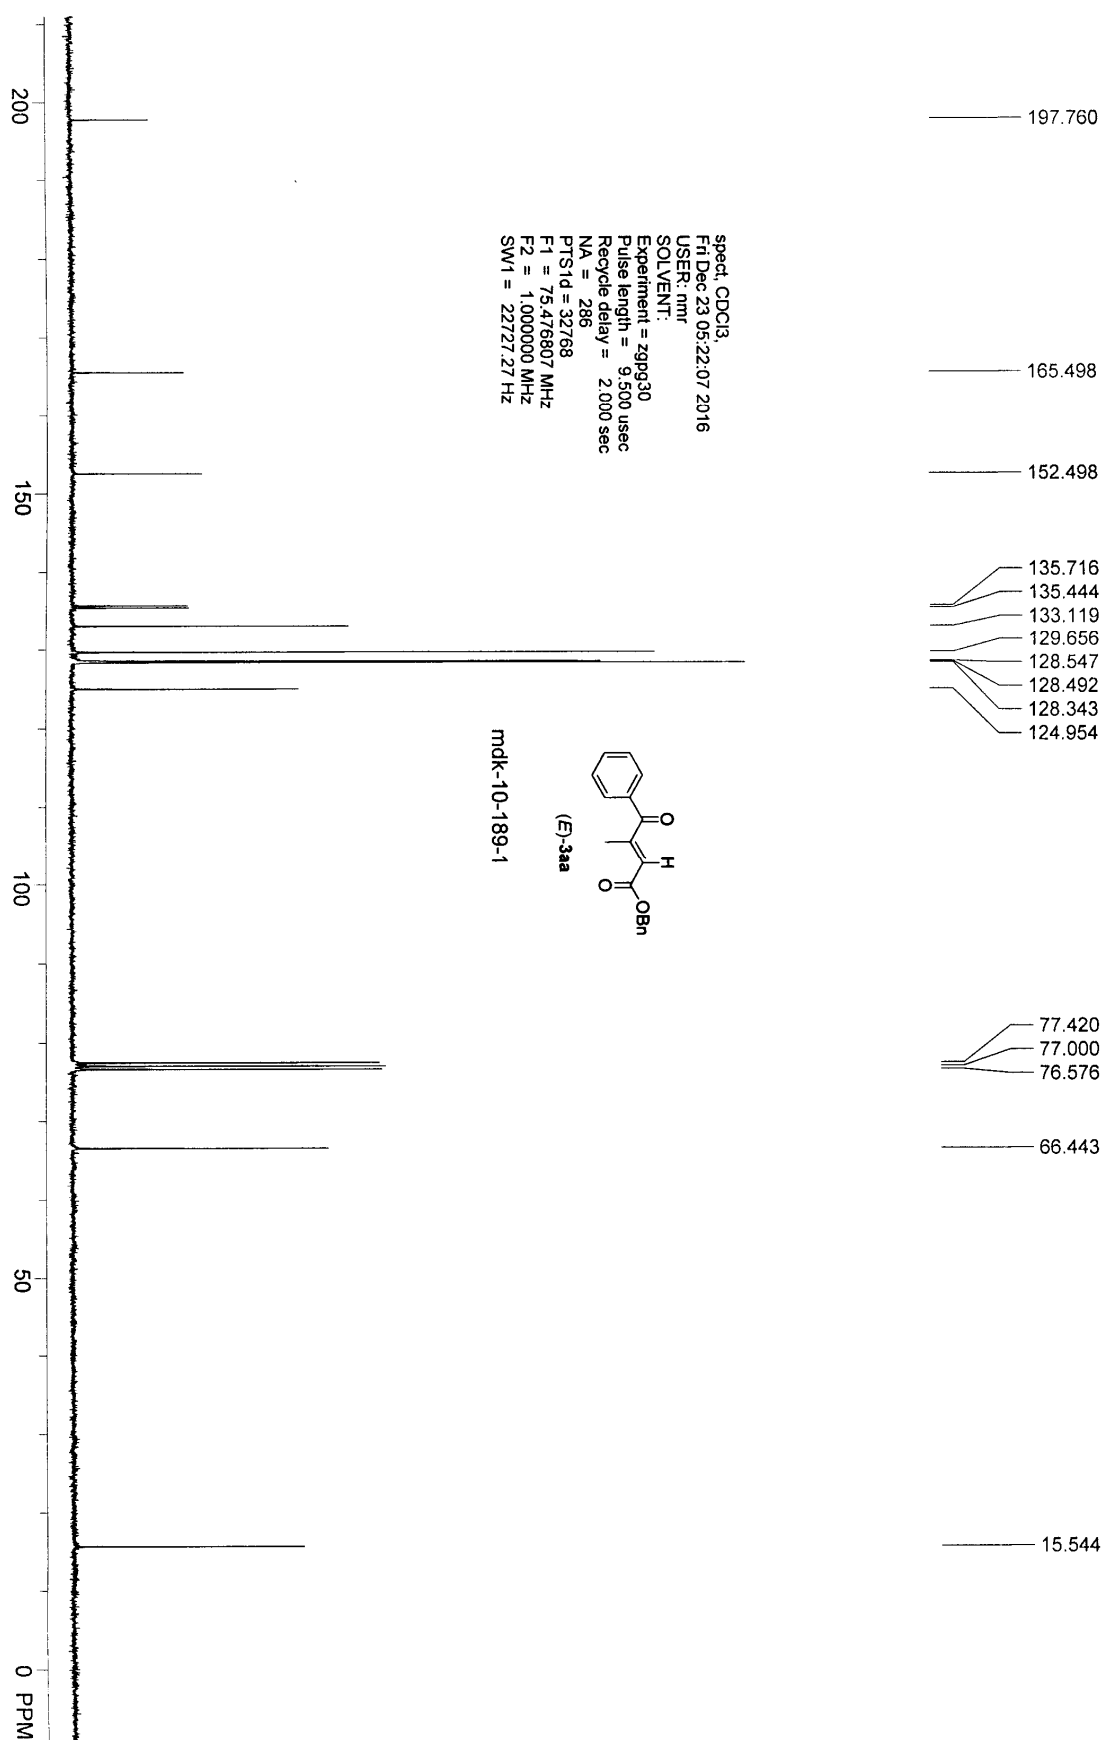

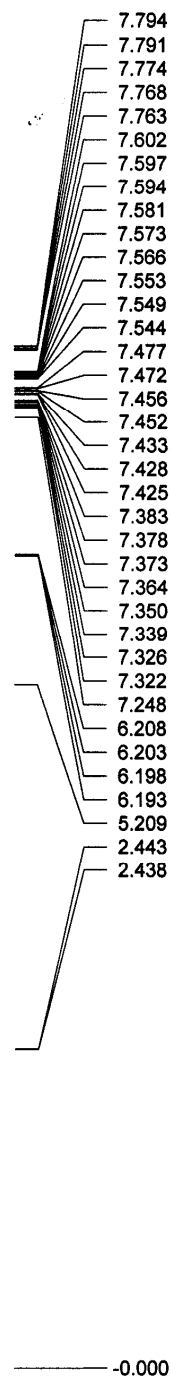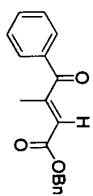

spec1, CDCl<sub>3</sub>,  
 Fri Apr 28 06:40:44 2017  
 USER: nmf  
 SOLVENT:  
 Experiment = zg30  
 Pulse length = 14,000 usec  
 Recycle delay = 1,000 sec  
 NA = 8  
 P1 = 32768  
 F1 = 300.131866 MHz  
 F2 = 1,000,000 MHz  
 SW1 = 6188.12 Hz

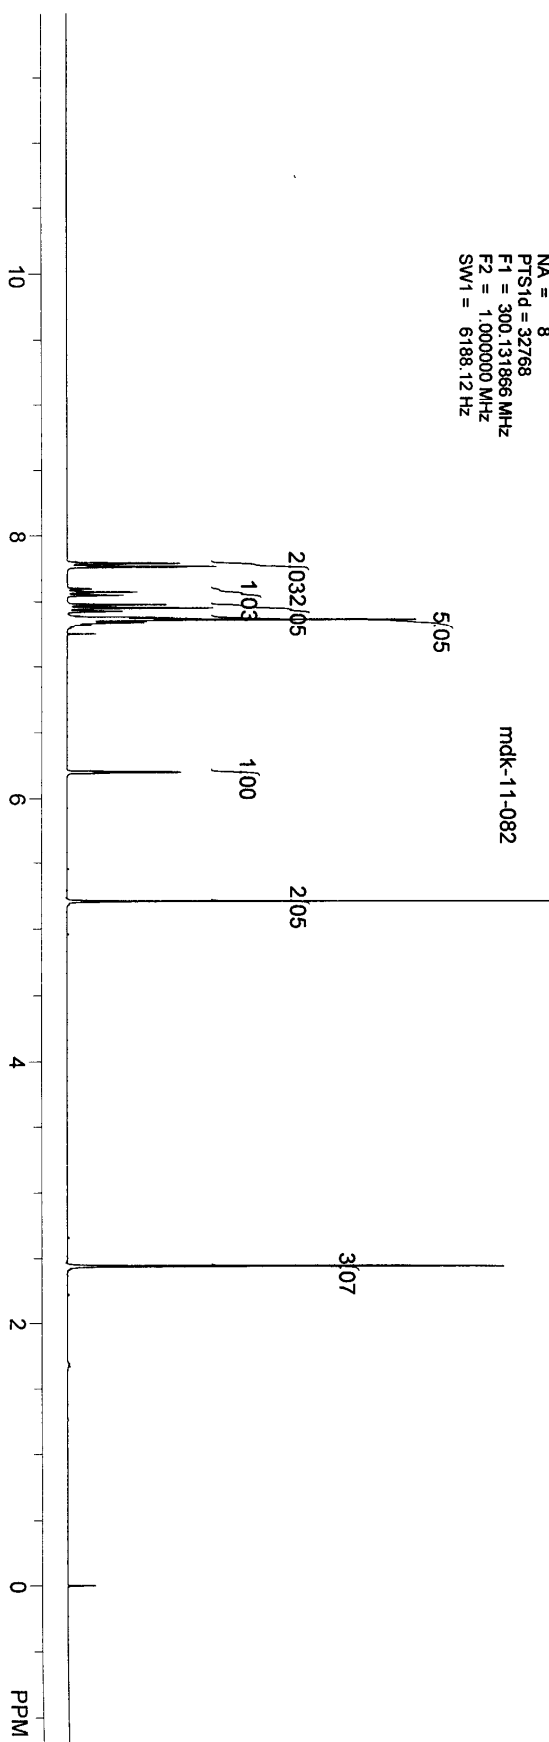

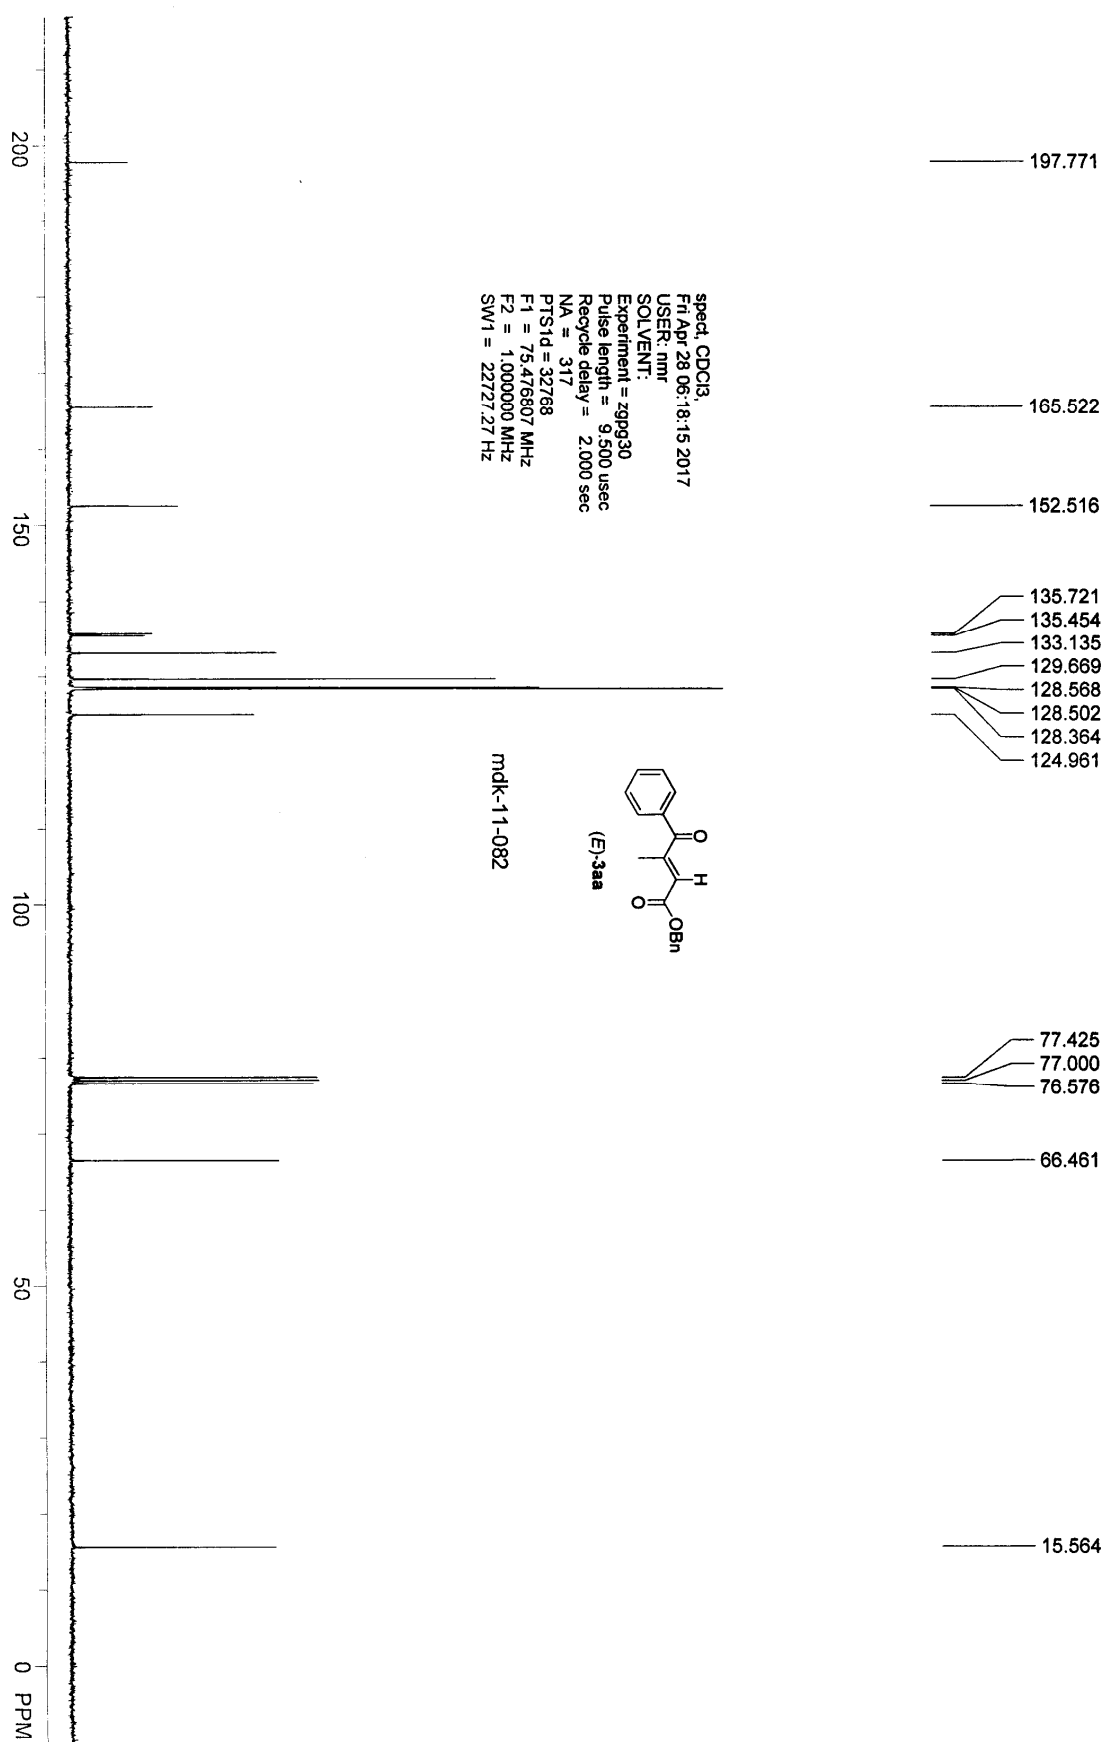

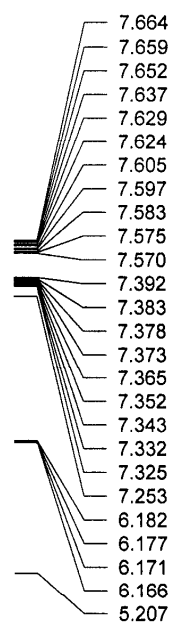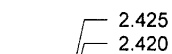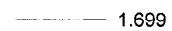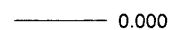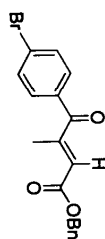

specd, CDCl<sub>3</sub>  
Tue Dec 27 05:19:19 2016  
USER: nmr  
SOLVENT:  
Experiment = zg30  
Pulse length = 14.000 usec  
Recycle delay = 1.000 sec  
NA = 8  
PTSD = 32768  
F1 = 300.131866 MHz  
F2 = 1.000000 MHz  
SW1 = 6188.12 Hz

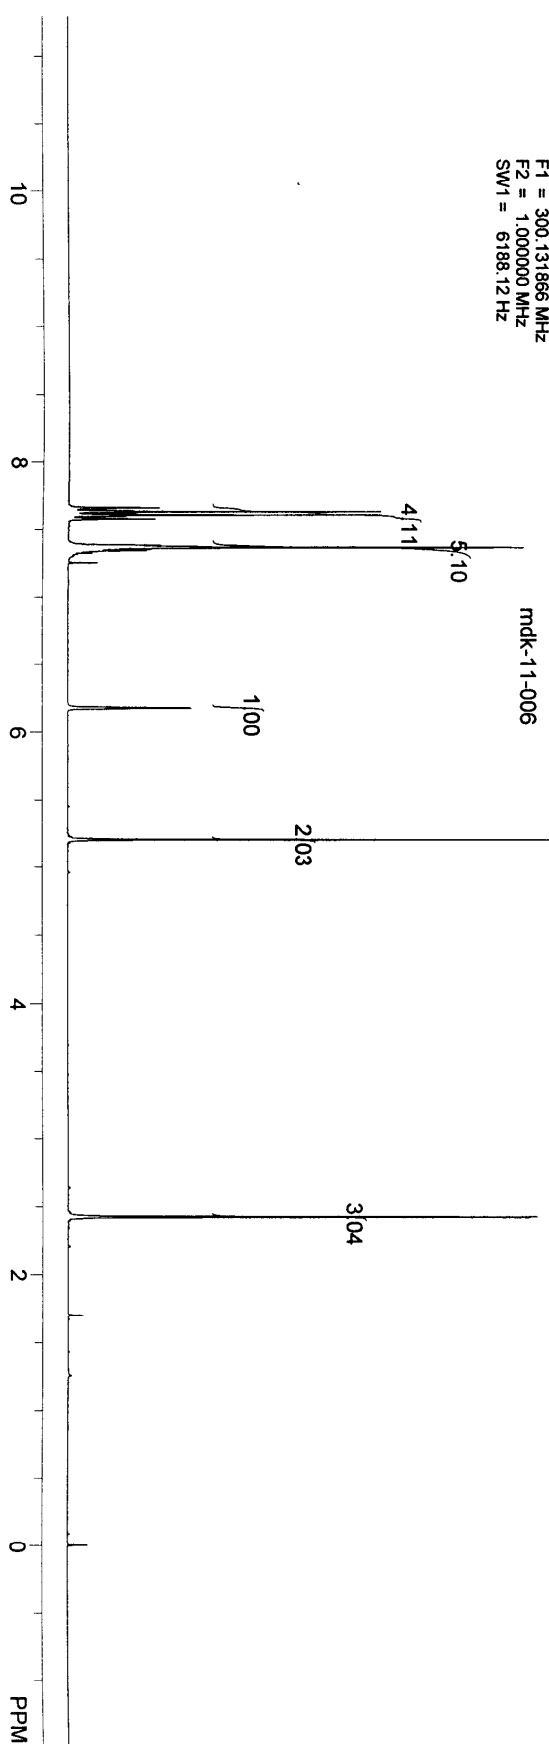

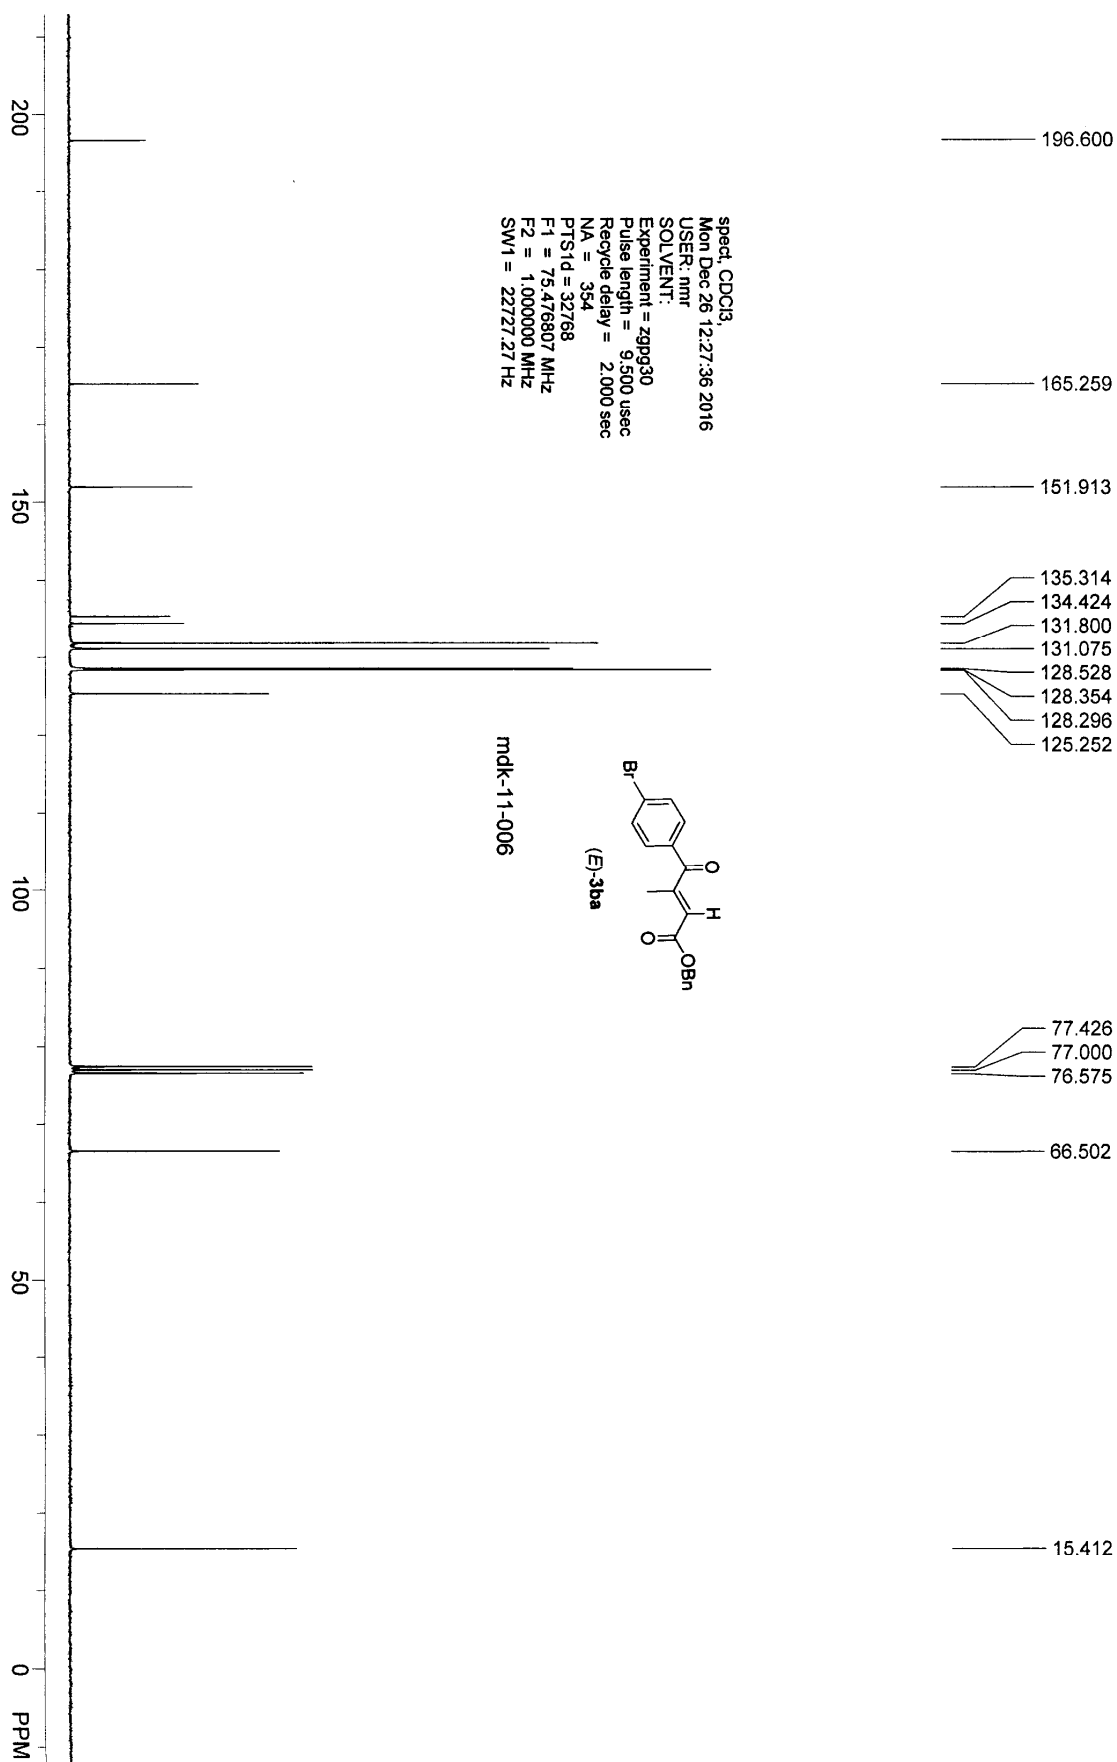

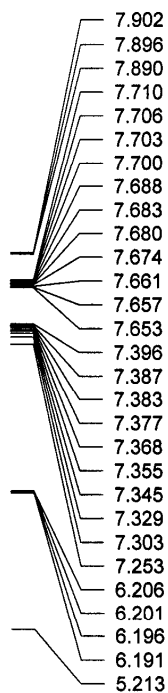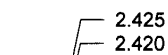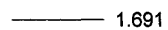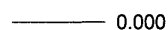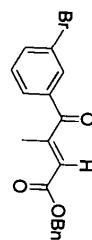

spect, CDCl<sub>3</sub>,  
Mon Jan 09 03:14:17 2017  
USER: nmr  
SOLVENT:  
Experiment = zg30  
Pulse length = 14.000 usec  
Recycle delay = 1.000 sec  
NA = 8  
PTSD = 32768  
F1 = 300.131866 MHz  
F2 = 1.000000 MHz  
SWH = 6188.12 Hz

mdk-11-035-1

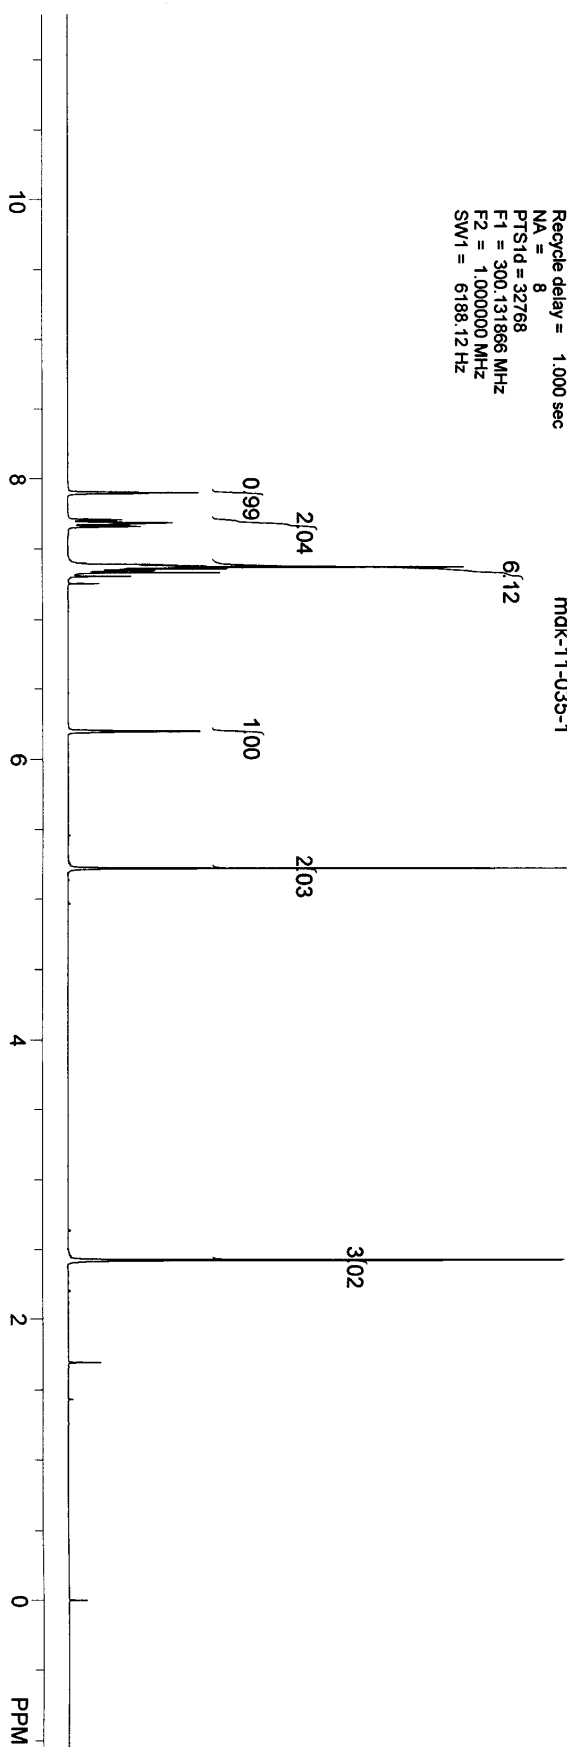



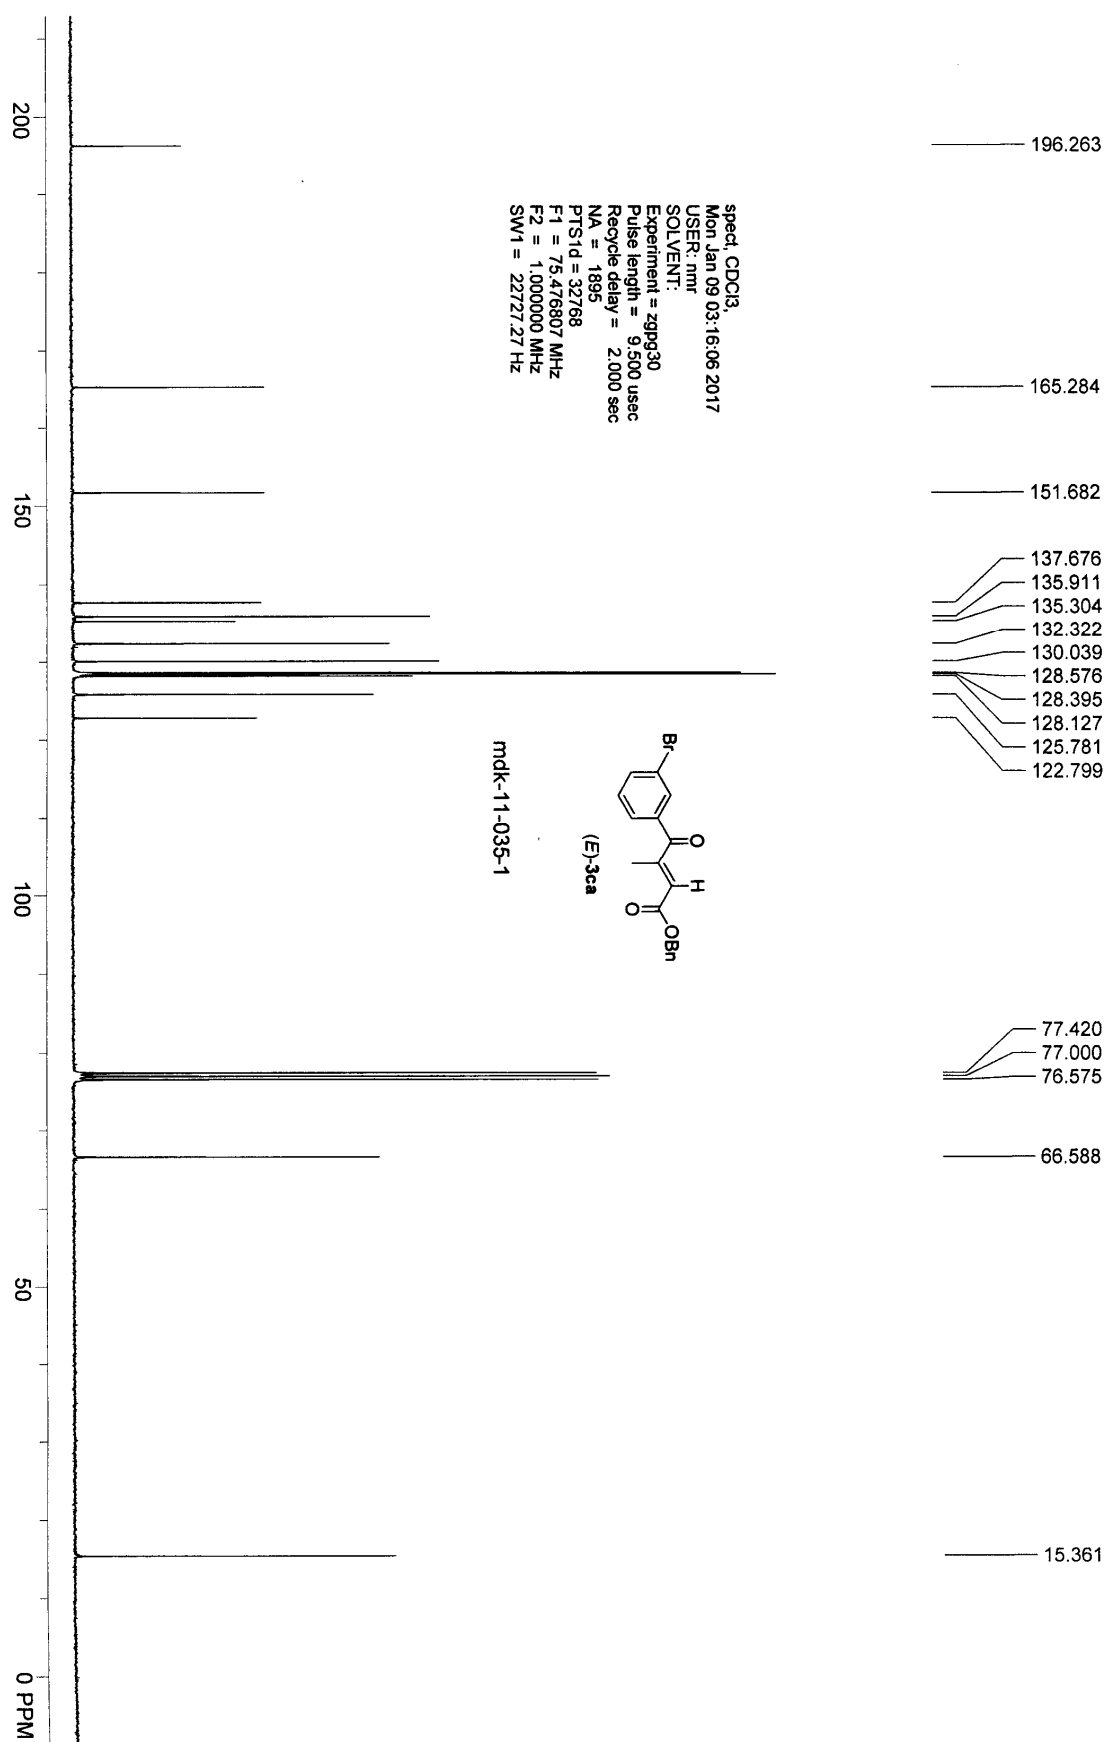

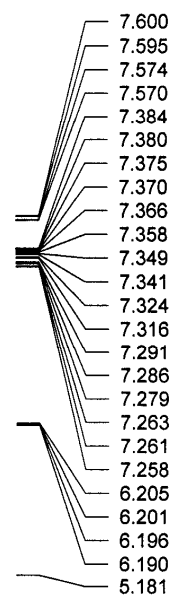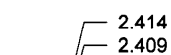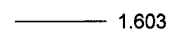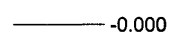

spect, CDCl<sub>3</sub>,  
Tue Feb 14 02:53:39 2017  
USER: nmr  
SOLVENT:  
Experiment = zg30  
Pulse length = 14.000 usec  
Recycle delay = 1.000 sec  
NA = 8  
PTSD = 32768  
F1 = 300.131866 MHz  
F2 = 1.000000 MHz  
SW1 = 6188.12 Hz

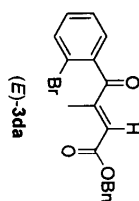

mdk-11-036

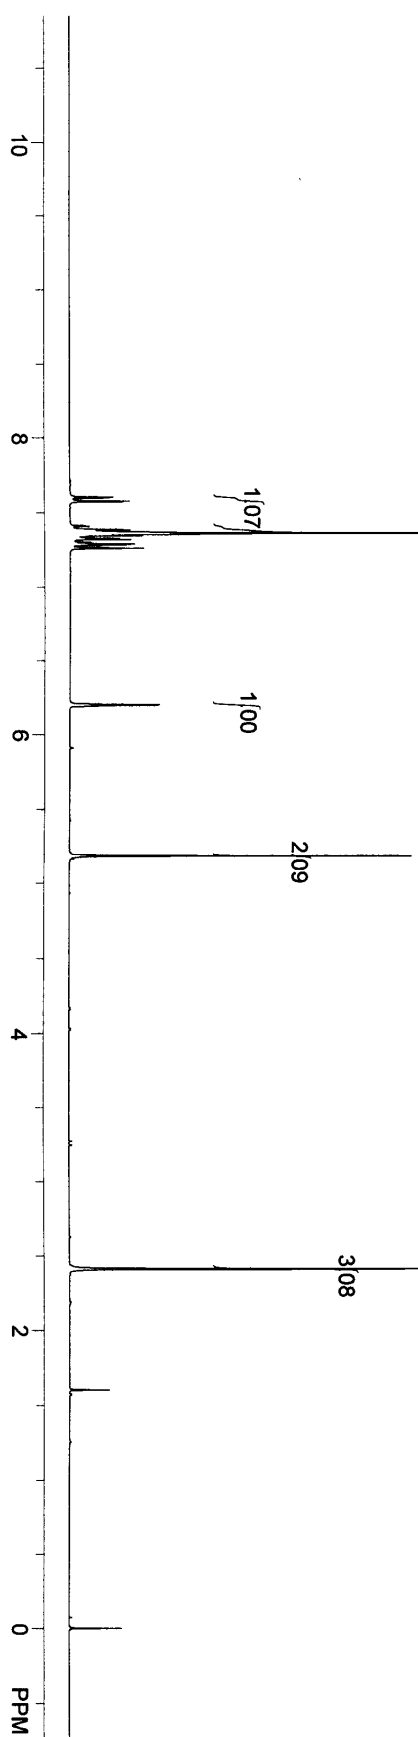

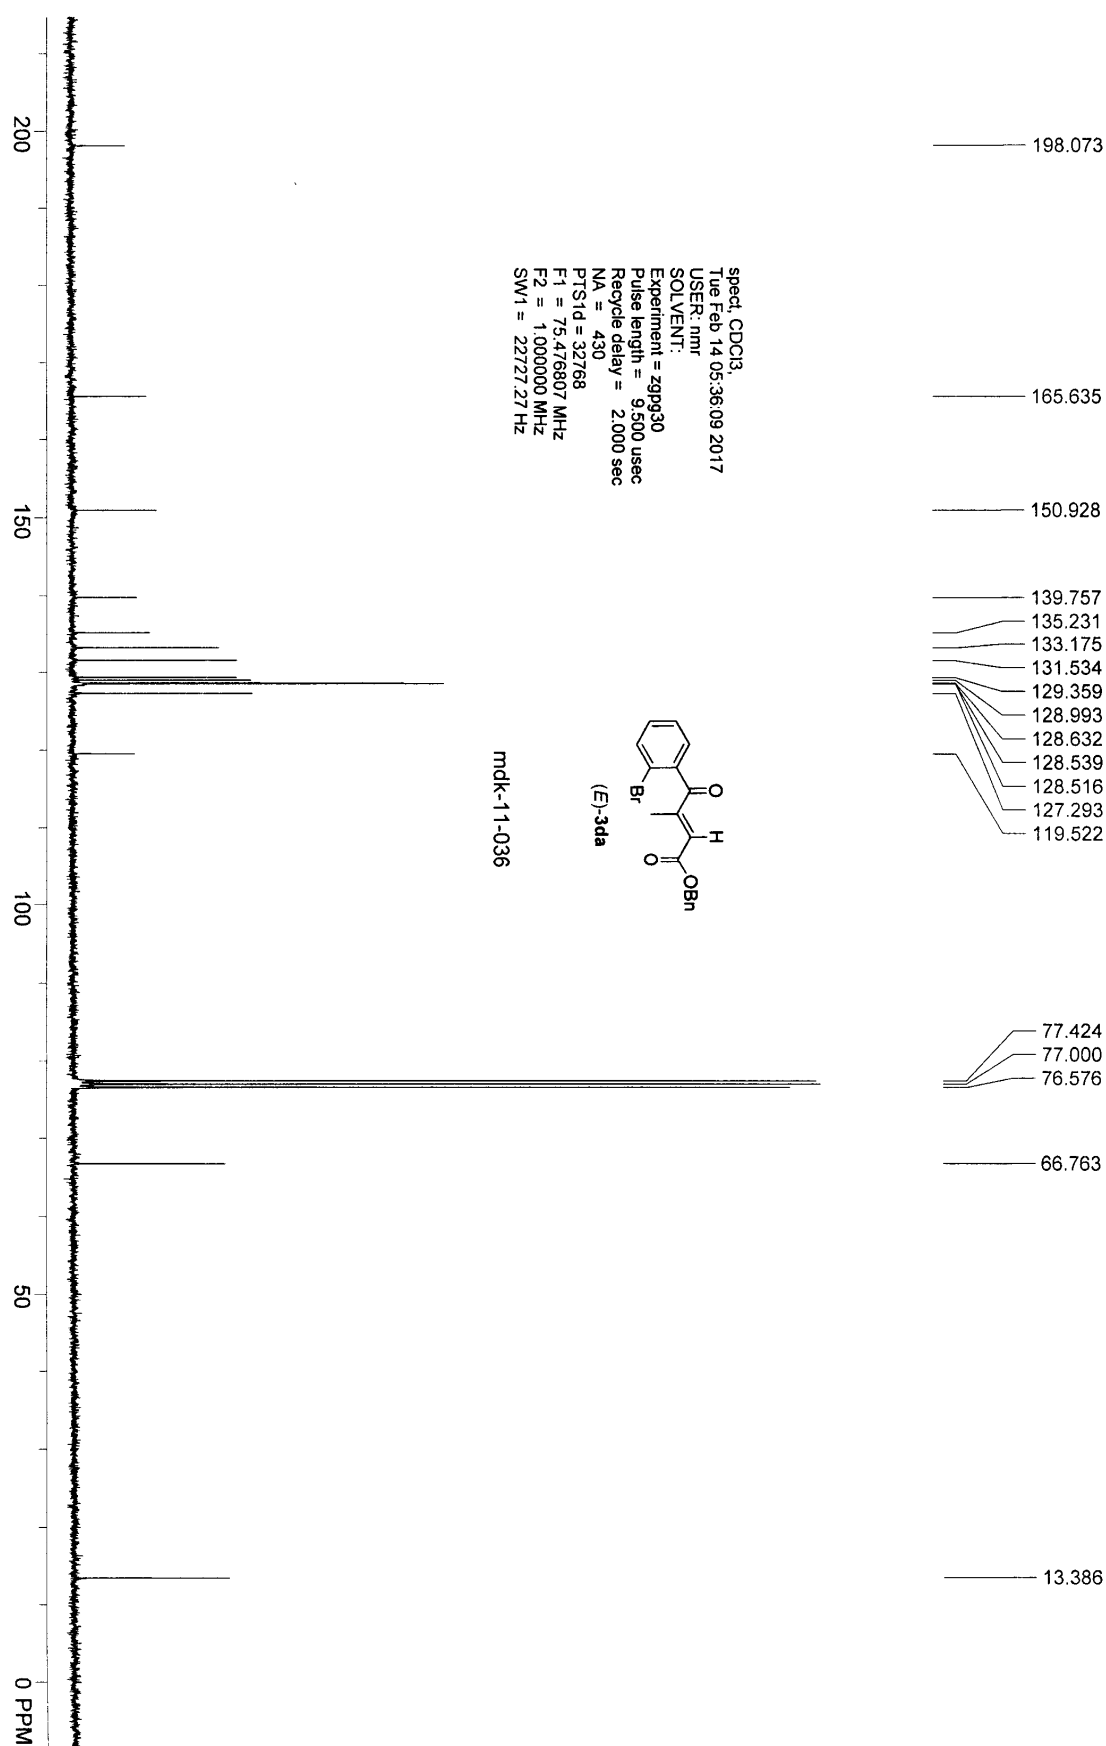

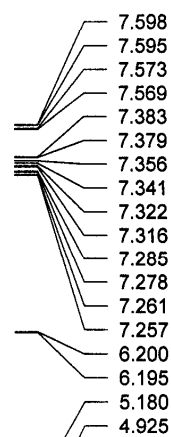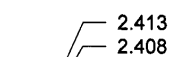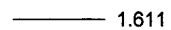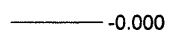

spect, CDCl<sub>3</sub>,  
 Tue Feb 14 13:15:14 2017  
 USER: nmf  
 SOLVENT:  
 Experiment = zg30  
 Pulse length = 14.000 usec  
 Recycle delay = 1.000 sec  
 NA = 8  
 PTD = 32768  
 F1 = 300.131866 MHz  
 F2 = 1.000000 MHz  
 SW1 = 6188.12 Hz

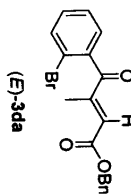

mdk-11-036-purity

7 uL CH<sub>2</sub>Br<sub>2</sub> as internal  
 standard in 33.2 mg sample

$$\text{purity} = \frac{0.2 \times 359.21 \times 0.4439}{33.2} \times 100\% = 96\%$$

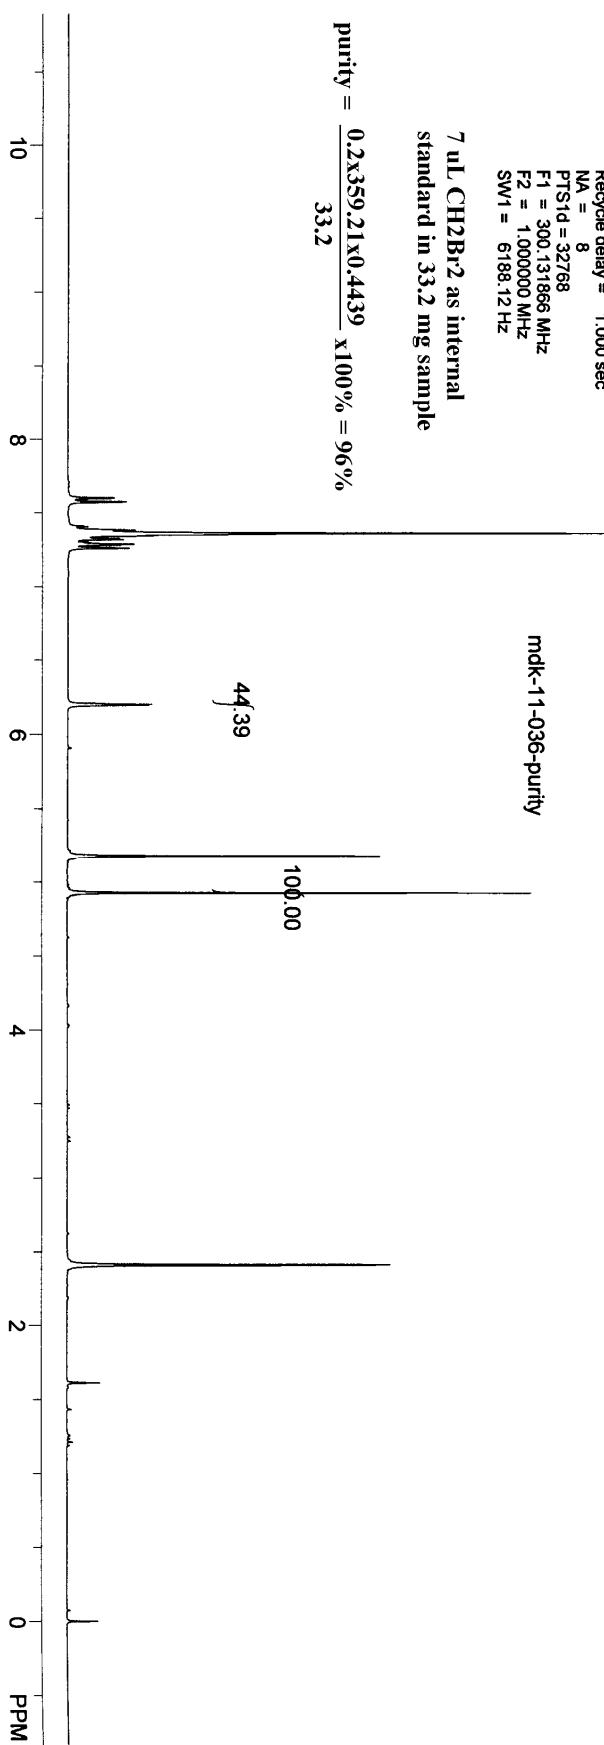

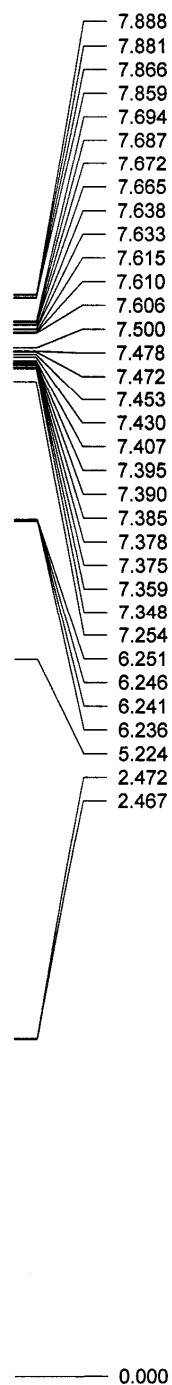

spect, CDCl<sub>3</sub>,  
 Tue Feb 28 11:37:34 2017  
 USER: nmr  
 SOLVENT:  
 Experiment = zg30  
 Pulse length = 14.000 usec  
 Recycle delay = 1.000 sec  
 NA = 8  
 PTS1d = 32768  
 F1 = 300.131866 MHz  
 F2 = 1.000000 MHz  
 SW1 = 6188.12 Hz

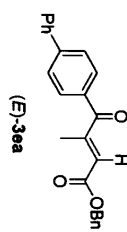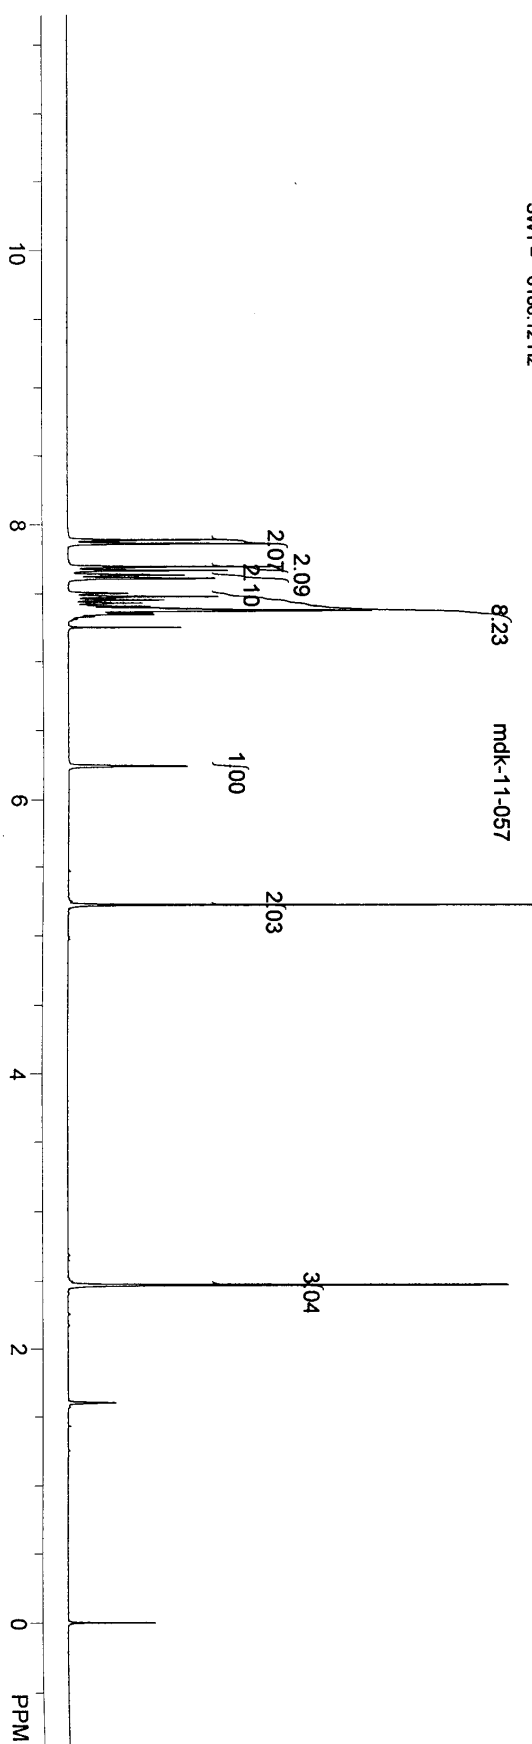

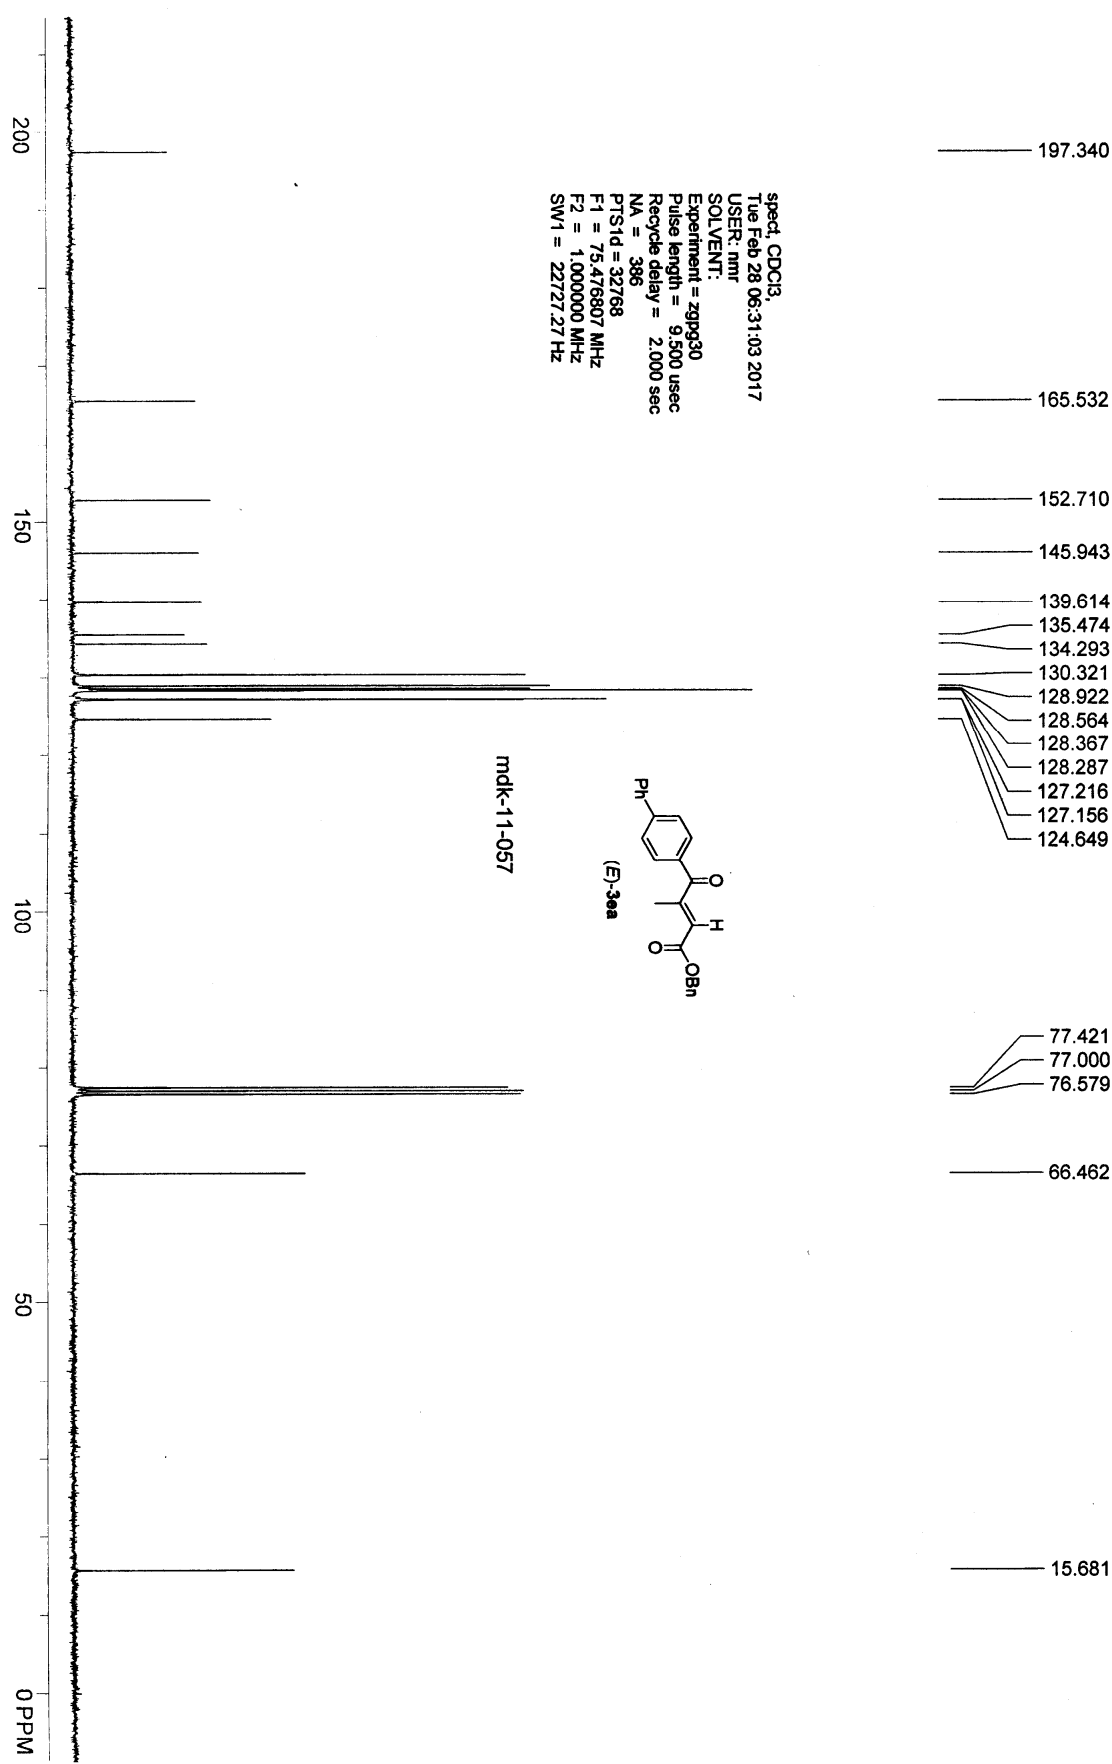

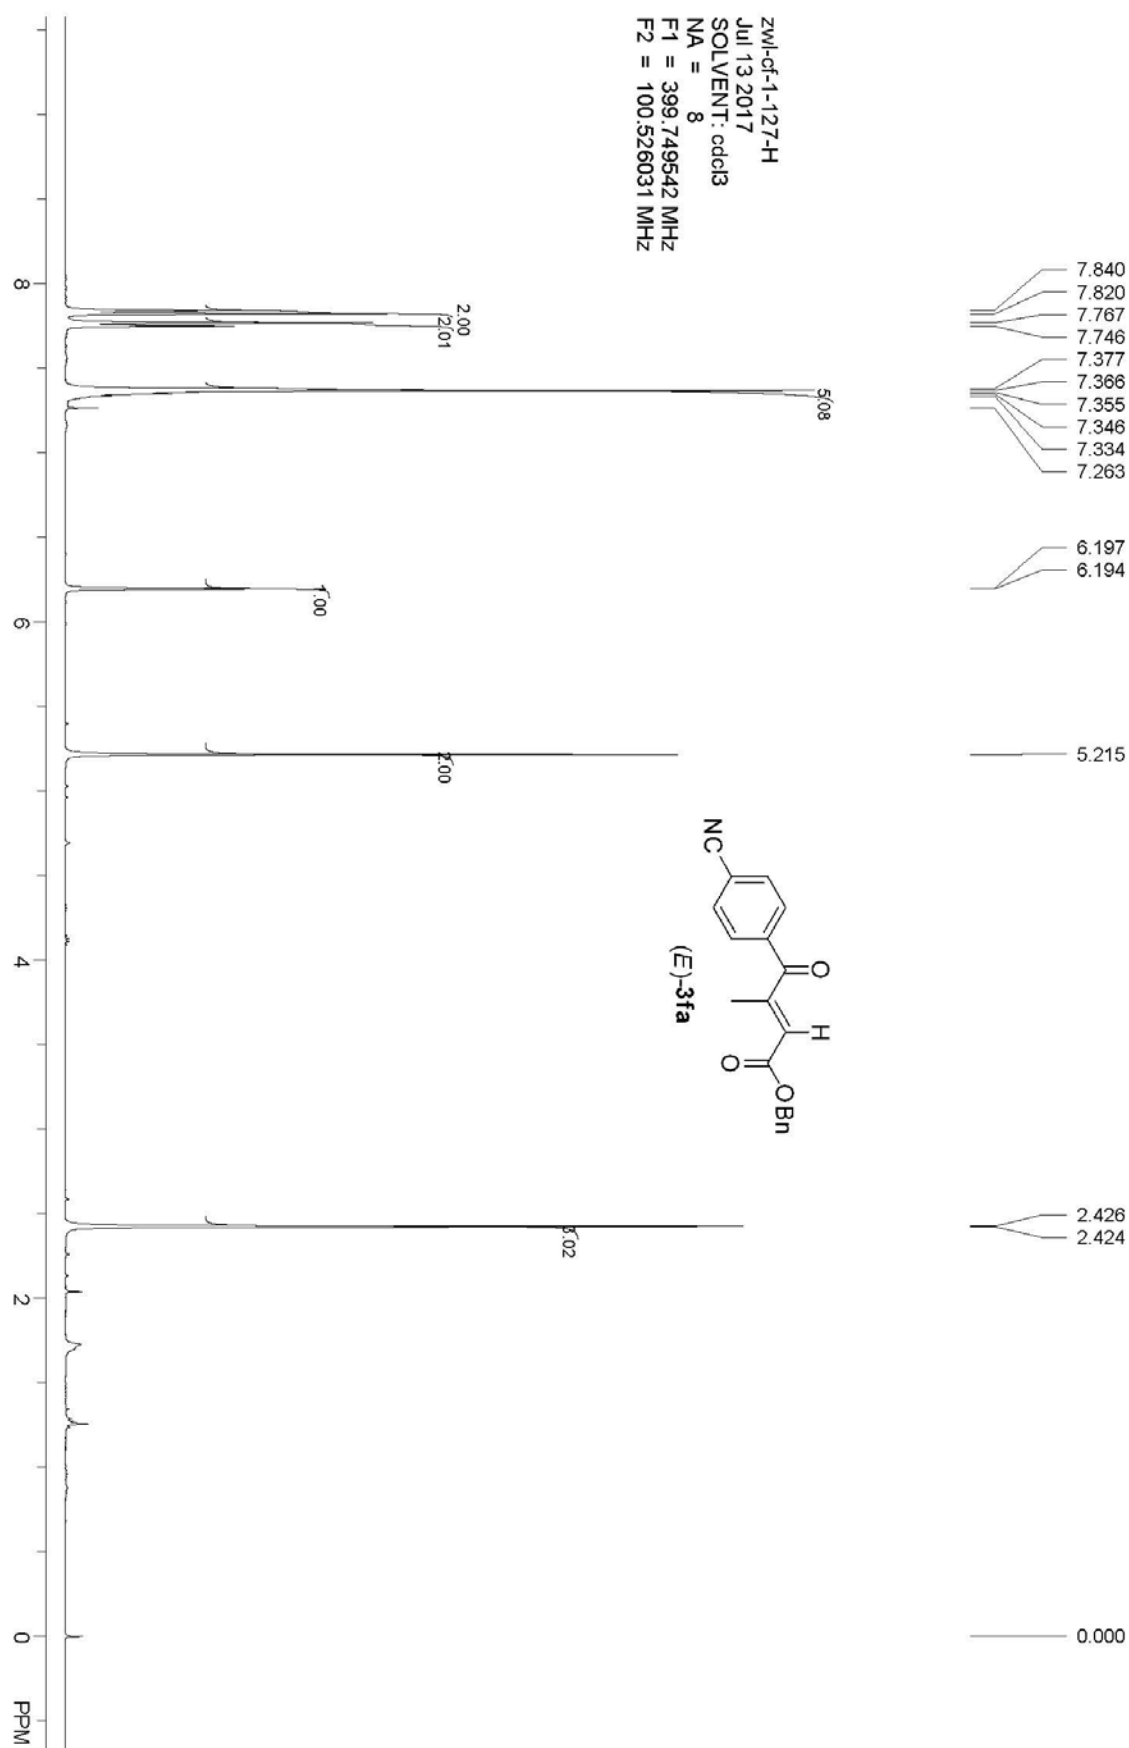

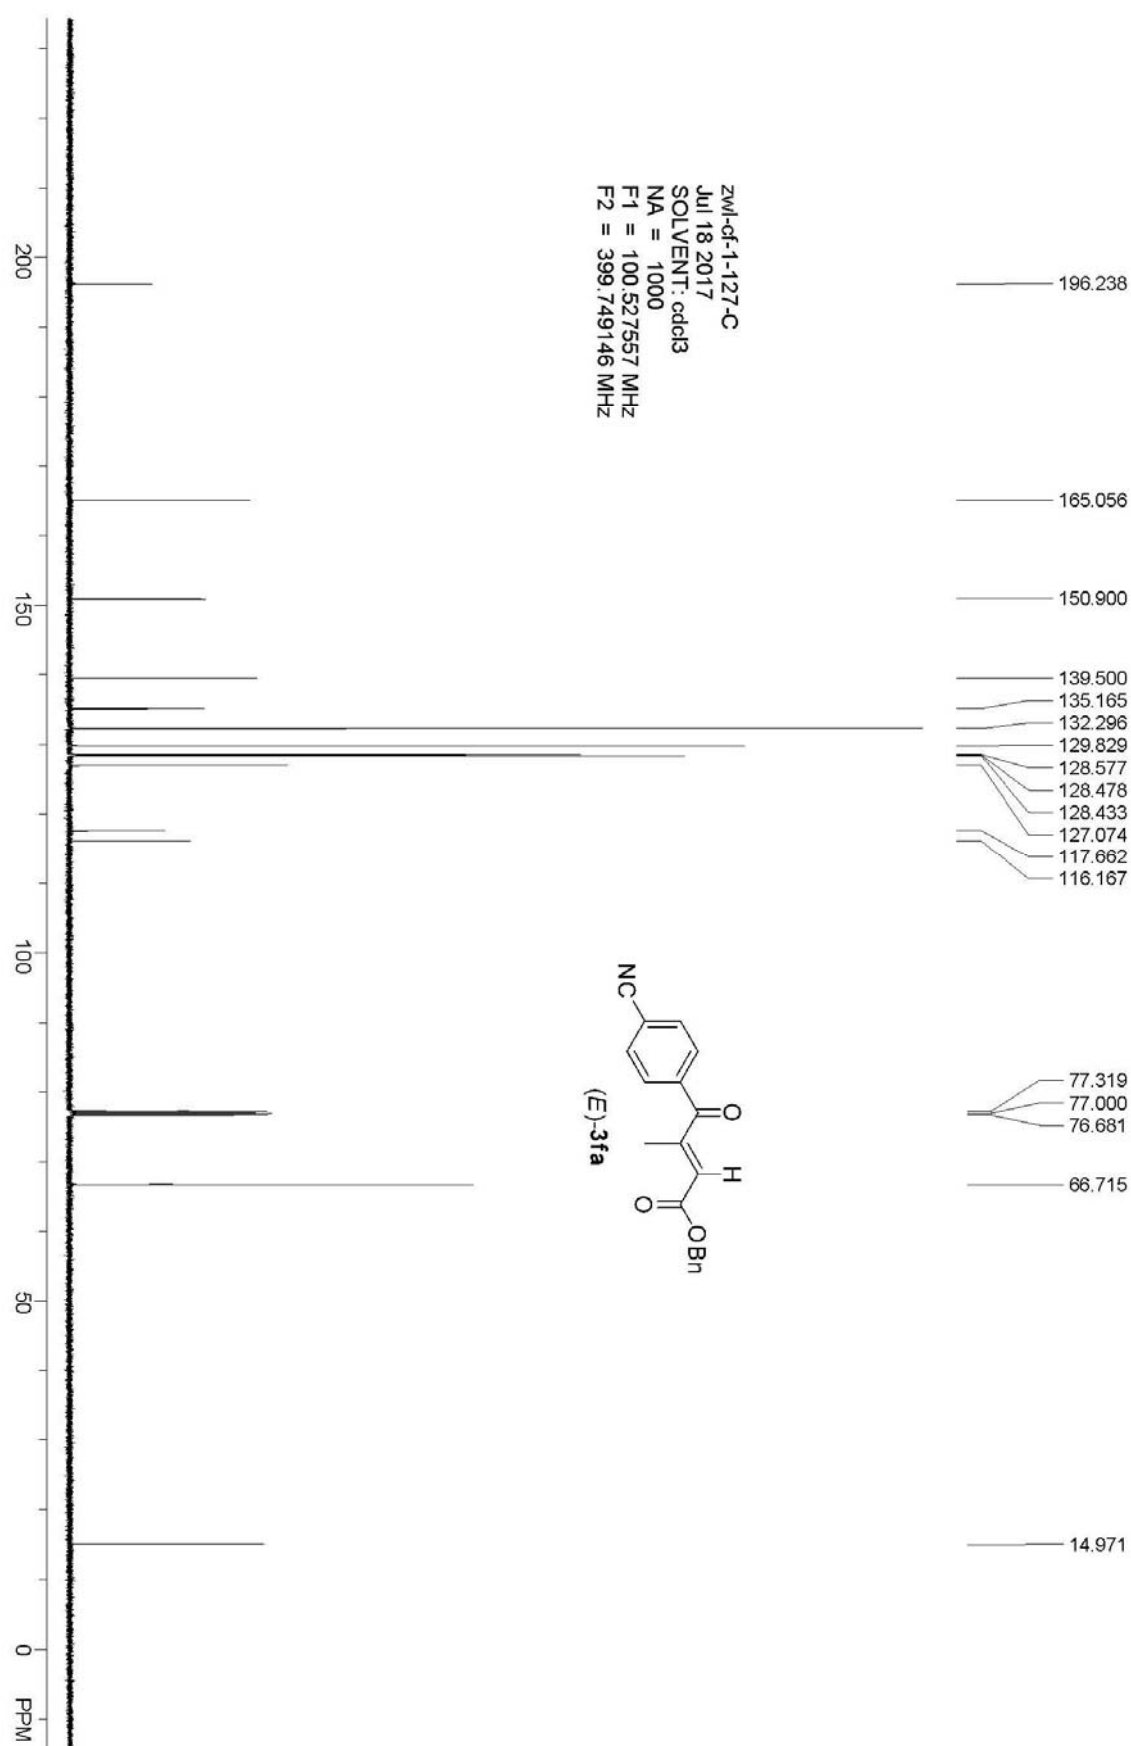



zwt-cf-1-127-purity  
 Jul 14 2017  
 SOLVENT: cdcl3  
 NA = 4  
 F1 = 399.749542 MHz  
 F2 = 100.526031 MHz

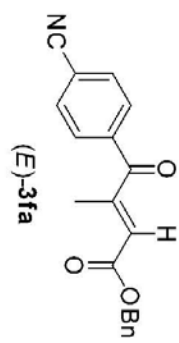

dibromomethane (7.0 uL, 0.1 mmol) as the  
 internal standard in 59.8 mg product

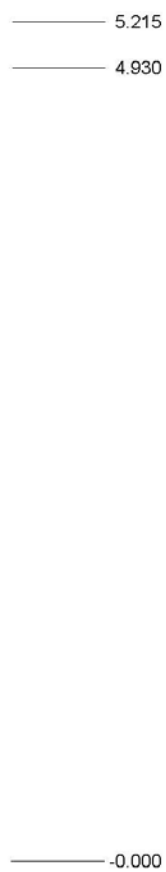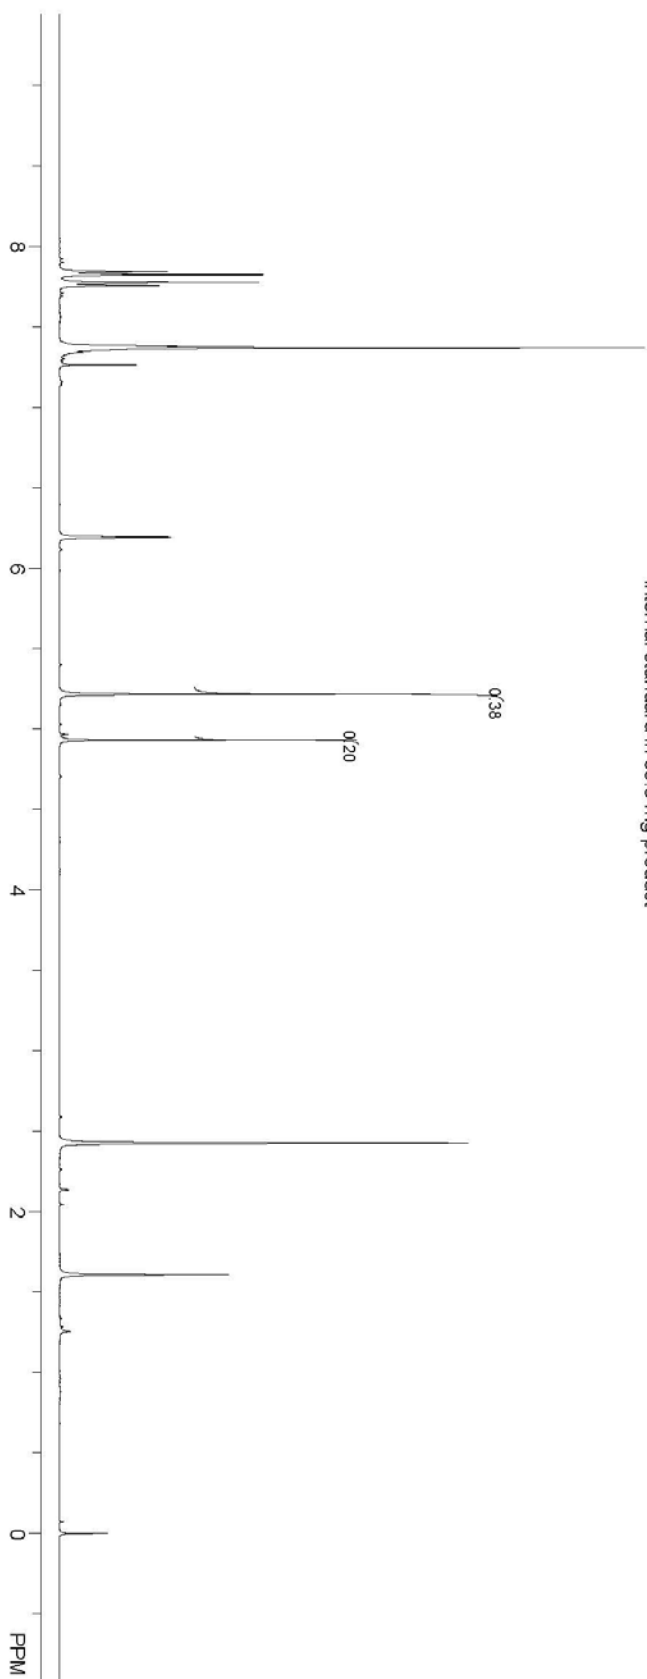

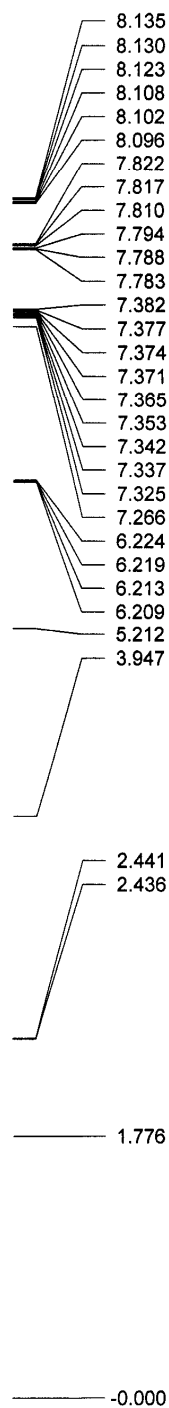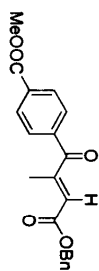

spect, CDCl<sub>3</sub>,  
Tue Dec 20 11:32:29 2016  
USER: nmr  
SOLVENT:  
Experiment = zg30  
Pulse length = 14.000 usec  
Recycle delay = 1.000 sec  
NA = 8  
PTStd = 32768  
F1 = 300.131866 MHz  
F2 = 100.000000 MHz  
SW1 = 6188.12 Hz

mdk-10-184

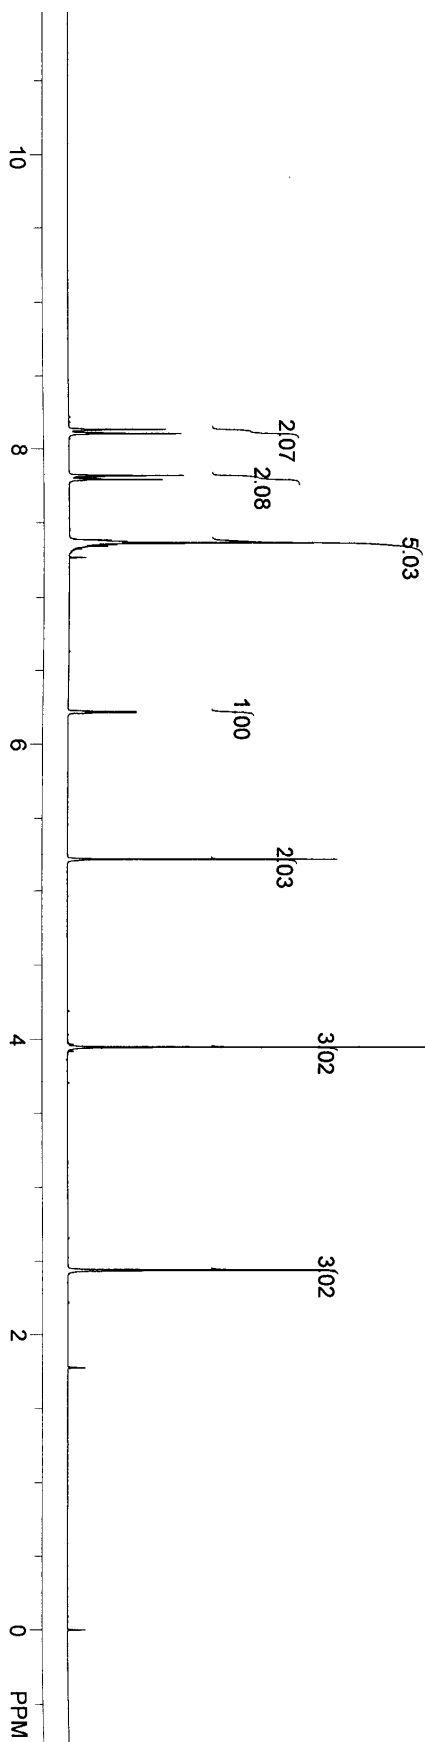

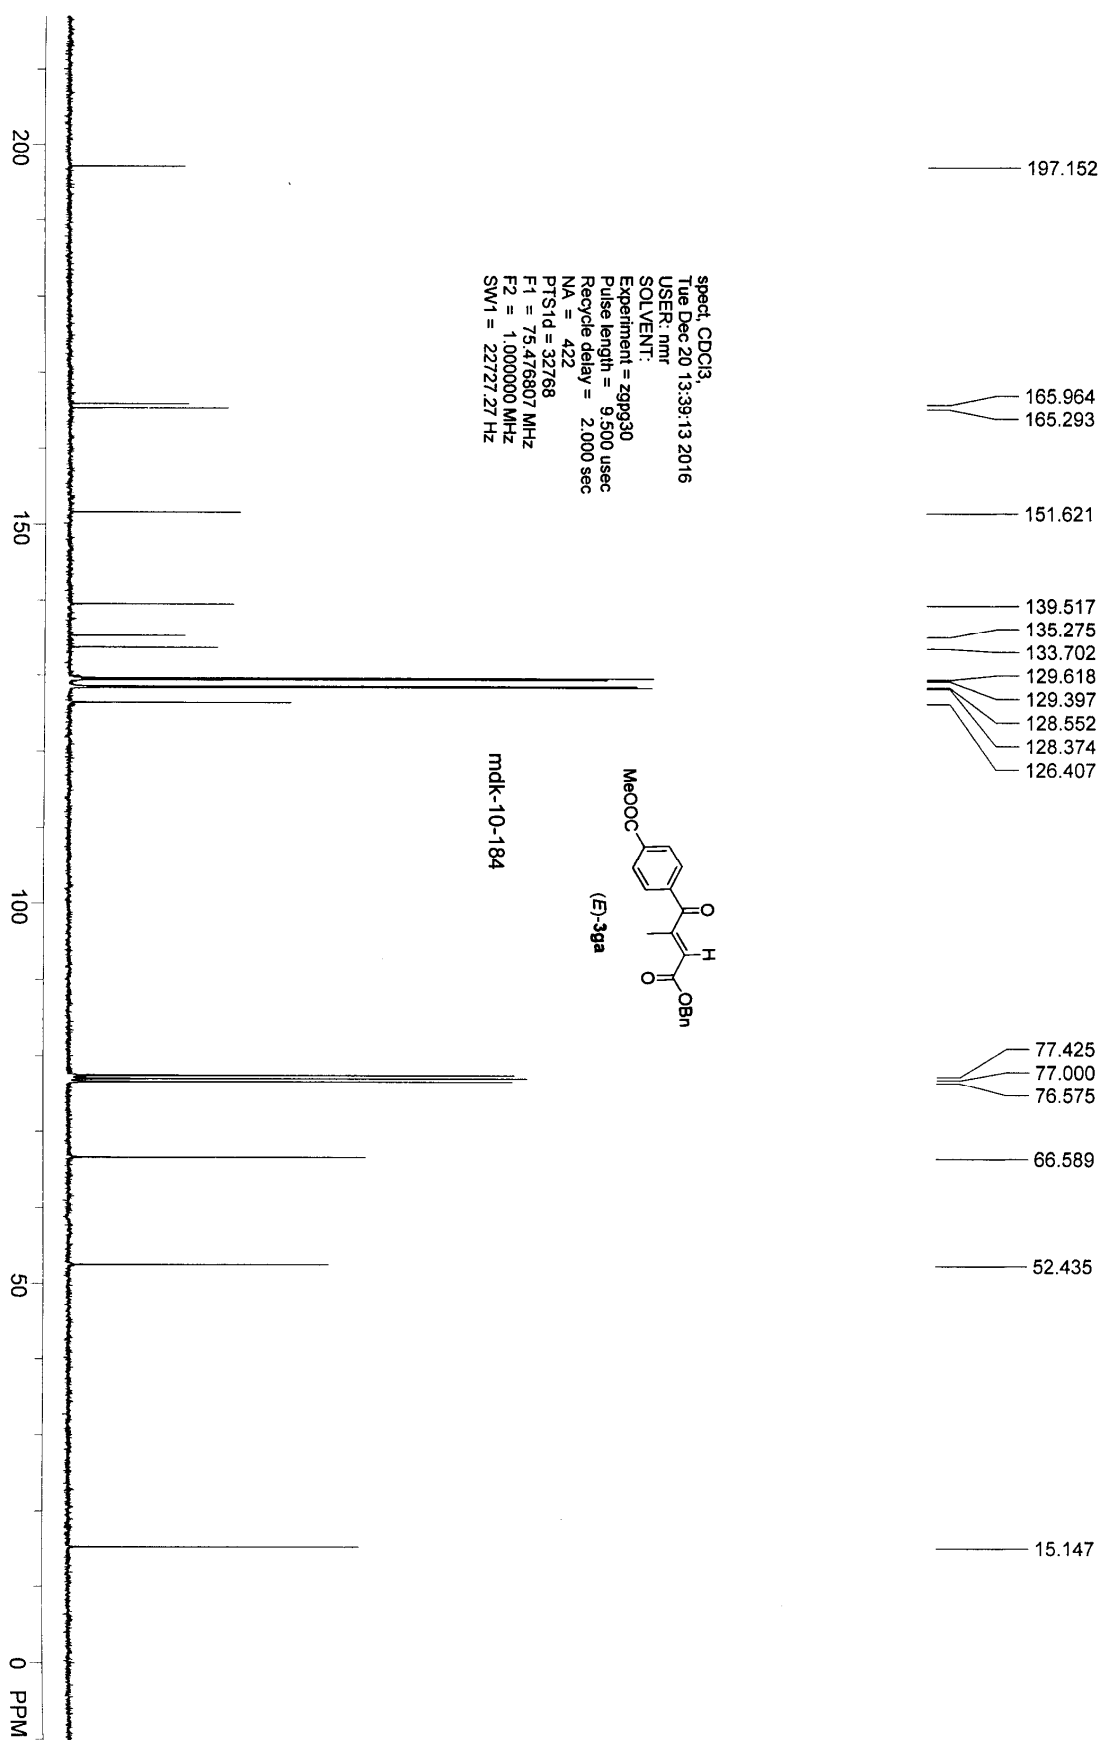

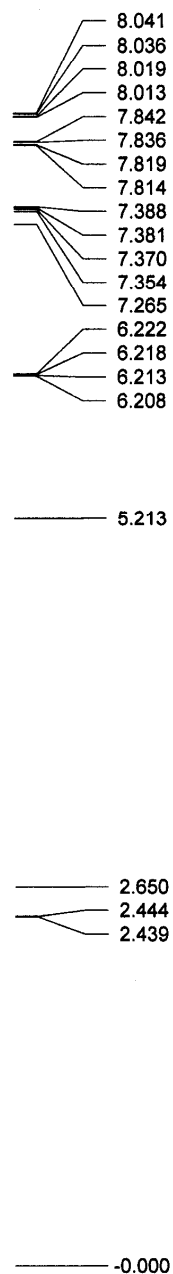

spec4, CDC13,  
 Mon Feb 27 06:40:28 2017  
 USER: nmr  
 SOLVENT:  
 Experiment = zg30  
 Pulse length = 14.000 usec  
 Recycle delay = 1.000 sec  
 NA = 8  
 P1 = 32768  
 F1 = 300.131866 MHz  
 F2 = 1.000000 MHz  
 SW1 = 6188.12 Hz

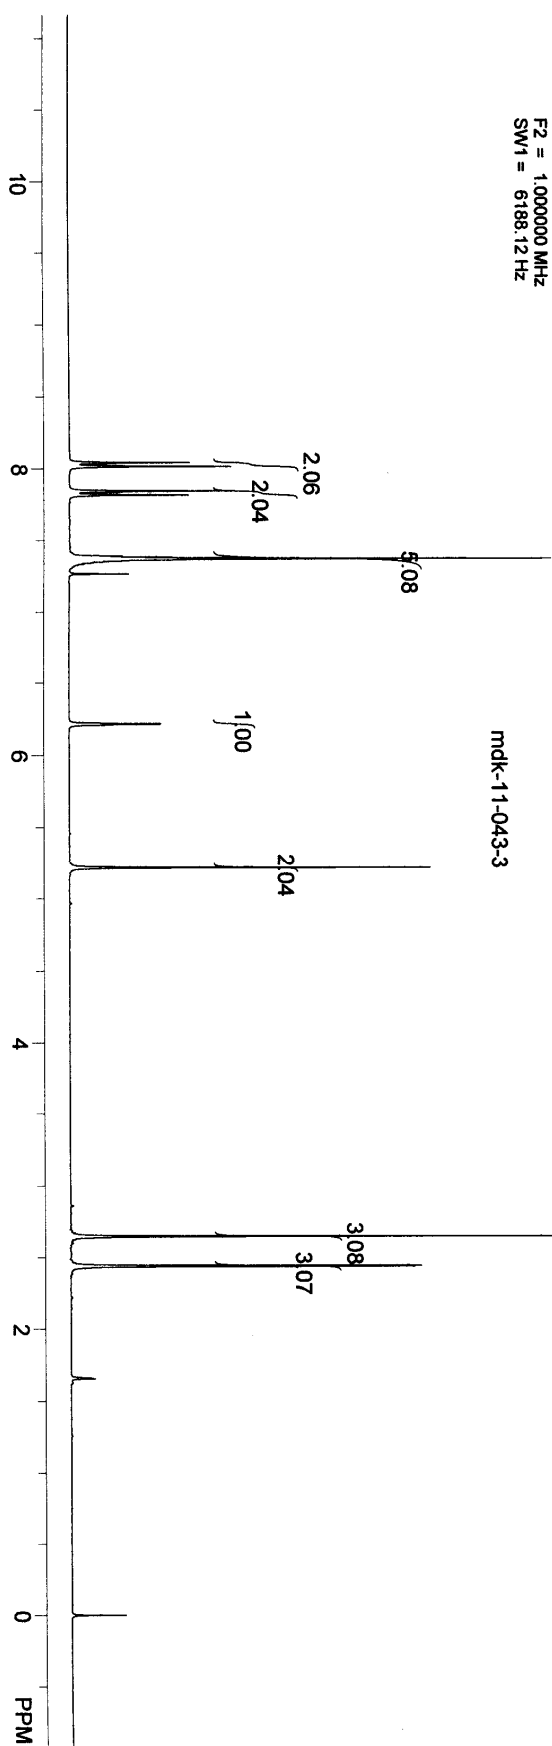

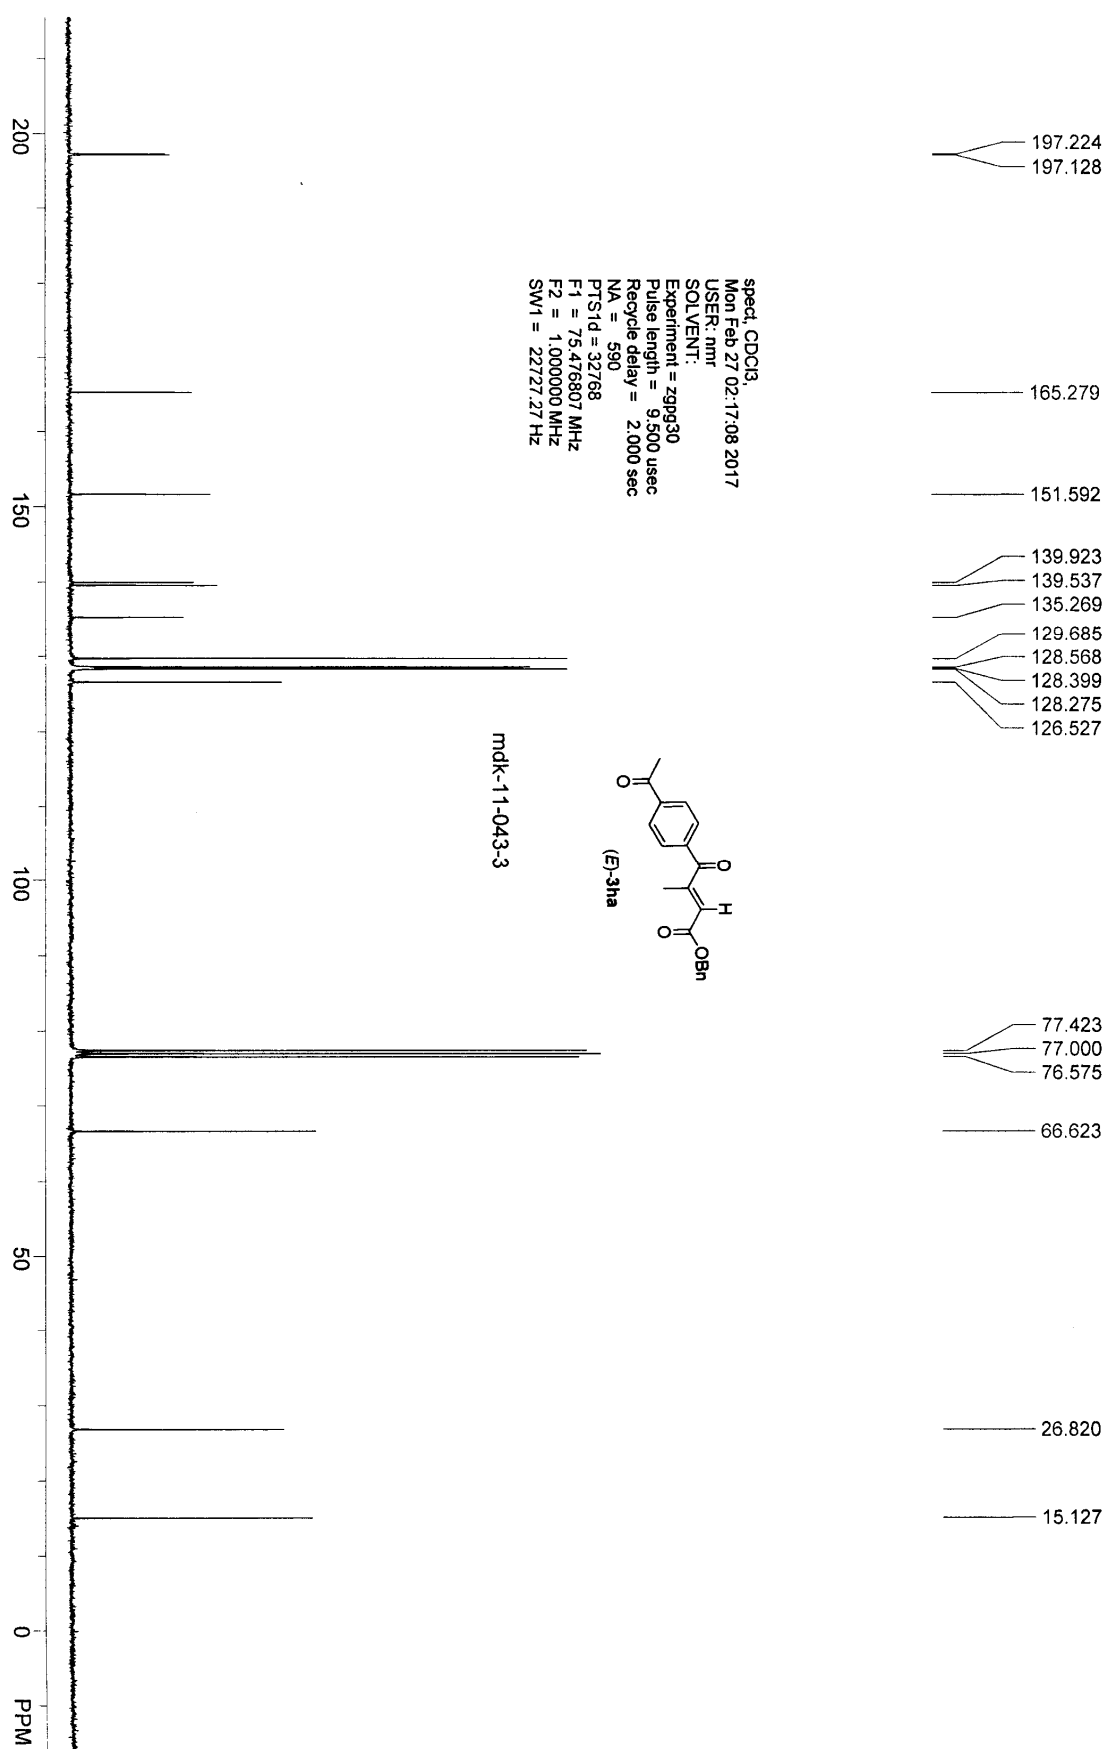

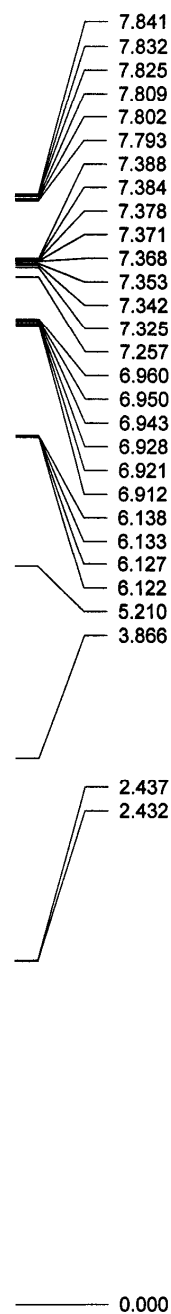

spec: CDCl<sub>3</sub>  
Fri May 19 02:13:29 2017  
USER: nmr  
SOLVENT:  
Experiment = zg30  
Pulse length = 14.000 usec  
Recycle delay = 1.000 sec  
NA = 8  
PTS1d = 32768  
F1 = 300.131866 MHz  
F2 = 1.000000 MHz  
SW1 = 6186.12 Hz

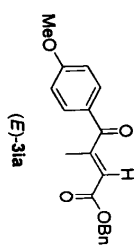

mdk-11-096

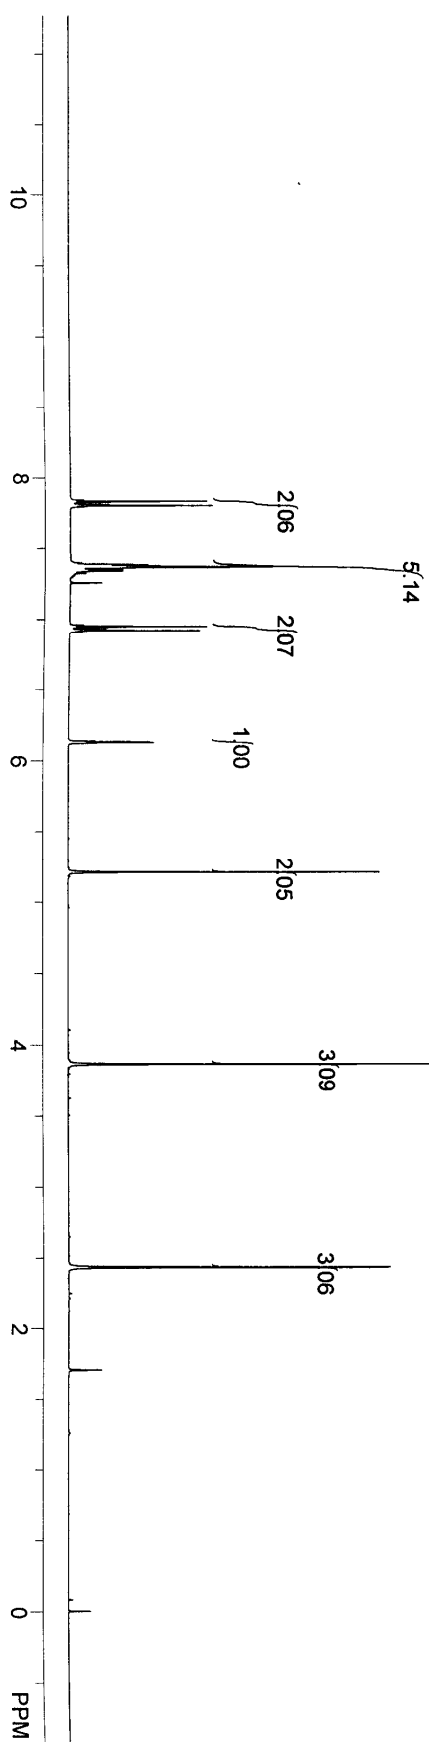

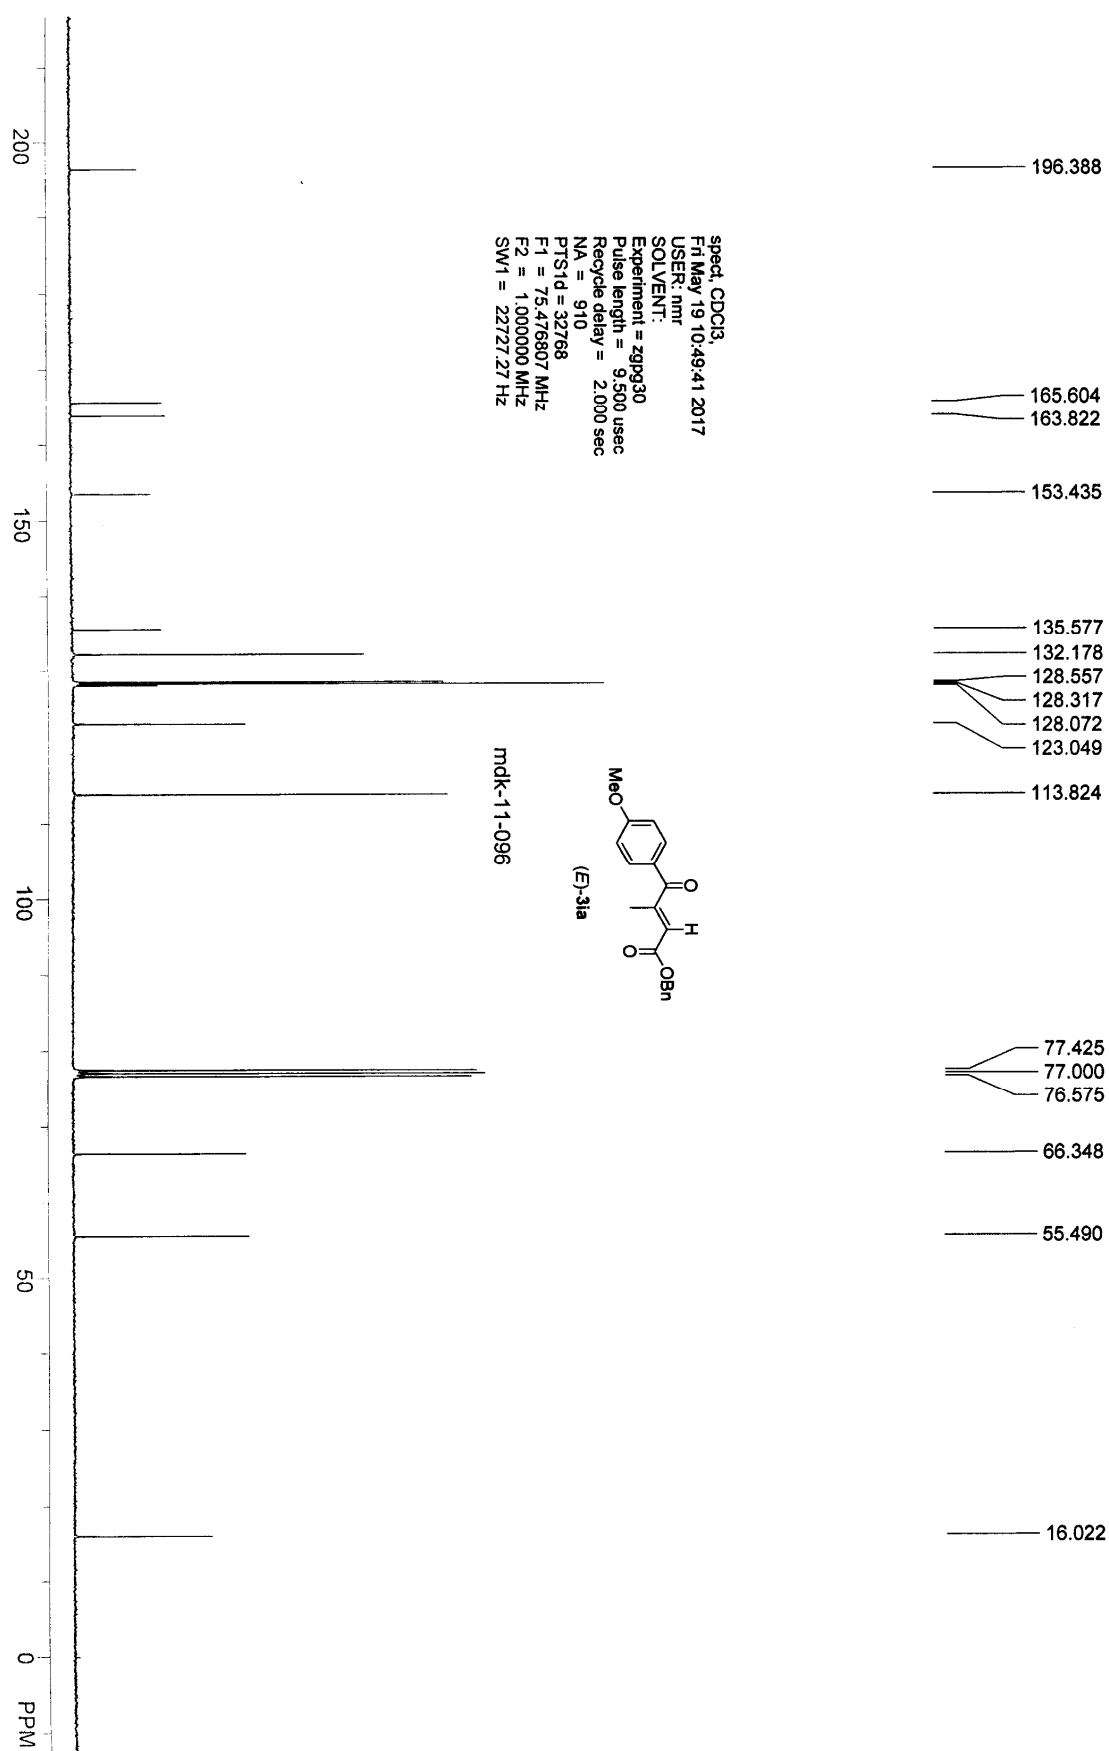

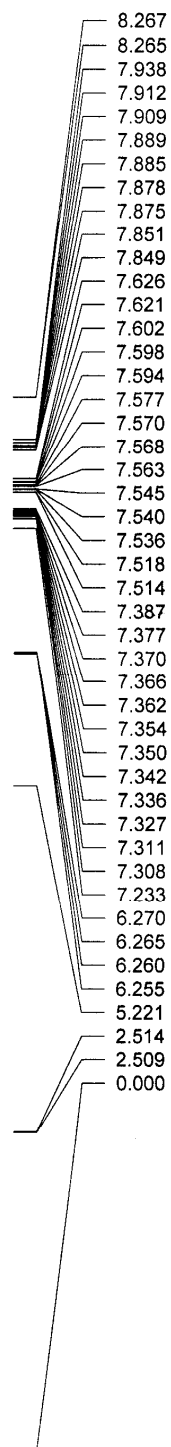

sped, CDCl<sub>3</sub>,  
 Sun Feb 12 10:29:22 2017  
 USER: nmf  
 SOLVENT:  
 Experiment = zg30  
 Pulse length = 14.000 usec  
 Recycle delay = 1.000 sec  
 NA = 8  
 PTD = 32768  
 F1 = 300.131866 MHz  
 F2 = 1.000000 MHz  
 SW1 = 6188.12 Hz

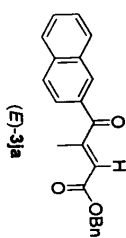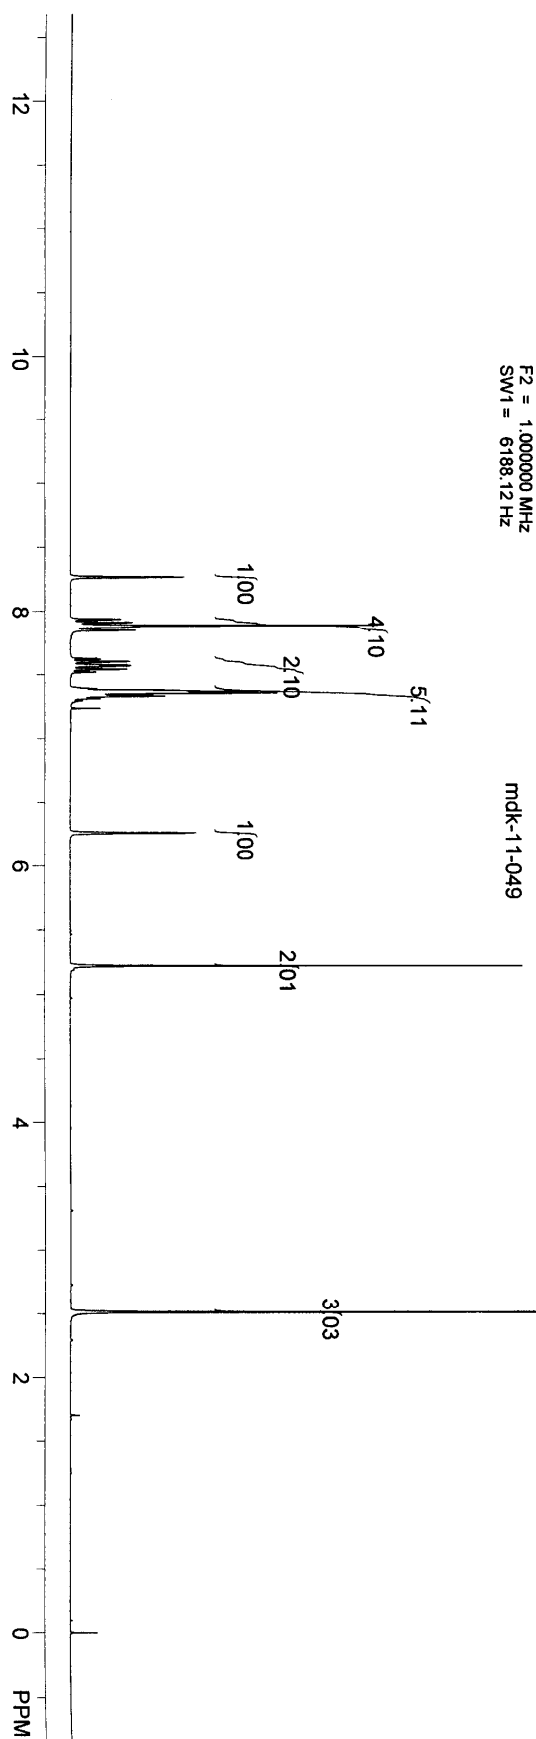



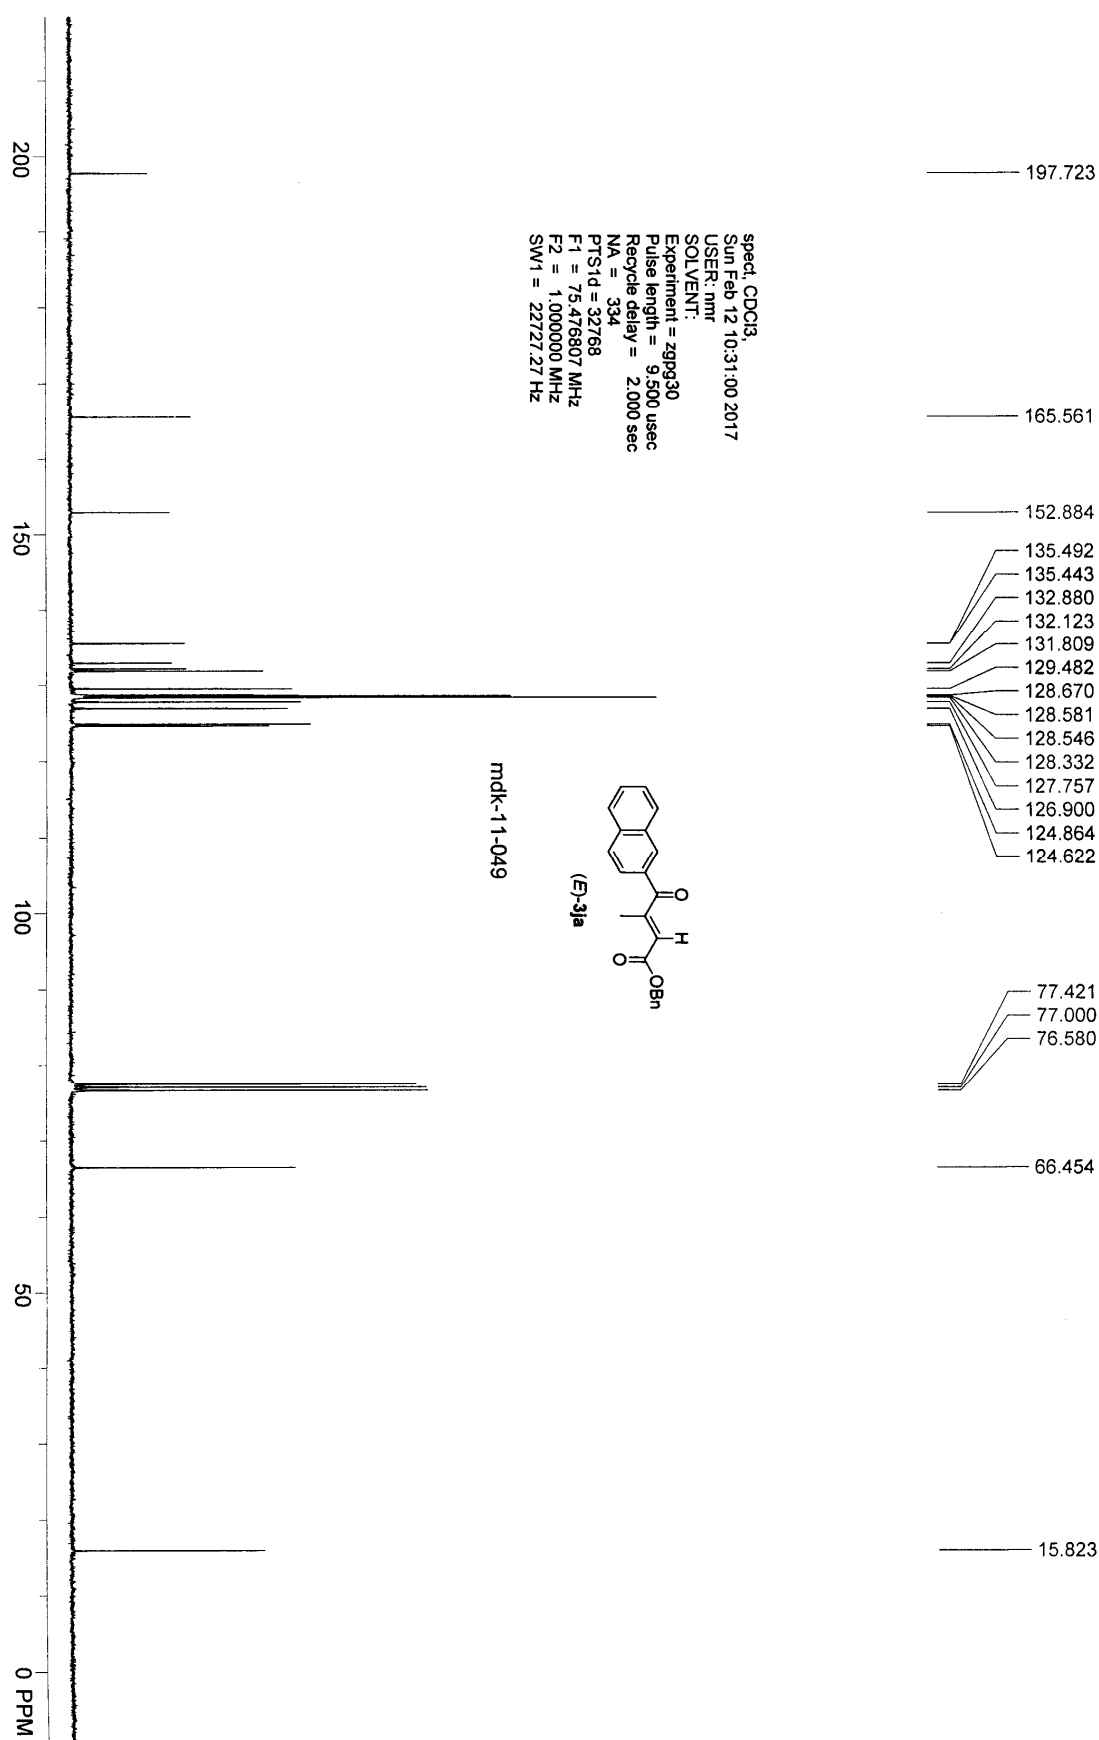

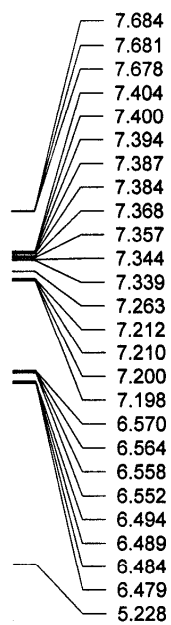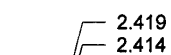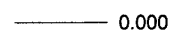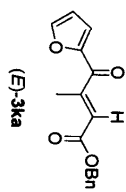

sped. CDCl<sub>3</sub>  
 Fri Apr 21 07:24:01 2017  
 USER: nmf  
 SOLVENT:  
 Experiment = zg30  
 Pulse length = 14.000 usec  
 Recycle delay = 1.000 sec  
 NA = 8  
 P1 = 32.768  
 P2 = 300.131866 MHz  
 F2 = 1.000000 MHz  
 SW1 = 6188.12 Hz

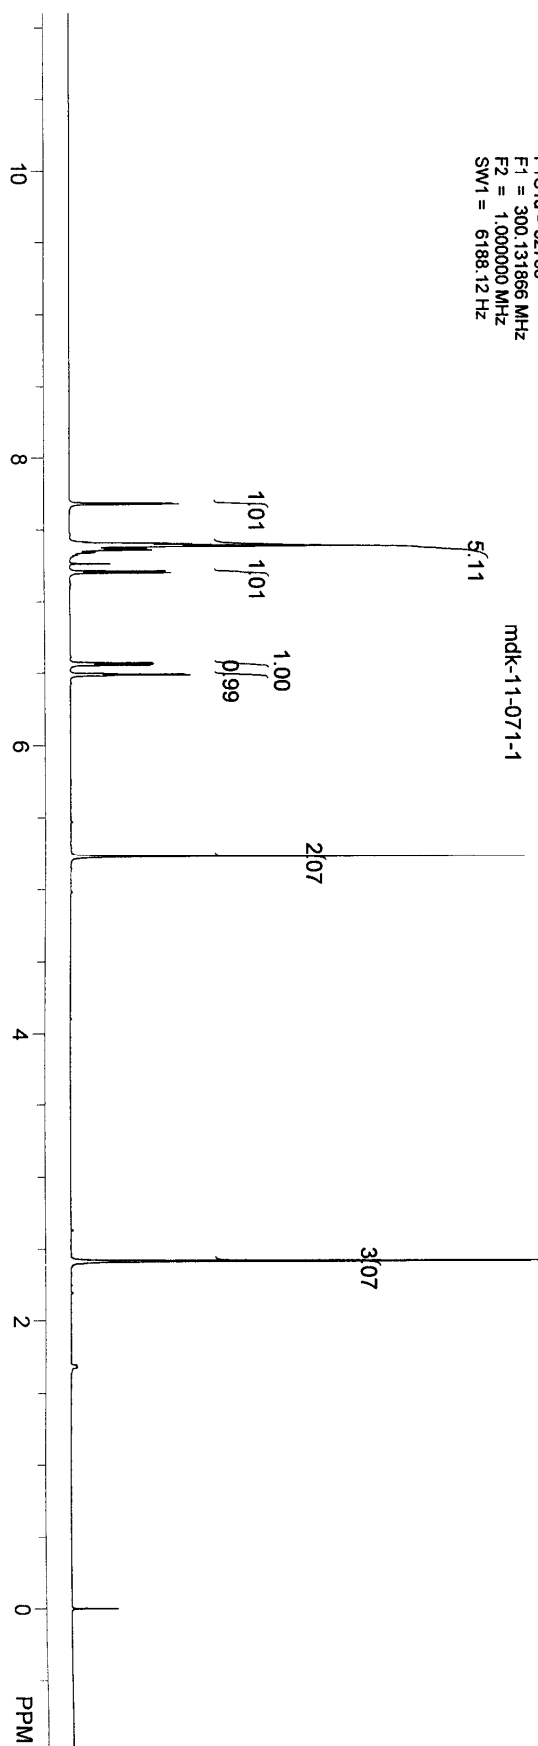

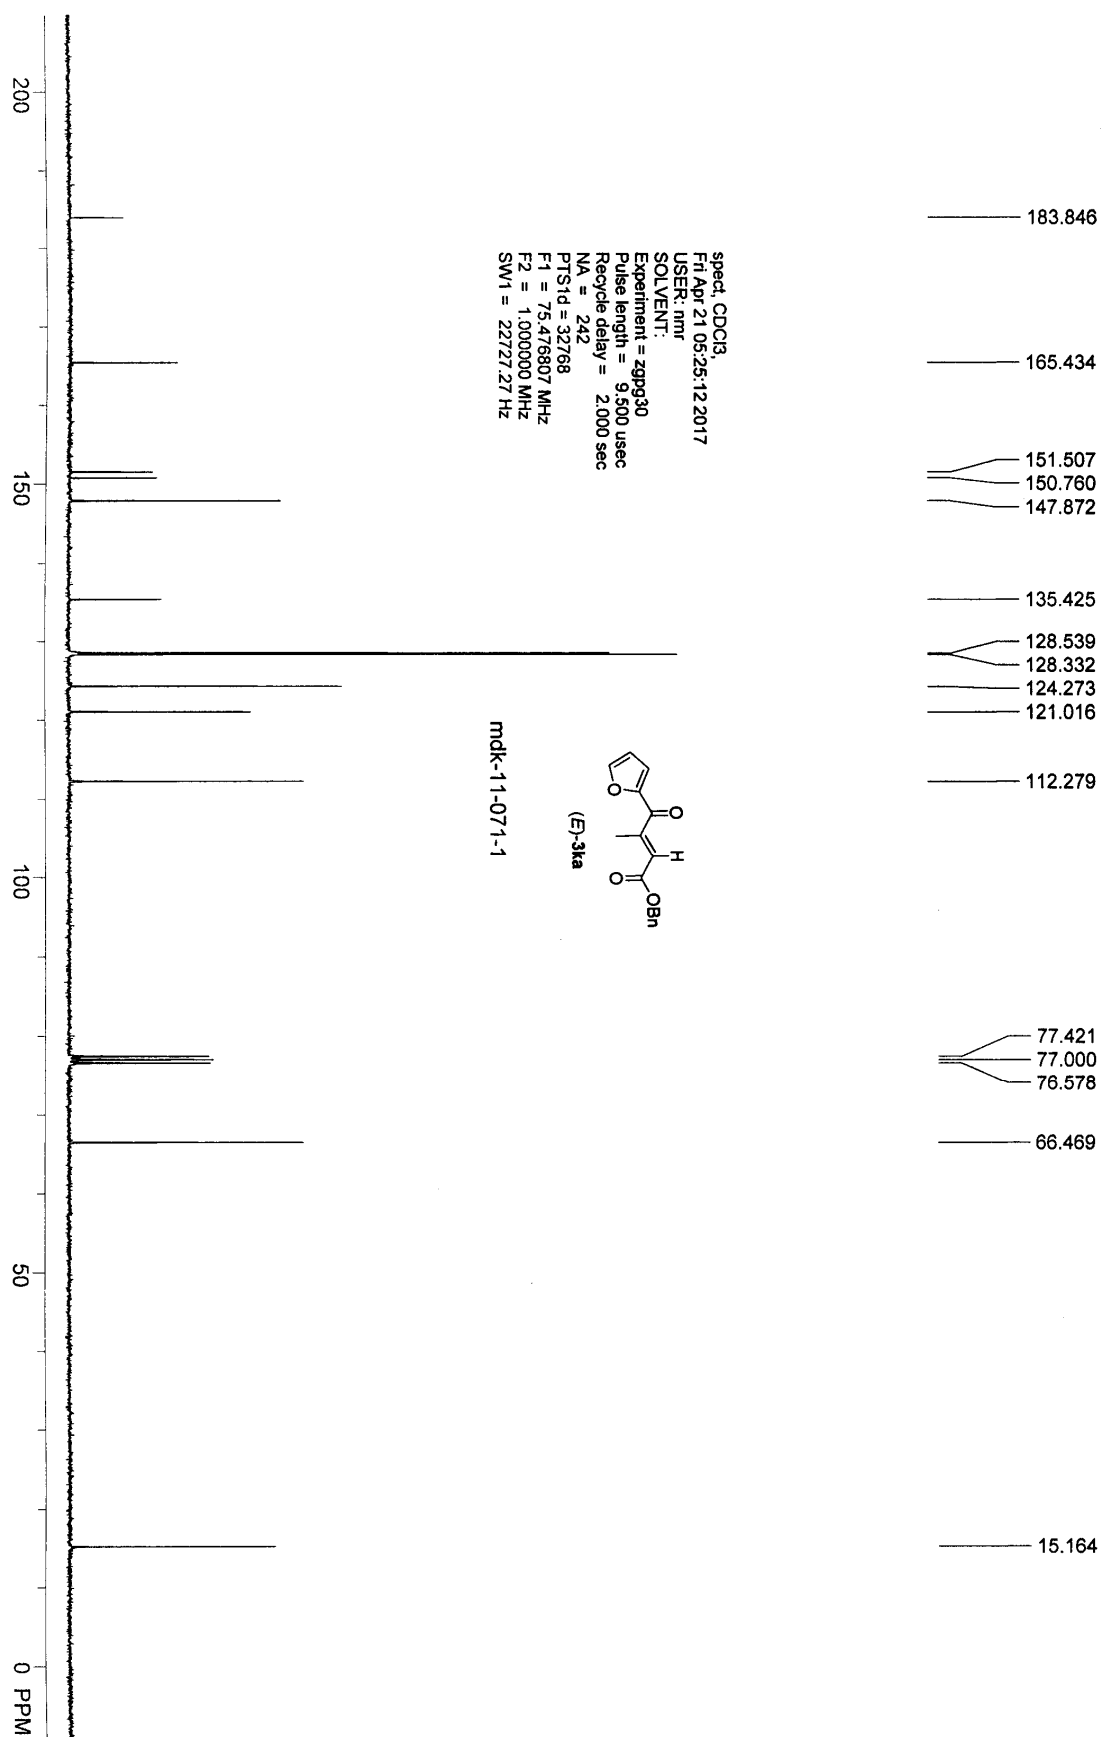

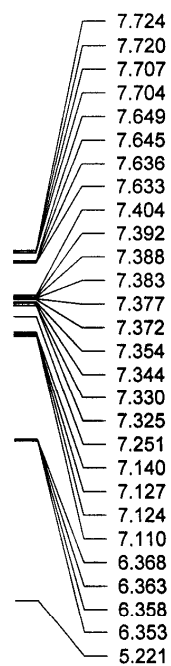

2.441  
2.436

0.000

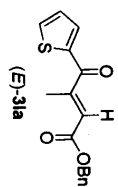

spect, CDCl<sub>3</sub>  
 Sun Apr 23 12:25:12 2017  
 USER: nmr  
 SOLVENT:  
 Experiment = zg30  
 Pulse length = 14.000 usec  
 Recycle delay = 1.000 sec  
 NA = 8  
 P1 = 32768  
 F1 = 300.131866 MHz  
 F2 = 1.000000 MHz  
 SW1 = 6188.12 Hz

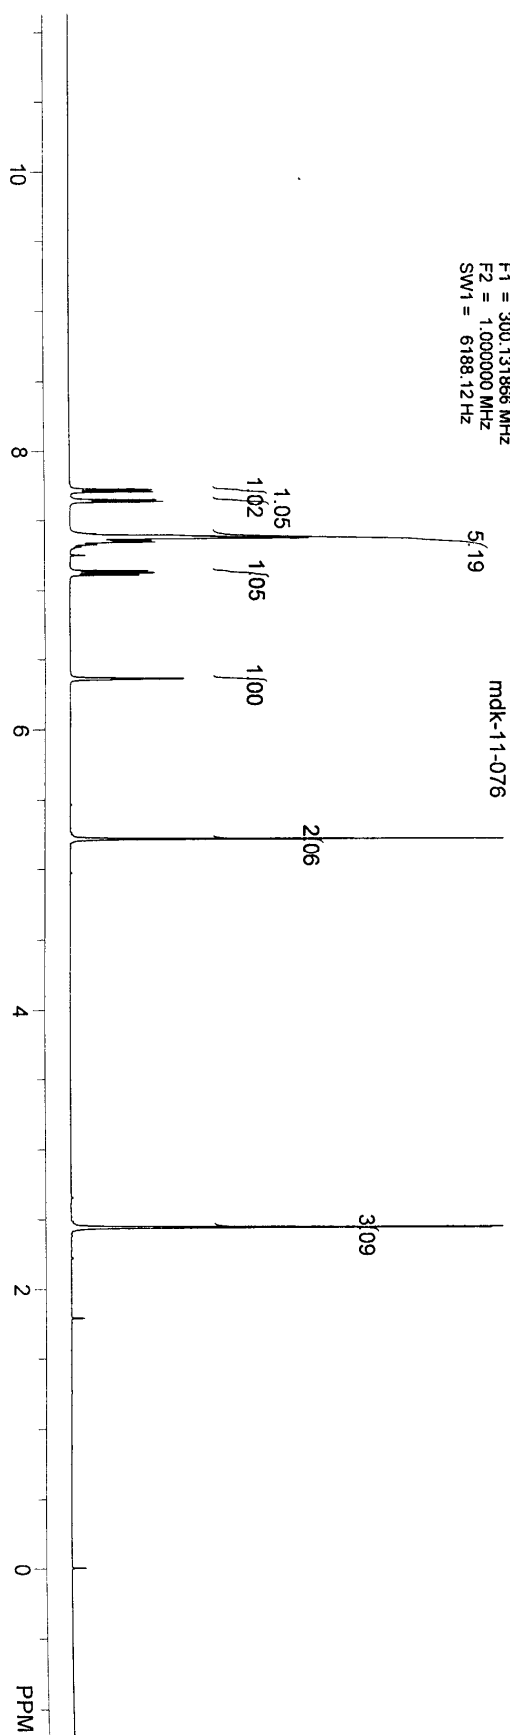

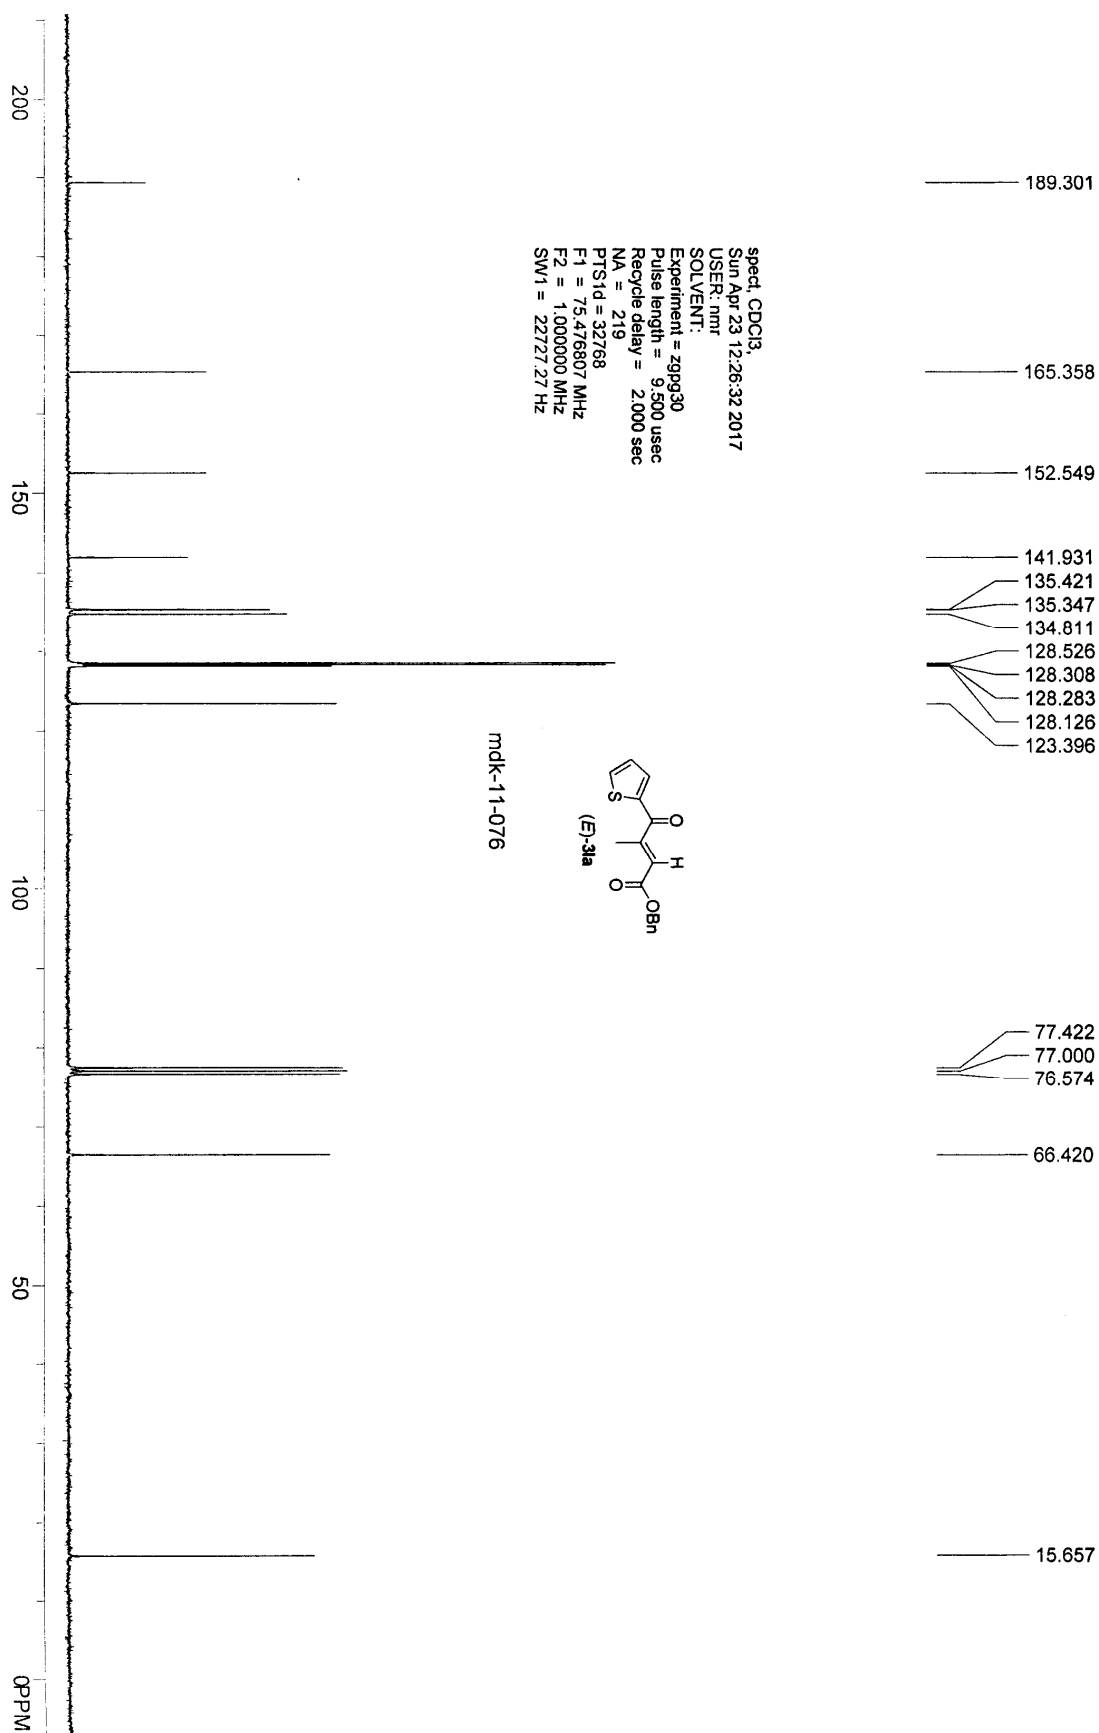

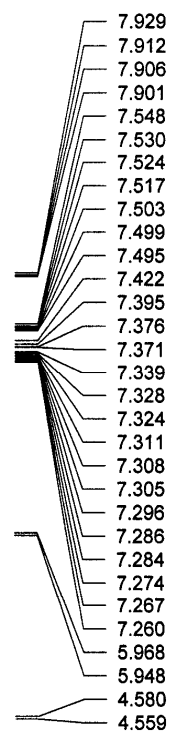

1.597

0.071  
-0.000

Spec: CDCl<sub>3</sub>  
F1 May 19 03:10:06 2017  
USER: nmr  
SOLVENT:  
Experiment = zg30  
Pulse length = 14.000 usec  
Recycle delay = 1.000 sec  
NA = 8  
PTSD = 32768  
F1 = 300.131866 MHz  
F2 = 1.000000 MHz  
SW1 = 6186.12 Hz

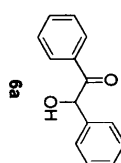

mdk-11-102

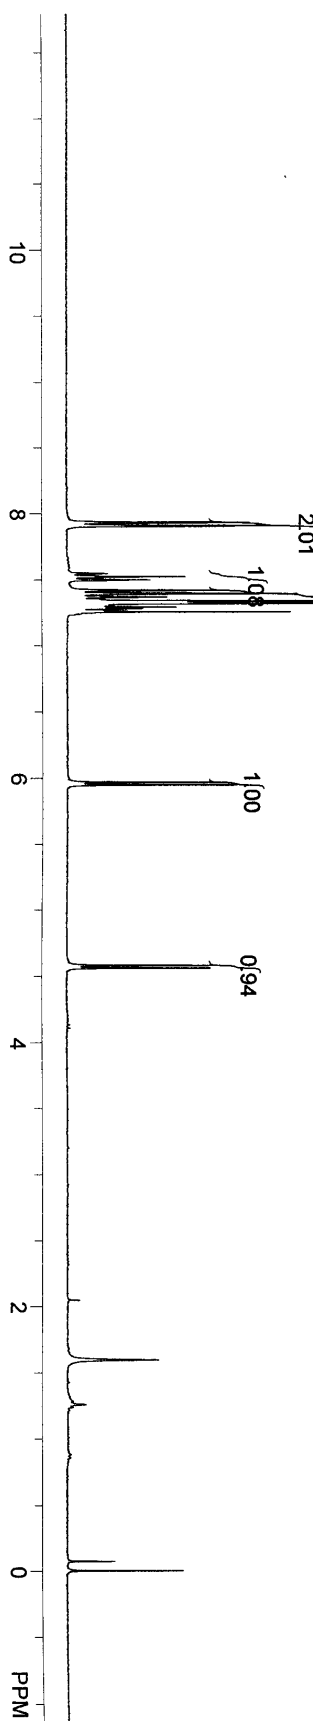

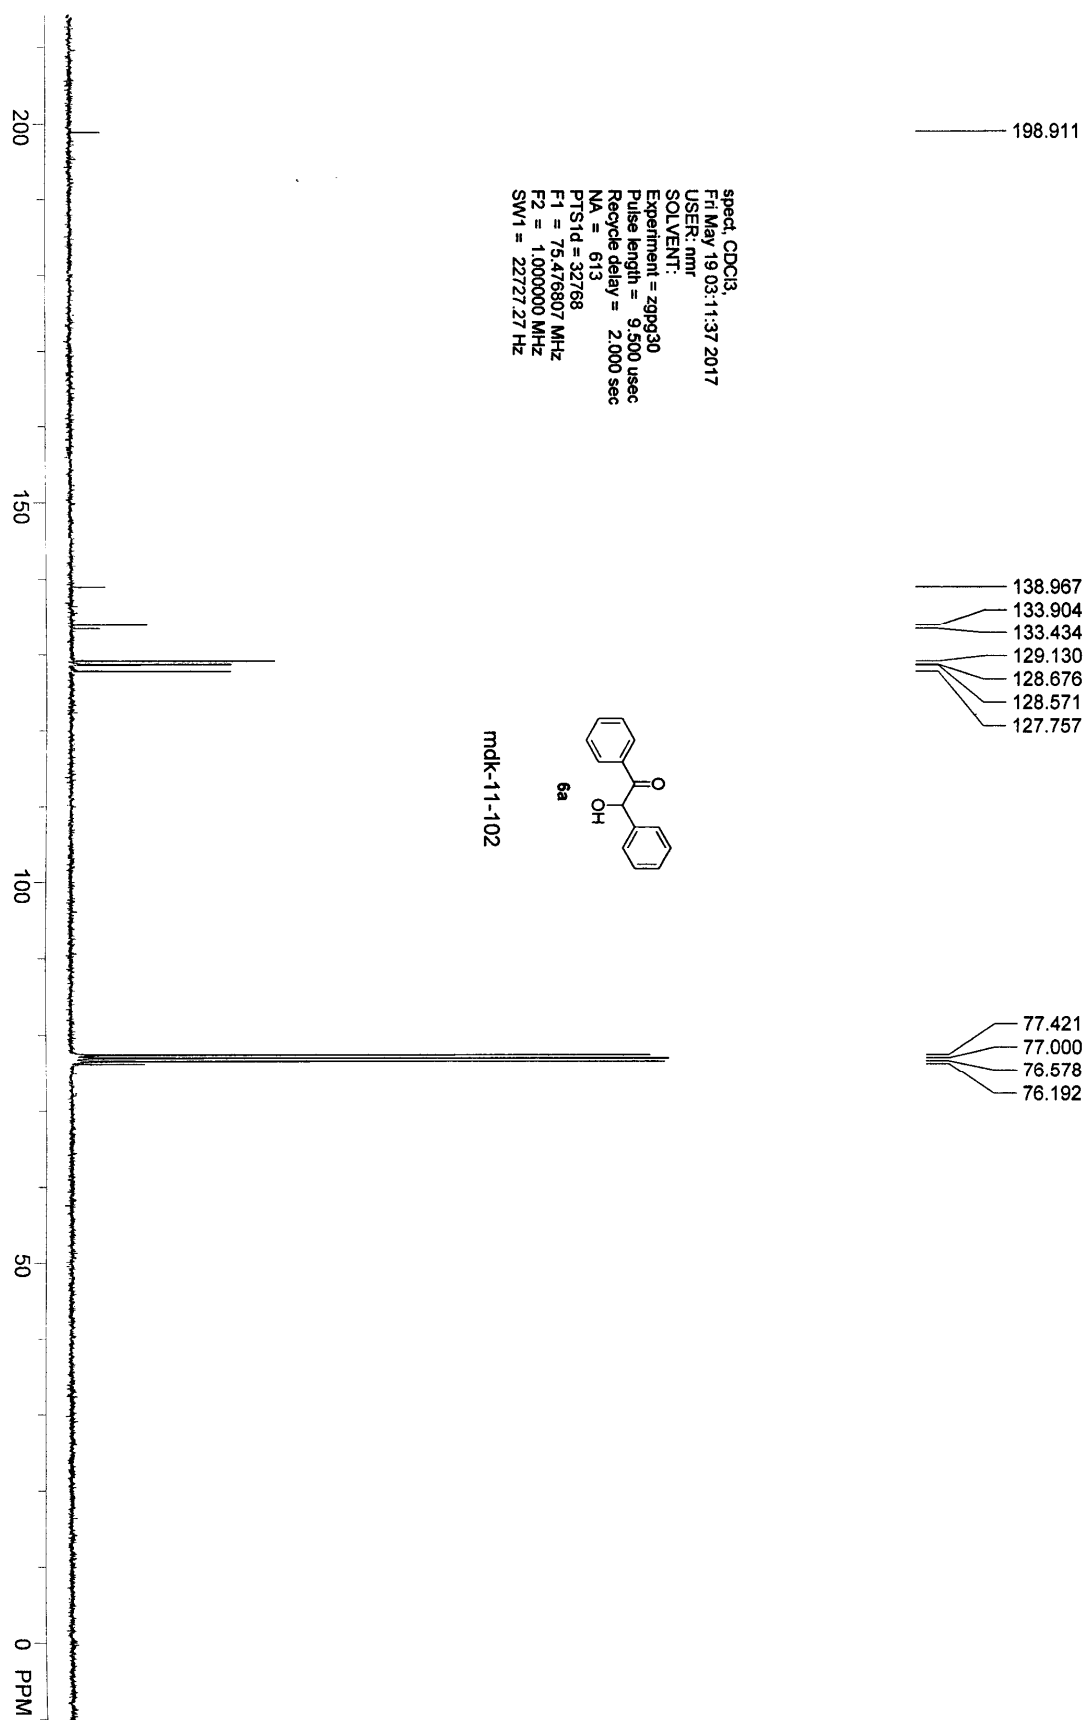

Supplement: c8qo00579f1.pdf [file c8qo00579f1.pdf]
